# Supplementary material for: Anvi’o: an advanced analysis and visualization platform for ‘omics data
Source: PeerJ. 2015 Oct 8;3:e1319. doi: 10.7717/peerj.1319 (PMC4614810; doi:10.7717/peerj.1319)
Supplement: Table S3 — The file includes (I) the proportion of bins in metagenomic, single cell genomic and metatranscriptomic data, (II) the myRAST functional profile of Oceanospirillales desum and bins named “Unknown” and “Cryptic”, and (III) matrix tables combining the RAST functional profiles of Oceanospirillales desum, “Unknown” and “Cryptic” at the category, subsystem and functional level. [file peerj-03-1319-s003.xls]

## Sheet: Proportion of bins
Proportion of DWH bins in 'omic data from the water plume
Gulf of Mexico DWH oil plume data from Mason et al., 2012 and 2014			Context
http://www.nature.com/ismej/journal/v6/n9/abs/ismej201259a.html
http://www.ncbi.nlm.nih.gov/pmc/articles/PMC4085564/
Gulf of Mexico DWH oil plume data from Yergeau et al., 2015
http://aem.asm.org/content/early/2015/06/15/AEM.01470-15.short
			Data from:	Mason et al., 2012	Mason et al., 2012	Mason et al., 2012	Mason et al., 2012	Mason et al., 2012	Mason et al., 2012	Mason et al., 2012	Mason et al., 2014	Yergeau et al., 2015	Yergeau et al., 2015	Yergeau et al., 2015	Yergeau et al., 2015	Yergeau et al., 2015	Yergeau et al., 2015
			Mapping stringency (CLC):	97% identity	97% identity	97% identity	97% identity	97% identity	97% identity	97% identity	97% identity	90% identity	90% identity	90% identity	90% identity	90% identity	90% identity
TABLE FOR NUMBER OF MAPPED READS				5 WEEKS AFTER THE DWH OIL SPILL EVENT								ONE YEAR AFTER THE DWH OIL SPILL EVENT
Bin selection name	GC-Content	RAST best hit	Total size	MG-Uncontaminated	MG-Poximal	MG-Distal	MT-Proximal	MT-Distal	SAG-Oceanospirillales-HWTA	SAG-Oceanospirillales-HWTC	SAG-Colwellia	A6 700m	A6 1284 m	A6 2174m	BM57 850m	BM57 1174m	BM57 1574m
MG Cryptic	0.4399	Bermanella marisrubri	348.59 Kb	27119	1618645	2917318	3300	758	0	0	0	27	62	28	15	50	58
MG Oceanospirillales desum	0.5098	Marinomonas sp. MWYL1	1.07 Mb	268624	18662946	26830645	3992377	1424397	411	1005	15670	96	387	224	78	154	189
MG Unknown	0.4153	Pseudoalteromonas atlantica T6c	1.60 Mb	13506	966564	2247281	3100	614	1733	0	229	116	238	175	125	243	264
SAGs Oceanospirillales	0.4645	Pseudoalteromonas atlantica T6c	1.91 Mbp	5833	15892	18929	102411	52260	3383055	2641507	243200	113	310	279	188	242	248
TABLE FOR PERCENT OF MAPPED READS				5 WEEKS AFTER THE DWH OIL SPILL EVENT								ONE YEAR AFTER THE DWH OIL SPILL EVENT
Bin selection name	GC-Content	RAST best hit	Total size	MG-Uncontaminated	MG-Poximal	MG-Distal	MT-Proximal	MT-Distal	SAG-Oceanospirillales-HWTA	SAG-Oceanospirillales-HWTC	SAG-Colwellia	A6 700m	A6 1284 m	A6 2174m	BM57 850m	BM57 1174m	BM57 1574m
MG Cryptic	0.4399	Bermanella marisrubri	348.59 Kb	0.020715	1.32172	2.01828	0.00514927	0.000896571	0	0	0	0.00124098	0.00409205	0.00181858	0.000930523	0.00135839	0.00194832
MG Oceanospirillales desum	0.5098	Marinomonas sp. MWYL1	1.07 Mb	0.20519	15.2394	18.5622	6.22965	1.68479	0.00473012	0.0146413	0.0501786	0.00441236	0.0255423	0.0145486	0.00483872	0.00418383	0.00634883
MG Unknown	0.4153	Pseudoalteromonas atlantica T6c	1.60 Mb	0.0103166	0.789254	1.55473	0.0048372	0.000726246	0.0199447	0	0.000733306	0.00533161	0.0157082	0.0113661	0.00775436	0.00660176	0.00886821
SAGs Oceanospirillales	0.4645	Pseudoalteromonas atlantica T6c	1.91 Mbp	0.00445557	0.0129767	0.0130956	0.159801	0.0618137	38.9349	38.4828	0.778778	0.00519372	0.0204603	0.0181208	0.0116626	0.00657459	0.00833074
TABLE FOR PERCENT GENOME RECOVERED				5 WEEKS AFTER THE DWH OIL SPILL EVENT								ONE YEAR AFTER THE DWH OIL SPILL EVENT
Bin selection name	GC-Content	RAST best hit	Total size	MG-Uncontaminated	MG-Poximal	MG-Distal	MT-Proximal	MT-Distal	SAG-Oceanospirillales-HWTA	SAG-Oceanospirillales-HWTC	SAG-Colwellia	A6 700m	A6 1284 m	A6 2174m	BM57 850m	BM57 1174m	BM57 1574m
MG Cryptic	0.4399	Bermanella marisrubri	348.59 Kb	67.5821	99.6053	99.8201	28.8208	9.95789	0	0	0	0.120199	0.215727	0.119339	0.0720048	0.222039	0.260193
MG Oceanospirillales desum	0.5098	Marinomonas sp. MWYL1	1.07 Mb	96.0607	99.8316	99.8908	71.4878	20.2408	0.0268934	0.0275471	0.0778788	0.19367	0.185266	0.282848	0.149314	0.252966	0.346626
MG Unknown	0.4153	Pseudoalteromonas atlantica T6c	1.60 Mb	13.3683	99.1286	99.8777	8.07741	1.90647	0.177192	0	0.00498782	0.126317	0.187168	0.120518	0.135856	0.271151	0.26317
SAGs Oceanospirillales	0.4645	Pseudoalteromonas atlantica T6c	1.91 Mbp	0.729353	0.627663	0.588745	0.371607	0.269394	76.7166	55.8499	0.24188	0.137888	0.184444	0.295968	0.115343	0.281269	0.310405

## Sheet: O. desum functions
Functions and activity detected in the Oceanospirillales desum bin (myRAST annotation)
Oceanospirillales desum bin was determined using anvi'o and metagenomic data from Mason et al., 2012		Context
http://www.nature.com/ismej/journal/v6/n9/abs/ismej201259a.html
GENES METADATA						SIGNAL DETECTION OF EACH GENE IN THE 'OMIC DATA FROM MASON ET AL. 2012 AND 2014 (SUMMERIZED USING ANVI'O)
Protein Id	function	contig Id	start	stop	direction	MG_DISTAL	MG_PROXIMAL	MG_UNCONTAMINATED	MT_DISTAL	MT_PROXIMAL	SAG_COLWELLIA	SAG_OCEANOSPIRILLALES_HWTA	SAG_OCEANOSPIRILLALES_HWTC
prot_000000005464	Retron-type RNA-directed DNA polymerase (EC 2.7.7.49)	BM58_1170_1contig28	258	467	f	0.375942	0.532767	0.172916	8.19838	3.26056	12.0079	16.9694	221.254
prot_000000015742	Ribokinase (EC 2.7.1.15)	BM58_1170_1contig27	117	230	r	0.375344	0.531946	0.106924	9.13673	3.25108	6.46486	0	0
prot_000000016799	Acyl carrier protein	BM58_1170_1contig489	1737	1880	r	0.170813	0.138239	0.00837396	0.00336101	0.229355	0	0	0
prot_000000015812	Ribonuclease P protein component (EC 3.1.26.5)	BM58_1170_1contig154	306	629	f	0.224742	0.319675	0.00749347	0.00186561	0.227267	0	0	0
prot_000000013973	Flagellar basal-body P-ring formation protein FlgA	BM58_1170_1contig33	1911	2335	r	0.15324	0.108291	0.0085792	0.000945572	0.205885	0	0	0
prot_000000000066	Site-specific recombinase	BM58_1170_1contig33	1913	2326	f	0.153036	0.10834	0.00879077	0.000944441	0.203759	0	0	0
prot_000000013006	DNA-directed RNA polymerase alpha subunit (EC 2.7.7.6)	BM58_1170_1contig180	4659	5660	f	0.277679	0.312577	0.0100618	0.00982485	0.123397	0	0	0
prot_000000010034	Translation initiation factor 3	BM58_1170_1contig372	1495	1950	r	0.212559	0.141996	0.00816101	0.0180927	0.112907	0	0	0
prot_000000002009	LSU ribosomal protein L3p (L3e)	BM58_1170_1contig149	4183	4458	r	0.218619	0.303219	0.00965937	0.00385553	0.105313	0	0	0
prot_000000010990	Triosephosphate isomerase (EC 5.3.1.1)	BM58_1170_1contig360	128	766	f	0.193597	0.244386	0.00927497	0.00355655	0.100969	0	0	0
prot_000000013878	LSU ribosomal protein L21p	BM58_1170_1contig465	641	946	f	0.174579	0.194592	0.014227	0.00593901	0.0976975	0	0	0
prot_000000000272	Transamidase GatB domain protein	BM58_1170_1contig729	928	1176	f	0.138926	0.160328	0.00630641	0.000316508	0.0960322	0	0	0
prot_000000000841	LSU ribosomal protein L17p	BM58_1170_1contig180	5691	6059	f	0.254009	0.304331	0.00563994	0.00979204	0.0931357	0	0	0
prot_000000012548	LSU ribosomal protein L27p	BM58_1170_1contig465	1064	1246	f	0.189342	0.218552	0.00967655	0.00185784	0.0927635	0	0	0
prot_000000015310	SSU ribosomal protein S10p (S20e)	BM58_1170_1contig468	419	727	r	0.233236	0.282636	0.00741381	0.00370905	0.0881019	0	0	0
prot_000000000547	Preprotein translocase subunit SecG (TC 3.A.5.1.1)	BM58_1170_1contig360	917	1021	f	0.196713	0.208657	0.0113022	0.00703658	0.0867713	0	0	0
prot_000000015318	LSU ribosomal protein L3p (L3e)	BM58_1170_1contig468	65	316	r	0.209072	0.234964	0.00873173	0.00374307	0.0593095	0	0	0
prot_000000005116	Colicin V production protein	BM58_1170_1contig125	992	1384	f	0.118765	0.103125	0.0069575	0.00109053	0.0576724	0	0	0
prot_000000015882	SSU ribosomal protein S13p (S18e)	BM58_1170_1contig180	3243	3599	f	0.318508	0.348553	0.0093581	0.00891791	0.055313	0	0	0
prot_000000006817	Cold shock protein CspE	BM58_1170_1contig210	1280	1432	f	0.208699	0.164982	0.0105488	0.00178756	0.0549496	0	0	0
prot_000000016695	SSU ribosomal protein S4p (S9e)	BM58_1170_1contig180	4019	4636	f	0.203042	0.250575	0.00742446	0.00130154	0.0542383	0	0	0
prot_000000000001	LSU ribosomal protein L20p	BM58_1170_1contig372	798	1130	r	0.194375	0.133388	0.00757383	0.0095844	0.0523651	0	0	0
prot_000000008491	SSU ribosomal protein S14p (S29e) @ SSU ribosomal protein S14p (S29e), zinc-independent	BM58_1170_1contig697	1209	1451	f	0.286316	0.338313	0.00860623	0.0011577	0.0505752	0	0	0
prot_000000011627	Alkyl hydroperoxide reductase subunit C-like protein	BM58_1170_1contig447	1111	1599	f	0.177053	0.133222	0.00890621	0.00496897	0.0487314	0	0	0
prot_000000014392	SSU ribosomal protein S5p (S2e)	BM58_1170_1contig180	547	1008	f	0.272779	0.344802	0.0117049	0.0019332	0.0474164	0	0	0
prot_000000016233	Stringent starvation protein A	BM58_1170_1contig604	1240	1455	f	0.194255	0.167973	0.00142372	0.000561673	0.0465532	0	0	0
prot_000000005033	Ubiquinol-cytochrome C reductase iron-sulfur subunit (EC 1.10.2.2)	BM58_1170_1contig612	223	705	f	0.168006	0.189711	0.00743602	0.00184898	0.0463908	0	0	0
prot_000000013307	ubiquinol cytochrome C oxidoreductase, cytochrome C1 subunit	BM58_1170_1contig604	403	1068	f	0.212057	0.229947	0.00646875	0.00465606	0.0458413	0	0	0
prot_000000005774	Cell division protein MraZ	BM58_1170_1contig161	28	327	r	0.148045	0.143085	0.00471036	0.00256059	0.0450442	0	0	0
prot_000000000740	LSU ribosomal protein L23p (L23Ae)	BM58_1170_1contig149	3226	3513	r	0.257087	0.297035	0.00767561	0.000454427	0.0442386	0	0	0
prot_000000003581	Thioredoxin	BM58_1170_1contig720	1052	1222	r	0.113417	0.140518	0.00483315	0.00205292	0.0440017	0	0	0
prot_000000015971	SSU ribosomal protein S19p (S15e)	BM58_1170_1contig149	2090	2362	r	0.300508	0.375293	0.00761025	0.000395133	0.0439804	0	0	0
prot_000000014586	LSU ribosomal protein L5p (L11e)	BM58_1170_1contig697	679	1194	f	0.300113	0.354314	0.00847633	0.00202361	0.043887	0	0	0
prot_000000015329	LSU ribosomal protein L4p (L1e)	BM58_1170_1contig149	3519	4112	r	0.213754	0.264498	0.00356005	0.000610926	0.0430292	0	0	0
prot_000000001796	Preprotein translocase secY subunit (TC 3.A.5.1.1)	BM58_1170_1contig180	1739	2965	f	0.279615	0.329356	0.0122445	0.0060764	0.0416348	0	0	0
prot_000000014835	SSU ribosomal protein S21p	BM58_1170_1contig729	644	856	f	0.186581	0.194409	0.0121389	0.00227279	0.0415061	0	0	0
prot_000000011722	Transamidase GatB domain protein	BM58_1170_1contig974	17	202	f	0.135764	0.173175	0.00399669	0	0.0412661	0	0	0
prot_000000015674	ATP synthase gamma chain (EC 3.6.3.14)	BM58_1170_1contig158	2115	2888	r	0.237567	0.362333	0.00510206	0.000623327	0.040789	0	0	0
prot_000000010806	LSU ribosomal protein L22p (L17e)	BM58_1170_1contig149	1754	2059	r	0.268496	0.314149	0.00505834	0.00059786	0.0402462	0	0	0
prot_000000000903	C4-type zinc finger protein, DksA/TraR family	BM58_1170_1contig827	982	1347	f	0.165419	0.187082	0.005774	0.00333496	0.0387717	0	0	0
prot_000000013169	ATP synthase beta chain (EC 3.6.3.14)	BM58_1170_1contig158	695	2062	r	0.246598	0.357048	0.00932605	0.00246908	0.0384689	0	0	0
prot_000000006258	LSU ribosomal protein L16p (L10e)	BM58_1170_1contig149	630	1037	r	0.23573	0.27799	0.0138261	0.00140936	0.037325	0	0	0
prot_000000014926	LSU ribosomal protein L2p (L8e)	BM58_1170_1contig149	2383	3192	r	0.281684	0.36428	0.00973826	0.00098817	0.0363023	0	0	0
prot_000000007794	LSU ribosomal protein L34p	BM58_1170_1contig154	144	284	f	0.146833	0.205471	0.00752833	0	0.0357639	0	0	0
prot_000000010556	Ubiquinol--cytochrome c reductase, cytochrome B subunit (EC 1.10.2.2)	BM58_1170_1contig604	35	1086	f	0.203925	0.213427	0.00724848	0.0036768	0.0357232	0	0	0
prot_000000007993	LSU ribosomal protein L15p (L27Ae)	BM58_1170_1contig180	1211	1615	f	0.244794	0.295465	0.0121695	0.00119265	0.0348215	0	0	0
prot_000000000664	Threonyl-tRNA synthetase (EC 6.1.1.3)	BM58_1170_1contig372	2106	2258	r	0.201425	0.136841	0.00856847	0.00538652	0.034651	0	0	0
prot_000000009269	LSU ribosomal protein L11p (L12e)	BM58_1170_1contig334	122	535	f	0.204756	0.239039	0.0137833	0.00208771	0.0343635	0	0	0
prot_000000003054	SSU ribosomal protein S11p (S14e)	BM58_1170_1contig180	3617	3970	f	0.271805	0.298198	0.01358	0.00747479	0.0336361	0	0	0
prot_000000014853	3-hydroxyacyl-[acyl-carrier-protein] dehydratase, FabA form (EC 4.2.1.59)	BM58_1170_1contig1058	269	409	f	0.161316	0.172837	0.00391558	0.00150087	0.0335588	0	0	0
prot_000000003480	Sodium-dependent phosphate transporter	BM58_1170_1contig814	1852	2886	f	0.117914	0.112531	0.00715485	0.00163505	0.0334323	0	0	0
prot_000000011050	ATP synthase alpha chain (EC 3.6.3.14)	BM58_1170_1contig463	299	1285	f	0.218666	0.322172	0.0148225	0.000722599	0.0327963	0	0	0
prot_000000011312	LSU ribosomal protein L1p (L10Ae)	BM58_1170_1contig334	538	1212	f	0.224719	0.249022	0.00403329	0.00354575	0.0325505	0	0	0
prot_000000011698	LSU ribosomal protein L35p	BM58_1170_1contig372	1189	1365	r	0.228114	0.138647	0.00537177	0.00649084	0.0320503	0	0	0
prot_000000013917	SSU ribosomal protein S3p (S3e)	BM58_1170_1contig149	1064	1732	r	0.267888	0.344409	0.006189	0.000780961	0.030282	0	0	0
prot_000000016098	LSU ribosomal protein L24p (L26e)	BM58_1170_1contig697	330	632	f	0.278047	0.272474	0.00557677	0.00113962	0.0299826	0	0	0
prot_000000015817	SSU ribosomal protein S8p (S15Ae)	BM58_1170_1contig697	1577	1966	f	0.292787	0.337699	0.0100366	0.00126658	0.029579	0	0	0
prot_000000013361	LSU ribosomal protein L14p (L23e)	BM58_1170_1contig697	8	298	f	0.203366	0.2338	0.00978106	0.00146577	0.0295255	0	0	0
prot_000000011964	Ubiquinol--cytochrome c reductase, cytochrome B subunit (EC 1.10.2.2)	BM58_1170_1contig612	855	1736	f	0.212414	0.212802	0.00844649	0.00110754	0.0289208	0	0	0
prot_000000006262	SSU ribosomal protein S6p	BM58_1170_1contig641	583	915	f	0.222401	0.218411	0.0198981	0.00427024	0.0278029	0	0	0
prot_000000004925	Ferredoxin--NADP(+) reductase (EC 1.18.1.2)	BM58_1170_1contig1054	882	1436	f	0.138703	0.15445	0.00380723	0.00111387	0.0276237	0	0	0
prot_000000011590	Acyl carrier protein	BM58_1170_1contig464	558	731	r	0.186715	0.105888	0.00488167	0.00180093	0.0276036	0	0	0
prot_000000008998	SSU ribosomal protein S17p (S11e)	BM58_1170_1contig149	194	406	r	0.308054	0.374297	0.0132728	0.000848736	0.0274371	0	0	0
prot_000000008750	Aspartate 1-decarboxylase (EC 4.1.1.11)	BM58_1170_1contig131	647	922	f	0.1404	0.194042	0.00676256	0	0.027195	0	0	0
prot_000000016302	putative cytochrome P450 hydroxylase	BM58_1170_1contig369	38	391	f	0.236033	0.345272	0.0113851	0.000923658	0.0251014	0	0	0
prot_000000002560	N-acetyl-gamma-glutamyl-phosphate reductase (EC 1.2.1.38)	BM58_1170_1contig504	770	1180	f	0.160263	0.193628	0.0119557	0.00121938	0.0237114	0	0	0
prot_000000003369	LSU ribosomal protein L18p (L5e)	BM58_1170_1contig180	203	469	f	0.255976	0.293636	0.00888883	0.00114404	0.023366	0	0	0
prot_000000004696	ATP synthase epsilon chain (EC 3.6.3.14)	BM58_1170_1contig158	255	662	r	0.190927	0.255758	0.00758962	0	0.0225751	0	0	0
prot_000000004919	Electron transfer flavoprotein, alpha subunit	BM58_1170_1contig105	6	587	f	0.114635	0.0990413	0.00454827	0.00020577	0.0221291	0	0	0
prot_000000004882	LSU ribosomal protein L6p (L9e)	BM58_1170_1contig180	4	135	f	0.163348	0.187211	0.00115214	0.00598268	0.0220215	0	0	0
prot_000000005472	LSU ribosomal protein L30p (L7e)	BM58_1170_1contig180	1042	1200	f	0.259363	0.343362	0.00683704	0	0.0218185	0	0	0
prot_000000000727	Cell division trigger factor (EC 5.2.1.8)	BM58_1170_1contig519	271	1380	r	0.181649	0.12461	0.0109115	0.00351717	0.0207603	0	0	0
prot_000000003671	LSU ribosomal protein L29p (L35e)	BM58_1170_1contig149	442	621	r	0.300418	0.346625	0.0181368	0	0.0205523	0	0	0
prot_000000001986	Adenylosuccinate synthetase (EC 6.3.4.4)	BM58_1170_1contig65	1380	2474	f	0.144234	0.203452	0.00911961	0.00100449	0.0200422	0	0	0
prot_000000013262	Rod shape-determining protein MreB	BM58_1170_1contig362	486	1508	r	0.131919	0.167912	0.00439351	0.00571423	0.0196225	0	0	0
prot_000000001308	LSU ribosomal protein L14p (L23e)	BM58_1170_1contig149	2	148	r	0.199006	0.24606	0.00566249	0.00135648	0.0187498	0	0	0
prot_000000013205	DNA gyrase subunit A (EC 5.99.1.3)	BM58_1170_1contig505	1098	1568	f	0.1615	0.130827	0.00528237	0	0.0186437	0	0	0
prot_000000006477	Protein YidD	BM58_1170_1contig154	694	903	f	0.195804	0.275773	0.00725297	0.000138672	0.0185816	0	0	0
prot_000000005750	Ferredoxin, 2Fe-2S	BM58_1170_1contig255	126	332	r	0.11684	0.15874	0.00429826	0.000586213	0.0185717	0	0	0
prot_000000001653	Phosphate:acyl-ACP acyltransferase PlsX	BM58_1170_1contig638	786	1670	r	0.150975	0.120387	0.00333965	0.000222668	0.0185185	0	0	0
prot_000000009006	LSU ribosomal protein L9p	BM58_1170_1contig641	2190	2576	f	0.176047	0.181698	0.00489257	0.00218682	0.0184499	0	0	0
prot_000000007607	Isocitrate lyase (EC 4.1.3.1)	BM58_1170_1contig70	1137	1589	f	0.138422	0.0968966	0.00559075	0	0.0183964	0	0	0
prot_000000004700	LSU ribosomal protein L6p (L9e)	BM58_1170_1contig697	1982	2332	f	0.26947	0.330633	0.0160826	0.00337782	0.0172287	0	0	0
prot_000000005983	Glutamine synthetase type I (EC 6.3.1.2)	BM58_1170_1contig676	3	1166	r	0.230071	0.272819	0.00587585	0.000310466	0.0171541	0	0	0
prot_000000002835	Translation elongation factor Ts	BM58_1170_1contig508	300	1061	r	0.17453	0.159359	0.00674604	0.00047447	0.0163585	0	0	0
prot_000000007937	Integration host factor beta subunit	BM58_1170_1contig99	2866	3075	r	0.139051	0.0909906	0.00619206	0.00517129	0.0160422	0	0	0
prot_000000013335	Succinate dehydrogenase flavoprotein subunit (EC 1.3.99.1)	BM58_1170_1contig779	403	1263	r	0.14608	0.144501	0.00896332	0.000251349	0.0160063	0	0	0
prot_000000001652	Homoserine kinase (EC 2.7.1.39)	BM58_1170_1contig691	1193	1792	r	0.17856	0.122145	0.00368895	0.0017237	0.015401	0	0	0
prot_000000008192	Signal transduction histidine kinase CheA (EC 2.7.3.-)	BM58_1170_1contig12	2580	3523	f	0.16848	0.210191	0.0063194	0.00179539	0.0153296	0	0	0
prot_000000013551	Uncharacterized protein with LysM domain, COG1652	BM58_1170_1contig128	715	1290	f	0.141144	0.188705	0.00667056	0.00107319	0.0151266	0	0	0
prot_000000007563	Glutamate synthase [NADPH] large chain (EC 1.4.1.13)	BM58_1170_1contig98	2	667	f	0.118396	0.176072	0.00814323	0.000179778	0.0150802	0	0	0
prot_000000012573	Glutamate synthase [NADPH] large chain (EC 1.4.1.13)	BM58_1170_1contig36	153	1334	f	0.139518	0.195552	0.0105935	0.000116567	0.01479	0	0	0
prot_000000008379	Nucleoside diphosphate kinase (EC 2.7.4.6)	BM58_1170_1contig290	862	1215	r	0.172536	0.177539	0.00600811	0.000342096	0.0147311	0	0	0
prot_000000004789	3-ketoacyl-CoA thiolase (EC 2.3.1.16) @ Acetyl-CoA acetyltransferase (EC 2.3.1.9)	BM58_1170_1contig366	78	605	r	0.162932	0.19544	0.00822741	0.000866171	0.0145207	0	0	0
prot_000000011573	ATP-dependent Clp protease proteolytic subunit (EC 3.4.21.92)	BM58_1170_1contig386	1142	1726	r	0.136988	0.0990094	0.00682947	0.00397639	0.0143761	0	0	0
prot_000000009097	NADP-dependent malic enzyme (EC 1.1.1.40)	BM58_1170_1contig116	4	999	r	0.143533	0.195817	0.00797664	0.000970933	0.01338	0	0	0
prot_000000011958	DNA-directed RNA polymerase beta' subunit (EC 2.7.7.6)	BM58_1170_1contig192	107	2230	r	0.210607	0.264502	0.00857826	0.000681442	0.0133298	0	0	0
prot_000000001624	ATP phosphoribosyltransferase regulatory subunit (EC 2.4.2.17)	BM58_1170_1contig65	176	1120	f	0.152905	0.205775	0.00408534	0.000510415	0.0132381	0	0	0
prot_000000009054	Putative transporting ATPase	BM58_1170_1contig548	1172	1300	r	0.118746	0.122153	0.00897439	0.000198122	0.0127068	0	0	0
prot_000000005639	Adenosine (5')-pentaphospho-(5'')-adenosine pyrophosphohydrolase (EC 3.6.1.-)	BM58_1170_1contig47	994	1239	f	0.210485	0.202781	0.00327661	0.00245956	0.012585	0	0	0
prot_000000014129	DNA-binding protein HU-beta	BM58_1170_1contig97	342	557	f	0.148495	0.103148	0.00346563	0.00218491	0.0123178	0	0	0
prot_000000012541	Glutamate synthase [NADPH] large chain (EC 1.4.1.13)	BM58_1170_1contig279	86	2266	f	0.132035	0.198809	0.0062117	0.000387207	0.0122939	0	0	0
prot_000000008633	FIG005548: transport protein	BM58_1170_1contig179	174	1670	r	0.19928	0.164688	0.00835749	0.00169193	0.0121726	0	0	0
prot_000000014760	type IV pilus biogenesis protein PilJ	BM58_1170_1contig12	397	2259	f	0.193101	0.22289	0.00512567	0.00155846	0.0121192	0	0	0
prot_000000004571	Exodeoxyribonuclease III (EC 3.1.11.2)	BM58_1170_1contig407	1143	1730	f	0.159738	0.214383	0.00586142	0	0.0121013	0	0	0
prot_000000015795	Ribosomal RNA large subunit methyltransferase N (EC 2.1.1.-)	BM58_1170_1contig290	108	656	r	0.176403	0.199041	0.0108822	0.00215076	0.0119308	0	0	0
prot_000000000222	D-alanyl-D-alanine carboxypeptidase (EC 3.4.16.4)	BM58_1170_1contig475	326	1144	f	0.123686	0.155022	0.00612307	2.50968e-05	0.0116531	0	0	0
prot_000000014478	Na+/H+ antiporter NhaB	BM58_1170_1contig544	55	288	f	0.0846052	0.0875618	0.00417319	0.000518282	0.0113981	0	0	0
prot_000000006717	Translation elongation factor G paralog	BM58_1170_1contig132	11	1168	r	0.143935	0.207474	0.00916939	0.000312076	0.0113713	0	0	0
prot_000000010838	YefM protein (antitoxin to YoeB)	BM58_1170_1contig415	88	267	f	0.172491	0.108551	0.0200896	0	0.0113275	0	0	0
prot_000000001709	Cell division protein FtsZ (EC 3.4.24.-)	BM58_1170_1contig69	427	1287	r	0.130281	0.134349	0.00516271	0.00109948	0.0112981	0	0	0
prot_000000011779	Na(+)-translocating NADH-quinone reductase subunit F (EC 1.6.5.-)	BM58_1170_1contig275	508	1728	f	0.159447	0.127011	0.00896694	0.00177378	0.0112347	0	0	0
prot_000000005870	CTP synthase (EC 6.3.4.2)	BM58_1170_1contig207	1035	1937	f	0.156965	0.170345	0.00923971	0.00153159	0.0109715	0	0	0
prot_000000003040	Cytochrome oxidase biogenesis protein Sco1/SenC/PrrC, putative copper metallochaperone	BM58_1170_1contig196	1769	2104	f	0.223694	0.248999	0.00787365	0.00376338	0.0109225	0	0	0
prot_000000001513	Rod shape-determining protein MreD	BM58_1170_1contig84	1249	1683	r	0.208454	0.229116	0.0123163	0.00271014	0.0107807	0	0	0
prot_000000012987	Amidophosphoribosyltransferase (EC 2.4.2.14)	BM58_1170_1contig125	1478	2899	f	0.134205	0.121554	0.00598453	0.000169115	0.0105692	0	0	0
prot_000000005565	Phosphoserine phosphatase (EC 3.1.3.3)	BM58_1170_1contig565	582	1271	f	0.134278	0.171911	0.00569762	0.00131101	0.0103793	0	0	0
prot_000000010156	Succinate dehydrogenase iron-sulfur protein (EC 1.3.99.1)	BM58_1170_1contig779	8	352	r	0.161846	0.142342	0.00777241	0.000702092	0.0103488	0	0	0
prot_000000009950	Gamma-glutamyl phosphate reductase (EC 1.2.1.41)	BM58_1170_1contig388	289	1431	f	0.0960056	0.13842	0.00379393	0	0.0102913	0	0	0
prot_000000000094	NADPH-dependent glyceraldehyde-3-phosphate dehydrogenase (EC 1.2.1.13)	BM58_1170_1contig1087	68	1045	f	0.155191	0.137665	0.0064462	0	0.0102538	0	0	0
prot_000000003647	Integration host factor alpha subunit	BM58_1170_1contig911	3	146	r	0.144643	0.099471	0.000579611	0.00507529	0.0102253	0	0	0
prot_000000015780	Diacylglycerol kinase (EC 2.7.1.107)	BM58_1170_1contig144	289	579	r	0.126115	0.108638	0.0041899	0.000978571	0.0101326	0	0	0
prot_000000008373	Bacterioferritin	BM58_1170_1contig288	463	783	f	0.203627	0.16688	0.00994453	0.00114722	0.01007	0	0	0
prot_000000014192	D-3-phosphoglycerate dehydrogenase (EC 1.1.1.95)	BM58_1170_1contig173	23	283	r	0.136432	0.182423	0.00335744	0	0.0100621	0	0	0
prot_000000014900	FIG001943: hypothetical protein YajQ	BM58_1170_1contig444	1206	1625	f	0.203791	0.179048	0.0127436	0.00102891	0.0100418	0	0	0
prot_000000009226	3-oxoacyl-[acyl-carrier-protein] synthase, KASI (EC 2.3.1.41)	BM58_1170_1contig1058	691	1848	f	0.131328	0.139657	0.00632936	0.00114811	0.0100255	0	0	0
prot_000000015500	Aspartokinase (EC 2.7.2.4)	BM58_1170_1contig348	363	1565	f	0.137032	0.187351	0.00809493	0.000501324	0.00998802	0	0	0
prot_000000009807	Tryptophanyl-tRNA synthetase (EC 6.1.1.2)	BM58_1170_1contig835	38	1237	r	0.11051	0.10229	0.00557849	0.00110789	0.00994727	0	0	0
prot_000000009301	Type IV pilus biogenesis protein PilM	BM58_1170_1contig421	654	1448	f	0.173074	0.195149	0.00498207	0.0020593	0.00990441	0	0	0
prot_000000000837	Acyl-CoA thioesterase II (EC 3.1.2.-)	BM58_1170_1contig498	368	907	r	0.17663	0.204504	0.0053585	0	0.00981381	0	0	0
prot_000000008825	Fatty acid desaturase (EC 1.14.19.1); Delta-9 fatty acid desaturase (EC 1.14.19.1)	BM58_1170_1contig541	164	775	r	0.143032	0.148967	0.00572173	0	0.00973269	0	0	0
prot_000000008969	Translation initiation factor 2	BM58_1170_1contig428	6	1250	r	0.138499	0.187998	0.00806173	0.000581472	0.00965279	0	0	0
prot_000000000555	BarA-associated response regulator UvrY (= GacA = SirA)	BM58_1170_1contig229	2354	2968	r	0.110359	0.0956184	0.00574384	0.00055463	0.0096401	0	0	0
prot_000000009443	Na(+)-translocating NADH-quinone reductase subunit E (EC 1.6.5.-)	BM58_1170_1contig275	2	484	f	0.142919	0.125356	0.00525729	0.00150323	0.00955815	0	0	0
prot_000000015356	ATP-dependent Clp protease ATP-binding subunit ClpX	BM58_1170_1contig386	8	1012	r	0.158026	0.125411	0.00547792	0.00210007	0.00954402	0	0	0
prot_000000014043	Rubredoxin	BM58_1170_1contig478	2773	2934	r	0.124966	0.15583	0.00368266	0.000750061	0.00954349	0	0	0
prot_000000004219	UDP-3-O-[3-hydroxymyristoyl] N-acetylglucosamine deacetylase (EC 3.5.1.108)	BM58_1170_1contig69	11	322	r	0.138237	0.119556	0.00420007	0.000481486	0.00947365	0	0	0
prot_000000004481	Shikimate kinase I (EC 2.7.1.71)	BM58_1170_1contig31	867	1316	r	0.170316	0.195924	0.00800332	0.000804169	0.00943248	0	0	0
prot_000000007210	Adenylate kinase (EC 2.7.4.3)	BM58_1170_1contig83	2689	3093	f	0.0791412	0.083312	0.0111006	0.000597821	0.00938598	0	0	0
prot_000000013204	OsmC/Ohr family protein	BM58_1170_1contig515	666	1013	r	0.148968	0.19463	0.00493908	0.000619459	0.00936853	0	0	0
prot_000000009298	UDP-3-O-[3-hydroxymyristoyl] glucosamine N-acyltransferase (EC 2.3.1.191)	BM58_1170_1contig736	1189	1605	f	0.124095	0.148491	0.00429617	0.000580576	0.00934837	0	0	0
prot_000000013697	Translation initiation factor 2	BM58_1170_1contig231	835	1452	f	0.133864	0.174215	0.00857747	0.000293581	0.00933704	0	0	0
prot_000000015768	Aconitate hydratase 2 (EC 4.2.1.3)	BM58_1170_1contig512	184	1428	r	0.132142	0.129222	0.00854976	9.70738e-05	0.00917871	0	0	0
prot_000000004952	Phenylalanyl-tRNA synthetase beta chain (EC 6.1.1.20)	BM58_1170_1contig911	298	1245	r	0.182322	0.145685	0.0069479	0.00165774	0.00883547	0	0	0
prot_000000001151	AmpG permease	BM58_1170_1contig24	3	1199	r	0.139096	0.13231	0.00546115	0.000705778	0.00880967	0	0	0
prot_000000004268	Lipoprotein signal peptidase (EC 3.4.23.36)	BM58_1170_1contig420	1096	1512	f	0.144507	0.167246	0.00683331	0	0.00878785	0	0	0
prot_000000011186	Phosphoribosyl-ATP pyrophosphatase (EC 3.6.1.31)	BM58_1170_1contig82	2708	2962	f	0.206355	0.210025	0.00615077	0.00229158	0.00875943	0	0	0
prot_000000000050	Transcription termination protein NusA	BM58_1170_1contig231	12	542	f	0.214695	0.245949	0.011277	0.00207114	0.00866603	0	0	0
prot_000000007374	Probable component of the lipoprotein assembly complex (forms a complex with YaeT, YfgL, and NlpB)	BM58_1170_1contig260	1123	1518	r	0.11948	0.129468	0.0037593	0.000718444	0.00866054	0	0	0
prot_000000010707	Tyrosyl-tRNA synthetase (EC 6.1.1.1)	BM58_1170_1contig49	2173	2343	f	0.10259	0.133336	0.00163474	0	0.00848959	0	0	0
prot_000000004977	Malonyl CoA-acyl carrier protein transacylase (EC 2.3.1.39)	BM58_1170_1contig638	49	525	r	0.133327	0.099325	0.00315031	0.000180125	0.00838243	0	0	0
prot_000000014649	Orotate phosphoribosyltransferase (EC 2.4.2.10)	BM58_1170_1contig407	216	734	r	0.125121	0.171641	0.0032239	0.000808951	0.00837362	0	0	0
prot_000000012691	Cell division protein BolA	BM58_1170_1contig626	983	1165	f	0.162826	0.122775	0.00509801	0.00442565	0.00834481	0	0	0
prot_000000006336	DNA-directed RNA polymerase beta subunit (EC 2.7.7.6)	BM58_1170_1contig485	3	2300	r	0.205894	0.252288	0.0092581	0.00020924	0.00821081	0	0	0
prot_000000015667	Glutamate synthase [NADPH] small chain (EC 1.4.1.13)	BM58_1170_1contig98	863	1606	f	0.156354	0.222228	0.00279198	0	0.00817579	0	0	0
prot_000000008565	Glutamate-ammonia-ligase adenylyltransferase (EC 2.7.7.42)	BM58_1170_1contig340	94	693	f	0.130134	0.161672	0.00619485	0	0.00814456	0	0	0
prot_000000008477	Phenylalanyl-tRNA synthetase alpha chain (EC 6.1.1.20)	BM58_1170_1contig372	1	375	r	0.10456	0.0925949	0.00466413	0.000484331	0.00814376	0	0	0
prot_000000010331	Transcription elongation factor GreA	BM58_1170_1contig752	182	298	r	0.186561	0.246141	0.00446255	0	0.00811891	0	0	0
prot_000000013359	Cysteine desulfurase (EC 2.8.1.7)	BM58_1170_1contig511	479	1399	f	0.100748	0.14809	0.00469076	0	0.00802084	0	0	0
prot_000000009494	RNA polymerase sigma factor RpoD	BM58_1170_1contig709	336	1088	r	0.148724	0.20876	0.00951882	0.000963509	0.00798739	0	0	0
prot_000000001428	18K peptidoglycan-associated outer membrane lipoprotein; Peptidoglycan-associated lipoprotein precursor; Outer membrane protein P6; OmpA/MotB precursor	BM58_1170_1contig525	944	1414	f	0.113046	0.111021	0.00568423	0.00205035	0.00788794	0	0	0
prot_000000014373	Enolase (EC 4.2.1.11)	BM58_1170_1contig291	116	1360	r	0.152377	0.158328	0.00387512	0.000676604	0.0077714	0	0	0
prot_000000010568	3'-to-5' exoribonuclease RNase R	BM58_1170_1contig617	2	274	r	0.137355	0.159433	0.00372524	0.000546083	0.00777009	0	0	0
prot_000000007544	MotA/TolQ/ExbB proton channel family protein	BM58_1170_1contig396	51	116	f	0.110262	0.0844349	0.000958803	0.001895	0.00754299	0	0	0
prot_000000004762	Prolipoprotein diacylglyceryl transferase (EC 2.4.99.-)	BM58_1170_1contig90	934	1224	f	0.164211	0.1888	0.00609626	0.0024027	0.00748562	0	0	0
prot_000000013338	Cytochrome c oxidase subunit CcoN (EC 1.9.3.1)	BM58_1170_1contig1108	58	546	r	0.117203	0.115663	0.00482255	0.000197967	0.00747859	0	0	0
prot_000000002442	Anthranilate synthase, aminase component (EC 4.1.3.27)	BM58_1170_1contig663	3	341	r	0.118687	0.144748	0.0104686	0.00177924	0.00736032	0	0	0
prot_000000004848	Translation elongation factor P Lys34:lysine transferase	BM58_1170_1contig296	177	944	f	0.154542	0.175973	0.00427056	0.000314889	0.0072366	0	0	0
prot_000000014780	NADPH dependent preQ0 reductase (EC 1.7.1.13)	BM58_1170_1contig20	1209	1796	f	0.103906	0.1141	0.0048286	0.000205724	0.00714747	0	0	0
prot_000000014556	FIG023677: hypothetical protein	BM58_1170_1contig853	39	281	f	0.133694	0.0965343	0.00350819	0.000873263	0.0071132	0	0	0
prot_000000004192	Na(+)-translocating NADH-quinone reductase subunit A (EC 1.6.5.-)	BM58_1170_1contig555	3	671	f	0.127129	0.102844	0.0027018	0.000770115	0.0070648	0	0	0
prot_000000012139	RNA polymerase sigma-54 factor RpoN	BM58_1170_1contig185	1604	2530	f	0.175755	0.210262	0.00984839	0.000650747	0.00698167	0	0	0
prot_000000014470	Isoleucyl-tRNA synthetase (EC 6.1.1.5)	BM58_1170_1contig420	14	1018	f	0.12833	0.157461	0.00543358	0.000120279	0.00697447	0	0	0
prot_000000013721	Carbamoyl-phosphate synthase large chain (EC 6.3.5.5)	BM58_1170_1contig752	587	1198	r	0.109646	0.173105	0.00496887	0	0.00678431	0	0	0
prot_000000011932	Metal-dependent hydrolases of the beta-lactamase superfamily I	BM58_1170_1contig1052	374	1024	r	0.151212	0.125576	0.00900819	0.000613088	0.00678361	0	0	0
prot_000000003358	D-alanine aminotransferase (EC 2.6.1.21)	BM58_1170_1contig635	67	510	r	0.14202	0.188202	0.00419606	0.00109038	0.00674489	0	0	0
prot_000000005585	Hypothetical protein YaeJ with similarity to translation release factor	BM58_1170_1contig701	280	555	f	0.117483	0.0966291	0.011134	0	0.0066363	0	0	0
prot_000000001737	Putative sulfate permease	BM58_1170_1contig276	10	609	r	0.104673	0.0789343	0.00449936	0.000403205	0.00661018	0	0	0
prot_000000010847	LSU ribosomal protein L33p @ LSU ribosomal protein L33p, zinc-independent	BM58_1170_1contig481	121	216	f	0.227693	0.231112	0.0103982	0.00216096	0.00656853	0	0	0
prot_000000016547	Tetraacyldisaccharide 4'-kinase (EC 2.7.1.130)	BM58_1170_1contig139	361	708	f	0.112193	0.0904729	0.00250528	0	0.00652241	0	0	0
prot_000000016376	Iron-sulfur cluster regulator IscR	BM58_1170_1contig511	7	165	f	0.0663032	0.0986034	0.00543099	0.000924806	0.00647268	0	0	0
prot_000000003846	Peptide chain release factor 2; programmed frameshift-containing	BM58_1170_1contig145	3317	4348	r	0.116697	0.128506	0.00598459	0.000816388	0.00641475	0	0	0
prot_000000003971	Peptidase, M23/M37 family	BM58_1170_1contig49	774	1334	r	0.142356	0.186234	0.00718651	0.000329933	0.00640136	0	0	0
prot_000000004955	4-amino-6-deoxy-N-Acetyl-D-hexosaminyl-(Lipid carrier) acetyltrasferase	BM58_1170_1contig79	2839	3192	f	0.162714	0.0793293	0.00140219	0.00900738	0.0063905	0	0	0
prot_000000012079	Translation elongation factor P	BM58_1170_1contig296	1	72	f	0.0487449	0.0702084	0.000125397	0	0.00634753	0	0	0
prot_000000005828	S-adenosylmethionine synthetase (EC 2.5.1.6)	BM58_1170_1contig607	1	663	r	0.127642	0.184377	0.0135747	0.000182417	0.00634644	0	0	0
prot_000000011868	Cell division protein FtsA	BM58_1170_1contig349	269	1213	f	0.167549	0.169252	0.0073634	0.00161951	0.00633879	0	0	0
prot_000000002154	Membrane-associated zinc metalloprotease	BM58_1170_1contig73	19	1023	f	0.092907	0.0949363	0.00562445	0.000601393	0.00627773	0	0	0
prot_000000010000	tRNA-(ms[2]io[6]A)-hydroxylase (EC 1.-.-.-)	BM58_1170_1contig447	415	732	f	0.199023	0.110042	0.00388586	0	0.00625958	0	0	0
prot_000000004755	Inner membrane protein translocase component YidC, long form	BM58_1170_1contig137	31	1407	f	0.166968	0.24289	0.00793863	0.000411601	0.00624517	0	0	0
prot_000000004464	Ribonuclease T (EC 3.1.13.-)	BM58_1170_1contig256	268	810	r	0.130241	0.106268	0.00934473	0	0.00622485	0	0	0
prot_000000013344	Phosphoglucosamine mutase (EC 5.4.2.10)	BM58_1170_1contig772	1102	1392	f	0.0940218	0.115335	0.00592595	0	0.00616923	0	0	0
prot_000000000545	Phosphoribosylformylglycinamidine synthase, synthetase subunit (EC 6.3.5.3) / Phosphoribosylformylglycinamidine synthase, glutamine amidotransferase subunit (EC 6.3.5.3)	BM58_1170_1contig876	740	1243	r	0.104907	0.173528	0.00283539	0	0.0061594	0	0	0
prot_000000007268	Cytoplasmic axial filament protein CafA and Ribonuclease G (EC 3.1.4.-)	BM58_1170_1contig84	1	1143	r	0.170542	0.187161	0.00464779	0.000211488	0.00613312	0	0	0
prot_000000012387	Choline dehydrogenase (EC 1.1.99.1)	BM58_1170_1contig536	273	2293	r	0.151301	0.175168	0.00676144	0.000239128	0.0061158	0	0	0
prot_000000006092	DNA-binding protein HU-beta	BM58_1170_1contig478	2370	2552	r	0.202545	0.252036	0.00424659	0.004492	0.0060069	0	0	0
prot_000000013895	tolB protein precursor, periplasmic protein involved in the tonb-independent uptake of group A colicins	BM58_1170_1contig525	2	439	f	0.146553	0.126327	0.0103245	0.000364766	0.00587421	0	0	0
prot_000000002357	RNA polymerase sigma factor RpoE	BM58_1170_1contig136	658	1011	r	0.0884645	0.108236	0.00590242	0	0.00586439	0	0	0
prot_000000006297	Lipid carrier : UDP-N-acetylgalactosaminyltransferase (EC 2.4.1.-)	BM58_1170_1contig271	4197	4784	r	0.154044	0.0840917	0.00319884	0.00178362	0.00586224	0	0	0
prot_000000013899	FIG000988: Predicted permease	BM58_1170_1contig347	1474	1758	f	0.17791	0.194265	0.0053331	0.00119909	0.00573428	0	0	0
prot_000000011816	Carbamoyl-phosphate synthase small chain (EC 6.3.5.5)	BM58_1170_1contig988	788	1348	r	0.102428	0.165924	0.0052079	0.000431285	0.00549783	0	0	0
prot_000000004101	Translation elongation factor P-related protein	BM58_1170_1contig160	1032	1595	f	0.167362	0.128407	0.012726	0.0028785	0.00548246	0	0	0
prot_000000013922	Signal transduction histidine kinase CheA (EC 2.7.3.-)	BM58_1170_1contig433	52	1056	r	0.154366	0.212233	0.00649538	0.000359633	0.00546999	0	0	0
prot_000000002846	NAD synthetase (EC 6.3.1.5) / Glutamine amidotransferase chain of NAD synthetase	BM58_1170_1contig234	1138	1752	f	0.0943149	0.0931897	0.00223788	0.000196677	0.00545322	0	0	0
prot_000000012046	Membrane-bound lytic murein transglycosylase B precursor (EC 3.2.1.-)	BM58_1170_1contig795	150	644	r	0.0994919	0.123123	0.00447648	9.77812e-06	0.00542783	0	0	0
prot_000000014075	Iron-sulfur cluster assembly ATPase protein SufC	BM58_1170_1contig108	1391	2089	r	0.166951	0.190377	0.00913945	0.000346017	0.00540479	0	0	0
prot_000000010372	FIG000906: Predicted Permease	BM58_1170_1contig725	682	1614	r	0.13362	0.160815	0.00467676	0	0.00540015	0	0	0
prot_000000000010	GTP cyclohydrolase I (EC 3.5.4.16) type 2	BM58_1170_1contig20	236	1090	f	0.125796	0.1125	0.00745133	0.000564206	0.00530186	0	0	0
prot_000000015941	TsaD/Kae1/Qri7 protein, required for threonylcarbamoyladenosine t(6)A37 formation in tRNA	BM58_1170_1contig729	17	238	r	0.0827015	0.104258	0.0036334	0.00119121	0.00525312	0	0	0
prot_000000015464	Iron-sulfur cluster assembly protein SufD	BM58_1170_1contig108	171	398	r	0.184982	0.204621	0.0132548	0.000946927	0.00521063	0	0	0
prot_000000001793	Dihydrolipoamide dehydrogenase of 2-oxoglutarate dehydrogenase (EC 1.8.1.4)	BM58_1170_1contig150	1659	2189	r	0.117138	0.101791	0.00577706	0	0.0052071	0	0	0
prot_000000000317	Peptidyl-prolyl cis-trans isomerase PpiB (EC 5.2.1.8)	BM58_1170_1contig332	1119	1544	f	0.123068	0.104349	0.00539876	0.000971761	0.00518358	0	0	0
prot_000000004452	Outer membrane protein assembly factor YaeT precursor	BM58_1170_1contig73	1307	1951	f	0.158094	0.13752	0.00615665	0.000112509	0.00515561	0	0	0
prot_000000012739	Dihydropteroate synthase (EC 2.5.1.15)	BM58_1170_1contig772	256	1020	f	0.127617	0.181426	0.00553341	0	0.00509021	0	0	0
prot_000000009310	Lipid-A-disaccharide synthase (EC 2.4.1.182)	BM58_1170_1contig908	15	734	f	0.0892509	0.0925734	0.00528447	0.000166276	0.00508047	0	0	0
prot_000000012374	Hypothetical nudix hydrolase YeaB	BM58_1170_1contig492	812	955	r	0.119512	0.161817	0.00352065	0	0.00507079	0	0	0
prot_000000001625	MotA/TolQ/ExbB proton channel family protein	BM58_1170_1contig743	1862	2362	r	0.099301	0.0866597	0.00761772	0.000480624	0.00506555	0	0	0
prot_000000005887	Carbon storage regulator	BM58_1170_1contig348	1885	2037	f	0.214134	0.202651	0.00777494	0.00151744	0.0050312	0	0	0
prot_000000004775	Iron-sulfur cluster assembly protein SufB	BM58_1170_1contig511	1596	2453	f	0.144629	0.177269	0.00883911	0.000770777	0.00497462	0	0	0
prot_000000001052	N-acetylglucosamine-1-phosphate uridyltransferase (EC 2.7.7.23) / Glucosamine-1-phosphate N-acetyltransferase (EC 2.3.1.157)	BM58_1170_1contig66	18	1109	r	0.120941	0.186918	0.00325432	0	0.00488513	0	0	0
prot_000000014490	Glutamyl-tRNA synthetase (EC 6.1.1.17) @ Glutamyl-tRNA(Gln) synthetase (EC 6.1.1.24)	BM58_1170_1contig118	1260	1700	f	0.111125	0.0871675	0.0111892	0.00027171	0.00487461	0	0	0
prot_000000002100	Acetylglutamate kinase (EC 2.7.2.8)	BM58_1170_1contig7	39	680	f	0.138575	0.198556	0.00854734	0.000186509	0.00486619	0	0	0
prot_000000002136	Phosphoserine aminotransferase (EC 2.6.1.52)	BM58_1170_1contig398	605	1192	f	0.1301	0.107128	0.0122782	0.000205724	0.004847	0	0	0
prot_000000002427	Cys regulon transcriptional activator CysB	BM58_1170_1contig276	826	1686	f	0.144934	0.107967	0.00610651	0.000560269	0.00480514	0	0	0
prot_000000006084	Chemotaxis protein methyltransferase CheR (EC 2.1.1.80)	BM58_1170_1contig12	2523	2996	f	0.155187	0.179328	0.00405272	0.00132504	0.00476313	0	0	0
prot_000000001830	FKBP-type peptidyl-prolyl cis-trans isomerase SlpA (EC 5.2.1.8)	BM58_1170_1contig420	1679	1783	f	0.152437	0.175529	0.00692197	0	0.00476199	0	0	0
prot_000000004502	Hypoxanthine-guanine phosphoribosyltransferase (EC 2.4.2.8)	BM58_1170_1contig725	139	627	r	0.120472	0.141583	0.00239868	0.000153424	0.00472074	0	0	0
prot_000000004074	Serine hydroxymethyltransferase (EC 2.1.2.1)	BM58_1170_1contig155	19	1053	r	0.107609	0.161742	0.0075171	0.00023241	0.00467467	0	0	0
prot_000000015394	UDP-N-acetylglucosamine 1-carboxyvinyltransferase (EC 2.5.1.7)	BM58_1170_1contig320	1	1083	f	0.0930675	0.139909	0.00771162	0.000111608	0.00466563	0	0	0
prot_000000012253	ATP phosphoribosyltransferase (EC 2.4.2.17)	BM58_1170_1contig320	1162	1737	f	0.11029	0.161789	0.00527665	0.000789664	0.00463594	0	0	0
prot_000000013378	CDP-diacylglycerol--glycerol-3-phosphate 3-phosphatidyltransferase (EC 2.7.8.5)	BM58_1170_1contig229	90	470	r	0.121791	0.107962	0.00469815	0	0.00461796	0	0	0
prot_000000005139	ChlI component of cobalt chelatase involved in B12 biosynthesis	BM58_1170_1contig17	1323	1580	f	0.103771	0.175938	0.00329353	0	0.00460881	0	0	0
prot_000000007552	ATPase, AFG1 family	BM58_1170_1contig891	512	1312	f	0.197046	0.226429	0.00775848	0.00015095	0.00459444	0	0	0
prot_000000013834	Biopolymer transport protein ExbD/TolR	BM58_1170_1contig396	194	517	f	0.170637	0.128408	0.00667049	0.000957105	0.00455126	0	0	0
prot_000000000104	Na(+)-translocating NADH-quinone reductase subunit B (EC 1.6.5.-)	BM58_1170_1contig555	731	1210	f	0.116375	0.101275	0.00282921	0	0.00452425	0	0	0
prot_000000004668	NADP-dependent malic enzyme (EC 1.1.1.40)	BM58_1170_1contig867	7	231	f	0.0967924	0.13562	0.00311535	0	0.0045066	0	0	0
prot_000000003304	Rod shape-determining protein MreC	BM58_1170_1contig84	1766	2212	r	0.129409	0.177471	0.00778766	0	0.00448146	0	0	0
prot_000000013102	3-hydroxyacyl-[acyl-carrier-protein] dehydratase, FabZ form (EC 4.2.1.59)	BM58_1170_1contig736	1909	2109	f	0.111532	0.109528	0.00545107	0.00231859	0.00447579	0	0	0
prot_000000002730	Fe-S oxidoreductase	BM58_1170_1contig54	964	1548	r	0.161227	0.116906	0.00827776	0.00275432	0.00445496	0	0	0
prot_000000000842	Legionaminic acid biosynthesis protein PtmG	BM58_1170_1contig79	8835	9551	f	0.138697	0.0557689	0.00173078	0.00281323	0.00434205	0	0	0
prot_000000000244	Tyrosyl-tRNA synthetase (EC 6.1.1.1)	BM58_1170_1contig538	443	1327	r	0.19508	0.248511	0.00842382	0.000982198	0.00432734	0	0	0
prot_000000014025	Protein export cytoplasm chaperone protein (SecB, maintains protein to be exported in unfolded state)	BM58_1170_1contig601	78	455	r	0.185649	0.224107	0.00168179	0.000960953	0.00432082	0	0	0
prot_000000011609	2-keto-3-deoxy-D-arabino-heptulosonate-7-phosphate synthase I alpha (EC 2.5.1.54)	BM58_1170_1contig282	429	1349	r	0.118416	0.0954708	0.00322394	0.00228787	0.00431726	0	0	0
prot_000000004356	Thiopurine S-methyltransferase (EC 2.1.1.67)	BM58_1170_1contig577	1059	1442	r	0.114793	0.116657	0.00297658	0	0.00426714	0	0	0
prot_000000003618	Indole-3-glycerol phosphate synthase (EC 4.1.1.48)	BM58_1170_1contig801	319	1086	f	0.1282	0.180321	0.00973949	0.000157444	0.00426642	0	0	0
prot_000000013368	Imidazole glycerol phosphate synthase cyclase subunit (EC 4.1.3.-)	BM58_1170_1contig79	7137	7514	f	0.173648	0.0841266	0.00333771	0.00489446	0.00425623	0	0	0
prot_000000016489	Chromosome (plasmid) partitioning protein ParA	BM58_1170_1contig707	612	1307	r	0.146669	0.223483	0.00958456	0.000192868	0.00425532	0	0	0
prot_000000008243	Phosphoserine phosphatase (EC 3.1.3.3)	BM58_1170_1contig47	156	764	r	0.185594	0.190232	0.00354788	0	0.00424856	0	0	0
prot_000000014474	FKBP-type peptidyl-prolyl cis-trans isomerase FklB (EC 5.2.1.8)	BM58_1170_1contig115	625	783	r	0.166167	0.162552	0.00717379	0	0.0042446	0	0	0
prot_000000010464	Orotidine 5'-phosphate decarboxylase (EC 4.1.1.23)	BM58_1170_1contig13	533	1174	r	0.151812	0.123003	0.00359209	0.000563294	0.00423715	0	0	0
prot_000000001236	putative integrase	BM58_1170_1contig40	401	652	f	0.374055	0.451036	0.0198375	0.00387778	0.004229	0	0	0
prot_000000010873	3-oxoacyl-[acyl-carrier protein] reductase (EC 1.1.1.100)	BM58_1170_1contig464	893	1351	r	0.1371	0.122775	0.00941322	0	0.00422888	0	0	0
prot_000000002538	2-isopropylmalate synthase (EC 2.3.3.13)	BM58_1170_1contig78	1211	2338	f	0.127985	0.190858	0.00680651	0	0.00422812	0	0	0
prot_000000015241	CTP synthase (EC 6.3.4.2)	BM58_1170_1contig291	1503	1868	r	0.0900614	0.0983563	0.00576703	0.000982621	0.00417454	0	0	0
prot_000000013978	GTP-binding protein EngA	BM58_1170_1contig3	1539	2729	f	0.126429	0.160793	0.00496586	0.000202958	0.00416243	0	0	0
prot_000000008913	Sulfate permease	BM58_1170_1contig43	18	779	f	0.131551	0.160595	0.00432289	0	0.00415146	0	0	0
prot_000000006588	Fumarate hydratase class I, aerobic (EC 4.2.1.2)	BM58_1170_1contig319	9	1079	r	0.107367	0.110252	0.00487911	0.00011286	0.00414441	0	0	0
prot_000000003804	UDP-N-acetylglucosamine 4,6-dehydratase (EC 4.2.1.-)	BM58_1170_1contig99	143	1219	r	0.171934	0.0819787	0.00351127	0.0104587	0.00412859	0	0	0
prot_000000000605	Siroheme synthase / Precorrin-2 oxidase (EC 1.3.1.76) / Sirohydrochlorin ferrochelatase (EC 4.99.1.4) / Uroporphyrinogen-III methyltransferase (EC 2.1.1.107)	BM58_1170_1contig357	209	823	f	0.128088	0.106356	0.00812879	0	0.00410286	0	0	0
prot_000000006012	Phosphoribosyl-AMP cyclohydrolase (EC 3.5.4.19)	BM58_1170_1contig20	2128	2397	f	0.0746828	0.0760147	0.00722073	0	0.00408563	0	0	0
prot_000000000227	Isocitrate dehydrogenase [NADP] (EC 1.1.1.42); Monomeric isocitrate dehydrogenase [NADP] (EC 1.1.1.42)	BM58_1170_1contig295	34	1374	f	0.147263	0.115133	0.00827024	0.000270358	0.0040556	0	0	0
prot_000000011631	Glycyl-tRNA synthetase alpha chain (EC 6.1.1.14)	BM58_1170_1contig369	855	1334	f	0.12518	0.19478	0.0025265	0	0.00405123	0	0	0
prot_000000008188	Argininosuccinate lyase (EC 4.3.2.1)	BM58_1170_1contig292	120	1457	r	0.140957	0.194474	0.00843434	8.94182e-05	0.00404124	0	0	0
prot_000000016555	GTP pyrophosphokinase (EC 2.7.6.5), (p)ppGpp synthetase I	BM58_1170_1contig461	181	1032	r	0.157321	0.206637	0.0106376	0.000283807	0.00402036	0	0	0
prot_000000002724	Sigma factor RpoE negative regulatory protein RseA	BM58_1170_1contig136	2	556	r	0.0675763	0.0668017	0.00178806	0.000653934	0.00398775	0	0	0
prot_000000016240	UDP-2,3-diacylglucosamine diphosphatase (EC 3.6.1.54)	BM58_1170_1contig332	1607	2269	f	0.0907827	0.08967	0.00394981	0	0.00388143	0	0	0
prot_000000006904	Phosphoribosylaminoimidazole carboxylase catalytic subunit (EC 4.1.1.21)	BM58_1170_1contig282	2	331	r	0.109587	0.1011	0.00440906	0	0.00385735	0	0	0
prot_000000015591	Lipoprotein releasing system transmembrane protein LolE	BM58_1170_1contig624	1	1056	r	0.112596	0.0981181	0.0073737	0.000103018	0.00381293	0	0	0
prot_000000003644	Ferric iron ABC transporter, iron-binding protein	BM58_1170_1contig265	41	565	f	0.106891	0.140226	0.00696258	0	0.00379783	0	0	0
prot_000000011057	Acetyl-coenzyme A carboxyl transferase alpha chain (EC 6.4.1.2) / Acetyl-coenzyme A carboxyl transferase beta chain (EC 6.4.1.2) / Biotin carboxylase of acetyl-CoA carboxylase (EC 6.3.4.14) / Biotin carboxyl carrier protein of acetyl-CoA carboxylase	BM58_1170_1contig624	1725	2309	f	0.140291	0.1122	0.00864473	0.0017535	0.00377583	0	0	0
prot_000000002913	Peptidyl-prolyl cis-trans isomerase PpiC (EC 5.2.1.8)	BM58_1170_1contig76	1064	1330	r	0.156863	0.136729	0.00179865	0.00161164	0.00375003	0	0	0
prot_000000004152	Tryptophanyl-tRNA synthetase (EC 6.1.1.2)	BM58_1170_1contig341	18	65	r	0.0413857	0.032111	0.00129894	0.000385404	0.00370557	0	0	0
prot_000000000295	3-demethylubiquinone-9 3-methyltransferase (EC 2.1.1.64)	BM58_1170_1contig527	447	1094	f	0.105938	0.0877156	0.00437066	0.00074285	0.0036933	0	0	0
prot_000000016495	Phosphoribosylformylglycinamidine cyclo-ligase (EC 6.3.3.1)	BM58_1170_1contig53	722	1693	f	0.0889496	0.0824451	0.00926754	0	0.00368375	0	0	0
prot_000000007189	Ribonuclease D (EC 3.1.26.3)	BM58_1170_1contig355	399	767	r	0.15068	0.134609	0.0085852	0	0.00364818	0	0	0
prot_000000013773	Riboflavin synthase eubacterial/eukaryotic (EC 2.5.1.9)	BM58_1170_1contig321	352	717	f	0.106552	0.0963542	0.00413681	0	0.00364311	0	0	0
prot_000000001059	Ribonuclease E (EC 3.1.26.12)	BM58_1170_1contig487	22	1074	r	0.138881	0.113836	0.00693691	0.00106755	0.00360803	0	0	0
prot_000000005276	2,3,4,5-tetrahydropyridine-2,6-dicarboxylate N-succinyltransferase (EC 2.3.1.117)	BM58_1170_1contig240	44	1027	f	0.101688	0.0988804	0.00609395	0	0.00360393	0	0	0
prot_000000015509	Glucosamine--fructose-6-phosphate aminotransferase [isomerizing] (EC 2.6.1.16)	BM58_1170_1contig524	5	1732	r	0.140027	0.204246	0.00562527	0.000767073	0.00359199	0	0	0
prot_000000015623	Serine/threonine protein kinase involved in cell cycle control	BM58_1170_1contig432	634	1086	f	0.094465	0.116316	0.00475643	0.000267168	0.00358743	0	0	0
prot_000000010591	Bacterioferritin	BM58_1170_1contig46	234	1180	f	0.172818	0.168441	0.0134072	0.000892295	0.00357562	0	0	0
prot_000000012511	3-ketoacyl-CoA thiolase (EC 2.3.1.16)	BM58_1170_1contig818	98	1174	r	0.115363	0.156192	0.00552075	0.000290676	0.003564	0	0	0
prot_000000011323	LptA, protein essential for LPS transport across the periplasm	BM58_1170_1contig185	317	619	f	0.160184	0.194287	0.0012038	0	0.00354899	0	0	0
prot_000000007195	UDP-N-acetylmuramoylalanyl-D-glutamate--2,6-diaminopimelate ligase (EC 6.3.2.13)	BM58_1170_1contig491	651	1424	f	0.102539	0.114547	0.00452618	0.000468667	0.00352481	0	0	0
prot_000000012582	DNA gyrase subunit B (EC 5.99.1.3)	BM58_1170_1contig242	3	2267	r	0.146438	0.215879	0.00630164	3.52038e-05	0.00352386	0	0	0
prot_000000014510	Cytochrome c-type biogenesis protein CcmE, heme chaperone	BM58_1170_1contig122	211	528	f	0.0820861	0.0916419	0.00302657	0.000636179	0.00346699	0	0	0
prot_000000010053	Oxaloacetate decarboxylase beta chain (EC 4.1.1.3)	BM58_1170_1contig59	1156	1776	f	0.0854523	0.115108	0.00374316	0.000194774	0.0034594	0	0	0
prot_000000003760	GTP pyrophosphokinase (EC 2.7.6.5), (p)ppGpp synthetase II / Guanosine-3',5'-bis(diphosphate) 3'-pyrophosphohydrolase (EC 3.1.7.2)	BM58_1170_1contig461	10	927	r	0.146014	0.196439	0.00943578	0.00026338	0.00345016	0	0	0
prot_000000012786	Arsenate reductase (EC 1.20.4.1)	BM58_1170_1contig127	795	1130	f	0.0996052	0.0813859	0.00516409	0	0.00338788	0	0	0
prot_000000004594	FIG005107: hypothetical protein	BM58_1170_1contig853	451	621	f	0.154011	0.108911	0.00867997	0	0.00337933	0	0	0
prot_000000004515	Proton/glutamate symport protein @ Sodium/glutamate symport protein	BM58_1170_1contig478	510	1520	r	0.130305	0.189925	0.00462327	0.000478257	0.00336048	0	0	0
prot_000000002531	Rod shape-determining protein RodA	BM58_1170_1contig795	878	1867	r	0.102974	0.137958	0.00350528	0.000199028	0.00333878	0	0	0
prot_000000010252	Transcriptional regulator SlmA, TetR family	BM58_1170_1contig7	954	1367	f	0.120426	0.159112	0.00835603	0.000266081	0.00333462	0	0	0
prot_000000013092	tRNA (cytidine(34)-2'-O)-methyltransferase (EC 2.1.1.207)	BM58_1170_1contig190	73	531	r	0.136099	0.160745	0.00577855	0	0.00333408	0	0	0
prot_000000000562	Oxaloacetate decarboxylase alpha chain (EC 4.1.1.3)	BM58_1170_1contig59	15	911	f	0.0995966	0.13103	0.00644174	0.000673883	0.00331915	0	0	0
prot_000000012183	1-deoxy-D-xylulose 5-phosphate synthase (EC 2.2.1.7)	BM58_1170_1contig683	6	863	r	0.161841	0.184984	0.00352773	0	0.00329635	0	0	0
prot_000000016243	Adenylosuccinate lyase (EC 4.3.2.2)	BM58_1170_1contig413	3	1361	r	0.118372	0.10028	0.00917697	0.000230315	0.00328888	0	0	0
prot_000000012440	Methionine aminopeptidase (EC 3.4.11.18)	BM58_1170_1contig254	165	902	f	0.151097	0.153915	0.00961534	0.000489921	0.00328316	0	0	0
prot_000000015564	Imidazole glycerol phosphate synthase cyclase subunit (EC 4.1.3.-)	BM58_1170_1contig51	306	1040	f	0.134287	0.181212	0.00442213	0.000493569	0.00325722	0	0	0
prot_000000014803	Type IV fimbrial assembly, ATPase PilB	BM58_1170_1contig748	1226	1585	f	0.124021	0.128921	0.00440435	0.000820763	0.00324761	0	0	0
prot_000000006463	Putative permease PerM (= YfgO)	BM58_1170_1contig514	32	1015	r	0.135419	0.114454	0.00705465	0.000961901	0.00320676	0	0	0
prot_000000008291	Dihydroxy-acid dehydratase (EC 4.2.1.9)	BM58_1170_1contig193	1232	2218	f	0.135767	0.175322	0.00478375	0.000244949	0.00319909	0	0	0
prot_000000006409	Peptide deformylase (EC 3.5.1.88)	BM58_1170_1contig128	12	131	r	0.0875662	0.0890168	0.00168159	0	0.00319413	0	0	0
prot_000000010099	Carbamoyl-phosphate synthase large chain (EC 6.3.5.5)	BM58_1170_1contig988	40	699	r	0.101099	0.142551	0.00377544	0	0.00319017	0	0	0
prot_000000002248	Thymidylate kinase (EC 2.7.4.9)	BM58_1170_1contig561	569	961	f	0.128037	0.0939403	0.0107055	0.000147869	0.00315635	0	0	0
prot_000000002881	Response regulator	BM58_1170_1contig424	1266	1648	r	0.171055	0.149072	0.00119253	3.7935e-05	0.00309853	0	0	0
prot_000000002475	Phosphoenolpyruvate carboxykinase [ATP] (EC 4.1.1.49)	BM58_1170_1contig1014	3	551	f	0.0958083	0.129243	0.00222425	0	0.00308475	0	0	0
prot_000000013395	Phosphoadenylyl-sulfate reductase [thioredoxin] (EC 1.8.4.8) / Adenylyl-sulfate reductase [thioredoxin] (EC 1.8.4.10)	BM58_1170_1contig276	1902	2369	r	0.13268	0.0964183	0.0061842	0	0.00307099	0	0	0
prot_000000009841	Lysyl-tRNA synthetase (class II) (EC 6.1.1.6)	BM58_1170_1contig145	1648	3168	r	0.149359	0.145502	0.00546812	0.000237547	0.00303936	0	0	0
prot_000000004082	Fe-S OXIDOREDUCTASE (1.8.-.-)	BM58_1170_1contig294	157	1329	r	0.117245	0.114083	0.00367565	0	0.0030305	0	0	0
prot_000000010989	Ribosomal large subunit pseudouridine synthase D (EC 4.2.1.70)	BM58_1170_1contig620	1698	1808	r	0.0758249	0.0999626	0.00775848	0	0.003009	0	0	0
prot_000000004369	Lipoprotein releasing system transmembrane protein LolC	BM58_1170_1contig624	127	1080	r	0.116777	0.101559	0.0077672	0.000126715	0.0029985	0	0	0
prot_000000001656	Soluble pyridine nucleotide transhydrogenase (EC 1.6.1.1)	BM58_1170_1contig194	91	1482	r	0.143815	0.113826	0.00553313	0.000138036	0.00298388	0	0	0
prot_000000006383	Excinuclease ABC subunit B	BM58_1170_1contig307	718	1137	f	0.119481	0.0781835	0.010342	0.00143817	0.00295493	0	0	0
prot_000000001159	1-hydroxy-2-methyl-2-(E)-butenyl 4-diphosphate synthase (EC 1.17.7.1)	BM58_1170_1contig270	54	869	f	0.130069	0.164416	0.00315083	0.000294861	0.00294667	0	0	0
prot_000000009454	GTP-binding and nucleic acid-binding protein YchF	BM58_1170_1contig1046	130	1221	f	0.134354	0.189072	0.00699632	0.000332062	0.00294341	0	0	0
prot_000000016494	Nitrogen regulation protein NtrB (EC 2.7.13.3)	BM58_1170_1contig331	76	657	r	0.177251	0.221454	0.00733175	0.00101638	0.00294292	0	0	0
prot_000000003574	NAD synthetase (EC 6.3.1.5) / Glutamine amidotransferase chain of NAD synthetase	BM58_1170_1contig260	31	726	f	0.101641	0.115774	0.0074492	0.000797536	0.00293941	0	0	0
prot_000000014794	Membrane alanine aminopeptidase N (EC 3.4.11.2)	BM58_1170_1contig248	67	2625	f	0.159089	0.129113	0.00928528	0.000203941	0.00293879	0	0	0
prot_000000005642	UDP-N-acetylglucosamine 2-epimerase (EC 5.1.3.14)	BM58_1170_1contig79	15853	16977	f	0.169245	0.0763347	0.00215054	0.00522576	0.00293557	0	0	0
prot_000000001829	Exodeoxyribonuclease I (EC 3.1.11.1)	BM58_1170_1contig329	105	1025	r	0.132961	0.13627	0.00666701	0.00142549	0.00292438	0	0	0
prot_000000007792	Hydroxymethylpyrimidine phosphate synthase ThiC (EC 4.1.99.17)	BM58_1170_1contig308	587	790	f	0.13376	0.119767	0.00396706	0.000202258	0.00291943	0	0	0
prot_000000005055	Peptide chain release factor 3	BM58_1170_1contig598	130	1299	f	0.127471	0.15318	0.00706353	0.000103302	0.00290941	0	0	0
prot_000000007297	Multimodular transpeptidase-transglycosylase (EC 2.4.1.129) (EC 3.4.-.-)	BM58_1170_1contig244	1318	3255	f	0.12121	0.140888	0.00416005	0.000374062	0.00290811	0	0	0
prot_000000011608	Anhydro-N-acetylmuramic acid kinase (EC 2.7.1.-)	BM58_1170_1contig49	85	597	r	0.111034	0.160675	0.00375064	0	0.0028704	0	0	0
prot_000000003470	Putative transport protein	BM58_1170_1contig1136	405	1112	f	0.0862468	0.125493	0.00626226	0	0.00280605	0	0	0
prot_000000011094	IMP cyclohydrolase (EC 3.5.4.10) / Phosphoribosylaminoimidazolecarboxamide formyltransferase (EC 2.1.2.3)	BM58_1170_1contig521	1276	1563	r	0.0590676	0.0792376	0.00209764	0	0.00280266	0	0	0
prot_000000011180	Phosphoribosylamine--glycine ligase (EC 6.3.4.13)	BM58_1170_1contig521	4	1131	r	0.0975458	0.137587	0.00650913	0.000107152	0.00280252	0	0	0
prot_000000003520	Uracil-DNA glycosylase, family 1	BM58_1170_1contig145	195	599	r	0.135799	0.136519	0.00506549	0.000597821	0.00278576	0	0	0
prot_000000006822	Malonyl CoA-acyl carrier protein transacylase (EC 2.3.1.39)	BM58_1170_1contig464	1657	2058	r	0.123842	0.0854706	0.00441511	0	0.00276749	0	0	0
prot_000000002793	Recombination protein RecR	BM58_1170_1contig355	921	1172	r	0.0925754	0.103339	0.00631127	0	0.00269656	0	0	0
prot_000000001649	Protein involved in catabolism of external DNA	BM58_1170_1contig544	393	854	f	0.175932	0.171611	0.00258653	0.000248854	0.00268482	0	0	0
prot_000000010703	Phosphatidylserine decarboxylase (EC 4.1.1.65)	BM58_1170_1contig395	46	738	r	0.182787	0.184801	0.0064507	0.000684073	0.0026808	0	0	0
prot_000000010687	3-dehydroquinate synthase (EC 4.2.3.4)	BM58_1170_1contig31	3	764	r	0.137499	0.17001	0.00397359	0.00174554	0.00261724	0	0	0
prot_000000000406	Nitrite reductase [NAD(P)H] small subunit (EC 1.7.1.4)	BM58_1170_1contig46	1296	1403	r	0.109442	0.147221	0.00530149	5.64298e-05	0.00260352	0	0	0
prot_000000001936	DNA primase (EC 2.7.7.-)	BM58_1170_1contig974	247	1434	f	0.106606	0.147613	0.00441051	0.000143447	0.00259166	0	0	0
prot_000000010946	Anaerobic dimethyl sulfoxide reductase chain B (EC 1.8.5.3)	BM58_1170_1contig1144	13	957	f	0.0932282	0.112766	0.00645866	0	0.00258509	0	0	0
prot_000000010899	Twin-arginine translocation protein TatC	BM58_1170_1contig639	9	503	f	0.16189	0.186496	0.00730989	0	0.00256646	0	0	0
prot_000000011477	Phosphoribosylglycinamide formyltransferase (EC 2.1.2.2)	BM58_1170_1contig53	1796	2086	f	0.065889	0.0689559	0.00400058	0	0.00250754	0	0	0
prot_000000000129	Aspartyl-tRNA synthetase (EC 6.1.1.12) @ Aspartyl-tRNA(Asn) synthetase (EC 6.1.1.23)	BM58_1170_1contig881	1	1089	r	0.119617	0.115958	0.00668069	0.000554962	0.00249065	0	0	0
prot_000000003431	Transcription termination factor Rho	BM58_1170_1contig720	3	785	r	0.153912	0.182507	0.00490374	0.000166778	0.00248732	0	0	0
prot_000000000910	Glycerol-3-phosphate dehydrogenase [NAD(P)+] (EC 1.1.1.94)	BM58_1170_1contig839	29	799	r	0.128326	0.106893	0.00405213	0.000784154	0.00247087	0	0	0
prot_000000016647	tRNA pseudouridine 13 synthase (EC 4.2.1.-)	BM58_1170_1contig1263	547	1095	f	0.133535	0.141983	0.00693501	1.32219e-05	0.00246494	0	0	0
prot_000000008470	Twitching motility protein PilT	BM58_1170_1contig60	1953	4104	f	0.119312	0.160745	0.00539175	5.61412e-05	0.00244822	0	0	0
prot_000000004280	FIG004453: protein YceG like	BM58_1170_1contig561	75	458	f	0.121951	0.0915607	0.00420695	0	0.00242451	0	0	0
prot_000000010460	Methylcrotonyl-CoA carboxylase carboxyl transferase subunit (EC 6.4.1.4)	BM58_1170_1contig724	199	1335	r	0.122889	0.092447	0.00673336	0.000848295	0.0023974	0	0	0
prot_000000009703	YaeQ protein	BM58_1170_1contig76	1472	1693	f	0.135774	0.149497	0.00681694	0	0.00237539	0	0	0
prot_000000008453	Adenosylhomocysteinase (EC 3.3.1.1)	BM58_1170_1contig261	2	667	f	0.139391	0.190685	0.00568585	0	0.00237507	0	0	0
prot_000000000575	tRNA pseudouridine synthase A (EC 4.2.1.70)	BM58_1170_1contig15	1518	2234	r	0.116627	0.106721	0.0102849	0.000168659	0.00234885	0	0	0
prot_000000012985	ADP-heptose synthase (EC 2.7.-.-) / D-glycero-beta-D-manno-heptose 7-phosphate kinase	BM58_1170_1contig784	91	1176	r	0.0907237	0.121692	0.00466005	0	0.00232827	0	0	0
prot_000000005948	Cytochrome c heme lyase subunit CcmF	BM58_1170_1contig122	591	1169	f	0.107716	0.119096	0.00703203	0.000417854	0.002327	0	0	0
prot_000000009830	General secretion pathway protein E	BM58_1170_1contig105	1051	2058	f	0.0908691	0.0868799	0.0065735	0.000359761	0.00230574	0	0	0
prot_000000005066	Transcription accessory protein (S1 RNA-binding domain)	BM58_1170_1contig732	6	920	f	0.108496	0.162333	0.00518888	0	0.00227169	0	0	0
prot_000000012264	Exodeoxyribonuclease V alpha chain (EC 3.1.11.5)	BM58_1170_1contig855	1038	1112	r	0.0758664	0.0941569	0.011023	0	0.0022643	0	0	0
prot_000000015826	Xaa-Pro aminopeptidase (EC 3.4.11.9)	BM58_1170_1contig665	22	1155	f	0.127573	0.166914	0.00405775	0.000425271	0.00226423	0	0	0
prot_000000004034	MotA/TolQ/ExbB proton channel family protein	BM58_1170_1contig692	54	497	r	0.129336	0.104623	0.00576079	0	0.00225358	0	0	0
prot_000000011125	tRNA pseudouridine synthase B (EC 4.2.1.70)	BM58_1170_1contig218	733	1191	f	0.126703	0.187681	0.00455804	0	0.00217616	0	0	0
prot_000000005353	Acriflavin resistance protein	BM58_1170_1contig364	191	433	r	0.109773	0.104778	0.00601253	0	0.00217608	0	0	0
prot_000000011282	N-succinyl-L,L-diaminopimelate desuccinylase (EC 3.5.1.18)	BM58_1170_1contig518	1030	1191	f	0.053252	0.0616343	0.00289136	0	0.00216863	0	0	0
prot_000000010521	Aspartate-semialdehyde dehydrogenase (EC 1.2.1.11)	BM58_1170_1contig274	985	1314	f	0.098864	0.0832484	0.00296772	0	0.00216012	0	0	0
prot_000000000697	SAM-dependent methyltransferase SCO3452 (UbiE paralog)	BM58_1170_1contig346	77	505	f	0.130864	0.0867917	0.00396621	0	0.00214742	0	0	0
prot_000000013425	Short-chain alcohol dehydrogenase family	BM58_1170_1contig32	223	1338	f	0.115673	0.105165	0.00542879	0	0.00213755	0	0	0
prot_000000003594	Fumarate and nitrate reduction regulatory protein	BM58_1170_1contig306	182	571	f	0.126692	0.108309	0.00725964	0.000931309	0.00213461	0	0	0
prot_000000013504	Ribosomal large subunit pseudouridine synthase D (EC 4.2.1.70)	BM58_1170_1contig260	1853	2290	f	0.100705	0.118785	0.00732812	0.000875992	0.00213152	0	0	0
prot_000000009968	DNA recombination protein RmuC	BM58_1170_1contig203	2	676	f	0.131746	0.125833	0.00204872	0	0.00211129	0	0	0
prot_000000012168	N-acetylneuraminate synthase (EC 2.5.1.56)	BM58_1170_1contig79	4387	5232	f	0.157111	0.0684332	0.00464576	0.00300828	0.00209137	0	0	0
prot_000000008733	Ribosomal RNA small subunit methyltransferase E (EC 2.1.1.-)	BM58_1170_1contig731	110	796	f	0.123017	0.157762	0.00604237	0	0.00208579	0	0	0
prot_000000005690	Phosphoenolpyruvate-protein phosphotransferase, nitrogen regulation associated	BM58_1170_1contig241	572	625	r	0.154412	0.204226	0.00481955	0	0.0020791	0	0	0
prot_000000013326	Branched-chain amino acid aminotransferase (EC 2.6.1.42)	BM58_1170_1contig340	908	1162	f	0.177218	0.194752	0.00598803	0	0.0020554	0	0	0
prot_000000003920	Imidazole glycerol phosphate synthase amidotransferase subunit (EC 2.4.2.-)	BM58_1170_1contig51	3	275	f	0.10957	0.135091	0.00580764	0	0.00205291	0	0	0
prot_000000012731	ABC transporter, periplasmic spermidine putrescine-binding protein PotD (TC 3.A.1.11.1)	BM58_1170_1contig193	4	660	f	0.202391	0.1752	0.0105822	0	0.00205157	0	0	0
prot_000000015579	UDP-N-acetylglucosamine 4,6-dehydratase (EC 4.2.1.-)	BM58_1170_1contig79	13776	14669	f	0.145933	0.0681391	0.00288773	0.00840045	0.00204042	0	0	0
prot_000000000578	Mercuric ion reductase (EC 1.16.1.1)	BM58_1170_1contig245	669	1391	r	0.135127	0.172127	0.00541343	3.17789e-05	0.00203838	0	0	0
prot_000000013823	COG0613, Predicted metal-dependent phosphoesterases (PHP family)	BM58_1170_1contig341	885	1601	r	0.0861198	0.0961627	0.00272377	0	0.00203298	0	0	0
prot_000000000711	tRNA(Cytosine32)-2-thiocytidine synthetase	BM58_1170_1contig306	1507	2136	f	0.124893	0.0945856	0.00509494	0.00197747	0.0020281	0	0	0
prot_000000014101	Electron transfer flavoprotein-ubiquinone oxidoreductase (EC 1.5.5.1)	BM58_1170_1contig54	3	197	f	0.112951	0.0739289	0.00308027	0.0023405	0.00202523	0	0	0
prot_000000016434	DNA polymerase I (EC 2.7.7.7)	BM58_1170_1contig110	666	1232	f	0.149959	0.185069	0.0127334	0	0.00202342	0	0	0
prot_000000012692	Electron transport complex protein RnfG	BM58_1170_1contig454	1803	1871	r	0.0393045	0.0408457	0.00229126	0	0.00202104	0	0	0
prot_000000000905	Phosphonate ABC transporter phosphate-binding periplasmic component (TC 3.A.1.9.1)	BM58_1170_1contig468	1211	1318	f	0.127731	0.162402	0.00331838	0.000948021	0.00200953	0	0	0
prot_000000010220	Thiamin biosynthesis lipoprotein ApbE	BM58_1170_1contig194	2005	2562	r	0.0971696	0.0806342	0.005231	0	0.00200796	0	0	0
prot_000000004860	Ferric iron ABC transporter, permease protein	BM58_1170_1contig265	894	1466	f	0.099076	0.128823	0.00283728	0	0.00197117	0	0	0
prot_000000001132	rRNA small subunit methyltransferase I	BM58_1170_1contig161	1119	1910	r	0.119187	0.122851	0.00422621	0.000337395	0.00196544	0	0	0
prot_000000010036	Chemotaxis protein CheV (EC 2.7.3.-)	BM58_1170_1contig63	96	953	r	0.131266	0.100411	0.00571753	0.00246451	0.00196192	0	0	0
prot_000000003893	Phosphocarrier protein, nitrogen regulation associated	BM58_1170_1contig403	809	862	r	0.132503	0.140971	0.00235978	0	0.00193894	0	0	0
prot_000000008266	2-C-methyl-D-erythritol 2,4-cyclodiphosphate synthase (EC 4.6.1.12)	BM58_1170_1contig1263	139	429	f	0.128089	0.12833	0.00729285	0	0.00192121	0	0	0
prot_000000004649	Histidyl-tRNA synthetase (EC 6.1.1.21)	BM58_1170_1contig270	1043	1930	f	0.133487	0.177706	0.0055361	0.000136144	0.00190673	0	0	0
prot_000000003805	ATP-dependent DNA helicase RecQ	BM58_1170_1contig886	446	2203	f	0.0966169	0.10508	0.00364469	0.00016839	0.0018944	0	0	0
prot_000000014634	Glutamate synthase [NADPH] large chain (EC 1.4.1.13)	BM58_1170_1contig48	501	1256	f	0.133722	0.185949	0.00649446	0	0.00188587	0	0	0
prot_000000005771	Phosphoenolpyruvate synthase (EC 2.7.9.2)	BM58_1170_1contig313	1	1677	r	0.122638	0.0959282	0.00549593	7.20524e-05	0.00188328	0	0	0
prot_000000006187	2,3-bisphosphoglycerate-independent phosphoglycerate mutase (EC 5.4.2.1)	BM58_1170_1contig601	1123	1401	f	0.127477	0.17216	0.00468034	0	0.00186757	0	0	0
prot_000000006123	Lipopolysaccharide ABC transporter, ATP-binding protein LptB	BM58_1170_1contig185	794	1501	f	0.154844	0.184159	0.00693688	0.000170806	0.00186447	0	0	0
prot_000000000641	Hypothetical YciO protein, TsaC/YrdC paralog	BM58_1170_1contig341	242	811	r	0.137572	0.132142	0.00893074	0	0.00186261	0	0	0
prot_000000004465	COG0553: Superfamily II DNA/RNA helicases, SNF2 family	BM58_1170_1contig399	95	532	f	0.101964	0.133381	0.00269705	0	0.00185859	0	0	0
prot_000000011524	Leucyl-tRNA synthetase (EC 6.1.1.4)	BM58_1170_1contig77	41	2314	r	0.126793	0.175987	0.00685406	0.000106256	0.00185835	0	0	0
prot_000000014305	Nudix-like NDP and NTP phosphohydrolase YmfB	BM58_1170_1contig434	180	353	f	0.100726	0.0770009	0.00263076	2.79213e-05	0.00185598	0	0	0
prot_000000000688	Acetyl-coenzyme A carboxyl transferase alpha chain (EC 6.4.1.2) / Acetyl-coenzyme A carboxyl transferase beta chain (EC 6.4.1.2) / Biotin carboxylase of acetyl-CoA carboxylase (EC 6.3.4.14) / Biotin carboxyl carrier protein of acetyl-CoA carboxylase	BM58_1170_1contig146	57	2957	f	0.163684	0.130379	0.00925418	0.000415164	0.00183967	0	0	0
prot_000000006531	Glutaminyl-tRNA synthetase (EC 6.1.1.18)	BM58_1170_1contig332	3	833	r	0.0966034	0.0961871	0.00448581	0.000145494	0.00182535	0	0	0
prot_000000012061	Polyphosphate kinase (EC 2.7.4.1)	BM58_1170_1contig473	207	2069	f	0.133616	0.16943	0.00464296	3.3076e-05	0.00181994	0	0	0
prot_000000008865	ABC transporter (iron.B12.siderophore.hemin) , periplasmic substrate-binding component	BM58_1170_1contig236	669	923	f	0.135493	0.115608	0.022409	0	0.00180843	0	0	0
prot_000000004278	Molybdenum cofactor biosynthesis protein MoaC	BM58_1170_1contig816	1119	1580	r	0.0928873	0.0991072	0.00334386	0	0.00175288	0	0	0
prot_000000001299	COG0398: uncharacterized membrane protein / PF00070 family, FAD-dependent NAD(P)-disulphide oxidoreductase	BM58_1170_1contig245	543	2273	r	0.128009	0.165325	0.00467104	0.000115874	0.001741	0	0	0
prot_000000009941	Thiosulfate sulfurtransferase, rhodanese (EC 2.8.1.1)	BM58_1170_1contig395	940	1371	r	0.11263	0.141432	0.00270263	0	0.00171977	0	0	0
prot_000000009458	Positive regulator of CheA protein activity (CheW)	BM58_1170_1contig72	561	992	r	0.159816	0.120009	0.00849889	0.00314928	0.00171881	0	0	0
prot_000000015888	D-2-hydroxyglutarate dehydrogenase	BM58_1170_1contig173	829	1167	f	0.0878618	0.121217	0.00384512	0	0.001696	0	0	0
prot_000000001109	LppC putative lipoprotein	BM58_1170_1contig161	2738	3487	f	0.105927	0.11735	0.00284603	0	0.00166735	0	0	0
prot_000000001115	Prolyl-tRNA synthetase (EC 6.1.1.15), bacterial type	BM58_1170_1contig768	71	1729	r	0.0863407	0.0841651	0.00459184	0	0.00166028	0	0	0
prot_000000003732	L-carnitine dehydratase/bile acid-inducible protein F	BM58_1170_1contig51	1152	2207	r	0.114958	0.160073	0.00581087	0	0.00165943	0	0	0
prot_000000002926	Dethiobiotin synthetase (EC 6.3.3.3)	BM58_1170_1contig1111	567	863	f	0.0973551	0.102489	0.00304435	0	0.00165222	0	0	0
prot_000000012837	Mobile element protein	BM58_1170_1contig269	2118	2321	r	0.361357	0.408122	0.011283	0.00208207	0.00164269	0	0	0
prot_000000010278	Type IV pilus biogenesis protein PilZ	BM58_1170_1contig63	1064	1399	r	0.135353	0.0972974	0.0057298	0.00102375	0.00163727	0	0	0
prot_000000016595	Periplasmic protease	BM58_1170_1contig874	186	971	r	0.145133	0.112445	0.00472541	0.000461502	0.00162506	0	0	0
prot_000000015109	Potassium uptake protein TrkH	BM58_1170_1contig490	165	1586	f	0.11685	0.180817	0.00463403	0.000225203	0.00162265	0	0	0
prot_000000015372	DNA polymerase III alpha subunit (EC 2.7.7.7)	BM58_1170_1contig910	63	644	r	0.117257	0.121004	0.0111321	0	0.00161673	0	0	0
prot_000000008446	Transcriptional regulator, LysR family	BM58_1170_1contig70	28	885	r	0.0862876	0.0730542	0.00641432	0	0.00161615	0	0	0
prot_000000014120	Metal-dependent hydrolase YbeY, involved in rRNA and/or ribosome maturation and assembly	BM58_1170_1contig174	916	1179	f	0.12053	0.167046	0.00630621	0.000275498	0.00161002	0	0	0
prot_000000008431	Capsular polysaccharide export system periplasmic protein KpsD	BM58_1170_1contig5	7824	9185	r	0.116914	0.097689	0.00362267	0.00114016	0.00160534	0	0	0
prot_000000005297	2-isopropylmalate synthase (EC 2.3.3.13)	BM58_1170_1contig43	2107	2331	r	0.0710184	0.100344	0.00479132	0	0.00158081	0	0	0
prot_000000005232	TRAP transporter solute receptor, unknown substrate 6	BM58_1170_1contig11	1	336	f	0.0990921	0.135765	0.00370744	0	0.00155719	0	0	0
prot_000000005212	Acyl-CoA dehydrogenase, short-chain specific (EC 1.3.99.2)	BM58_1170_1contig93	278	1147	r	0.148014	0.116294	0.00668141	0	0.00154824	0	0	0
prot_000000014785	Ubiquinone biosynthesis monooxygenase UbiB	BM58_1170_1contig82	904	2187	f	0.0956688	0.147029	0.00386918	0.000281428	0.00153759	0	0	0
prot_000000014829	Endonuclease III (EC 4.2.99.18)	BM58_1170_1contig454	364	981	r	0.0866529	0.0843593	0.0040582	0	0.0015351	0	0	0
prot_000000008918	YcgN (Fragment)	BM58_1170_1contig896	528	860	f	0.16106	0.132722	0.00773537	0	0.00153024	0	0	0
prot_000000011270	Cobyric acid synthase (EC 6.3.5.10)	BM58_1170_1contig929	11	550	r	0.086168	0.126406	0.00330516	0	0.00150458	0	0	0
prot_000000002063	tRNA:Cm32/Um32 methyltransferase	BM58_1170_1contig518	161	781	f	0.0754425	0.0739363	0.00388334	0	0.00150172	0	0	0
prot_000000009529	Bacillosamine/Legionaminic acid biosynthesis aminotransferase PglE; 4-keto-6-deoxy-N-Acetyl-D-hexosaminyl-(Lipid carrier) aminotransferase	BM58_1170_1contig79	660	1199	f	0.124655	0.0619533	0.0061431	0.00253394	0.00149232	0	0	0
prot_000000003046	Electron transport complex protein RnfE	BM58_1170_1contig454	989	1663	r	0.0871334	0.0925985	0.00488907	0	0.00148794	0	0	0
prot_000000011601	D-glycero-D-manno-heptose 1-phosphate guanosyltransferase	BM58_1170_1contig79	6255	6869	f	0.151823	0.0707512	0.00189608	0.00490906	0.00148077	0	0	0
prot_000000013140	4-hydroxybenzoate polyprenyltransferase (EC 2.5.1.39)	BM58_1170_1contig259	90	671	r	0.135836	0.181618	0.00822965	0	0.00147963	0	0	0
prot_000000006166	Glutathione-regulated potassium-efflux system ATP-binding protein	BM58_1170_1contig581	297	917	f	0.16556	0.208719	0.00402797	0	0.00147642	0	0	0
prot_000000012018	Aspartyl-tRNA(Asn) amidotransferase subunit C (EC 6.3.5.6) @ Glutamyl-tRNA(Gln) amidotransferase subunit C (EC 6.3.5.7)	BM58_1170_1contig362	1767	1925	f	0.218786	0.227898	0.00445293	0.000191076	0.0014732	0	0	0
prot_000000011569	Flagellar motor rotation protein MotB	BM58_1170_1contig296	1245	1424	r	0.0729687	0.105291	0.00193151	0	0.00145484	0	0	0
prot_000000013336	GTP pyrophosphokinase (EC 2.7.6.5), (p)ppGpp synthetase I	BM58_1170_1contig943	295	1542	f	0.129244	0.13174	0.00641279	0.00025469	0.00144662	0	0	0
prot_000000003719	5-methyltetrahydrofolate--homocysteine methyltransferase (EC 2.1.1.13)	BM58_1170_1contig142	27	1231	r	0.10024	0.0843179	0.00427482	0.000199595	0.0014383	0	0	0
prot_000000009463	tRNA-specific 2-thiouridylase MnmA	BM58_1170_1contig434	652	1494	f	0.111661	0.0864141	0.0121166	0	0.00143712	0	0	0
prot_000000008171	Multimodular transpeptidase-transglycosylase (EC 2.4.1.129) (EC 3.4.-.-)	BM58_1170_1contig421	26	394	r	0.186702	0.159595	0.00334445	0.000203454	0.00143438	0	0	0
prot_000000014145	Phosphate starvation-inducible protein PhoH, predicted ATPase	BM58_1170_1contig174	113	724	f	0.132254	0.193077	0.0113533	0.000790571	0.0014313	0	0	0
prot_000000016033	Protein of unknown function DUF81	BM58_1170_1contig90	16	648	f	0.0517745	0.0750033	0.00372743	0	0.00142945	0	0	0
prot_000000007181	Porphobilinogen synthase (EC 4.2.1.24)	BM58_1170_1contig473	11	115	f	0.0769652	0.0753555	0.00170196	0.000104504	0.00142066	0	0	0
prot_000000005813	Periplasmic serine proteases (ClpP class)	BM58_1170_1contig225	215	898	r	0.0941437	0.0798411	0.00385568	0.000176808	0.00141637	0	0	0
prot_000000002209	ATP-dependent RNA helicase HrpA (EC 3.6.4.13)	BM58_1170_1contig75	1777	3930	f	0.115501	0.0836332	0.00442431	0.000649512	0.00140968	0	0	0
prot_000000007954	DnaK-related protein	BM58_1170_1contig404	998	1174	f	0.134394	0.157259	0.00213185	2.74454e-05	0.00140695	0	0	0
prot_000000015231	DNA polymerase IV (EC 2.7.7.7)	BM58_1170_1contig450	20	895	f	0.140093	0.106678	0.00645244	0	0.00136782	0	0	0
prot_000000008810	Polyhydroxyalkanoic acid synthase	BM58_1170_1contig206	1016	1246	r	0.150648	0.120879	0.00461288	0.00717208	0.00135475	0	0	0
prot_000000005470	3-isopropylmalate dehydratase large subunit (EC 4.2.1.33)	BM58_1170_1contig57	63	671	f	0.0757301	0.0659053	0.0070982	0	0.00134401	0	0	0
prot_000000001517	Two-component sensor CbrA: intrcellular carbon:nitrogen balance	BM58_1170_1contig642	418	2475	f	0.0938097	0.135428	0.00544595	0	0.0013264	0	0	0
prot_000000008916	Mobile element protein	BM58_1170_1contig838	368	1096	f	0.155657	0.159968	0.0031567	0.000495978	0.00132202	0	0	0
prot_000000000102	Ribonuclease HI (EC 3.1.26.4)	BM58_1170_1contig409	979	1284	f	0.102538	0.082081	0.0012274	0	0.0013166	0	0	0
prot_000000004998	Chromosome partition protein smc	BM58_1170_1contig469	4	102	f	0.0609734	0.0577884	0.0017802	0	0.00130971	0	0	0
prot_000000015417	Folate-dependent protein for Fe/S cluster synthesis/repair in oxidative stress	BM58_1170_1contig213	1794	2429	r	0.119236	0.12689	0.00877031	2.28207e-05	0.00130246	0	0	0
prot_000000003081	Butyryl-CoA dehydrogenase (EC 1.3.99.2)	BM58_1170_1contig93	272	766	r	0.149392	0.122207	0.00447991	0	0.00130244	0	0	0
prot_000000005968	FIG00786500: hypothetical protein	BM58_1170_1contig66	1456	1824	f	0.162513	0.231535	0.00404721	0	0.00128858	0	0	0
prot_000000009801	Nitrite reductase [NAD(P)H] large subunit (EC 1.7.1.4)	BM58_1170_1contig566	37	729	f	0.111242	0.155662	0.00545206	0.000523525	0.00128642	0	0	0
prot_000000015721	Hypothetical protein YggS, proline synthase co-transcribed bacterial homolog PROSC	BM58_1170_1contig60	1105	1671	r	0.123331	0.167244	0.00598489	0	0.00128478	0	0	0
prot_000000015425	Kef-type K+ transport system, predicted NAD-binding component	BM58_1170_1contig812	417	761	f	0.16882	0.201392	0.00598413	0	0.00128131	0	0	0
prot_000000005559	3-isopropylmalate dehydrogenase (EC 1.1.1.85)	BM58_1170_1contig274	84	935	f	0.108128	0.0988465	0.00372074	0.000283807	0.00127449	0	0	0
prot_000000010042	Response regulator	BM58_1170_1contig775	746	1234	f	0.126501	0.155872	0.00319751	0	0.00126518	0	0	0
prot_000000007490	Lipid A export ATP-binding/permease protein MsbA	BM58_1170_1contig715	190	1104	f	0.107249	0.0841223	0.00532386	0	0.00126385	0	0	0
prot_000000011348	Lipopolysaccharide biosynthesis protein RffA	BM58_1170_1contig271	152	1219	r	0.166707	0.0839481	0.00425272	0.000847695	0.0012621	0	0	0
prot_000000016309	Cysteine synthase (EC 2.5.1.47)	BM58_1170_1contig227	1203	1985	r	0.0971169	0.0984436	0.00614282	0	0.00125659	0	0	0
prot_000000007046	4-hydroxy-2-oxovalerate aldolase (EC 4.1.3.39)	BM58_1170_1contig5	3199	3894	r	0.113859	0.0983241	0.00560025	0.00034751	0.00124227	0	0	0
prot_000000015892	Survival protein SurA precursor (Peptidyl-prolyl cis-trans isomerase SurA) (EC 5.2.1.8)	BM58_1170_1contig608	167	682	r	0.160828	0.170131	0.00675703	0.00046897	0.00123812	0	0	0
prot_000000000209	[Protein-PII] uridylyltransferase (EC 2.7.7.59)	BM58_1170_1contig1297	45	1415	f	0.153286	0.13877	0.00863673	0	0.0012351	0	0	0
prot_000000006924	UDP-N-acetylglucosamine 4,6-dehydratase (EC 4.2.1.-)	BM58_1170_1contig79	2	52	f	0.155956	0.0904711	0.00193326	0	0.00122986	0	0	0
prot_000000010613	Protease III precursor (EC 3.4.24.55)	BM58_1170_1contig567	619	1155	f	0.115999	0.10294	0.00783655	0	0.00122195	0	0	0
prot_000000005062	50S ribosomal subunit maturation GTPase RbgA (B. subtilis YlqF)	BM58_1170_1contig626	1	780	r	0.100566	0.0785798	0.00512889	0	0.00121957	0	0	0
prot_000000007458	Lactoylglutathione lyase (EC 4.4.1.5)	BM58_1170_1contig454	8	340	r	0.068582	0.0645466	0.00513541	0	0.00121823	0	0	0
prot_000000008078	UDP-N-acetylmuramoylalanine--D-glutamate ligase (EC 6.3.2.9)	BM58_1170_1contig741	205	1191	f	0.110982	0.118904	0.00351208	0	0.00121803	0	0	0
prot_000000015410	tRNA pseudouridine synthase C (EC 4.2.1.70)	BM58_1170_1contig586	741	1226	r	0.112714	0.117608	0.00605215	0	0.00121769	0	0	0
prot_000000009886	Isovaleryl-CoA dehydrogenase (EC 1.3.8.4)	BM58_1170_1contig643	533	1579	f	0.152545	0.126176	0.00831263	0	0.00121681	0	0	0
prot_000000016857	3-ketoacyl-CoA thiolase (EC 2.3.1.16) @ Acetyl-CoA acetyltransferase (EC 2.3.1.9)	BM58_1170_1contig268	435	1250	f	0.104892	0.151661	0.0040076	0.000435624	0.00121381	0	0	0
prot_000000004158	5,10-methylenetetrahydrofolate reductase (EC 1.5.1.20)	BM58_1170_1contig261	853	1542	f	0.16398	0.194296	0.0050343	0.000524052	0.00119918	0	0	0
prot_000000016623	Radical SAM family enzyme, similar to coproporphyrinogen III oxidase, oxygen-independent, clustered with nucleoside-triphosphatase RdgB	BM58_1170_1contig130	76	1212	f	0.160239	0.189108	0.00711123	7.01597e-05	0.00119343	0	0	0
prot_000000002792	Formyltetrahydrofolate deformylase (EC 3.5.1.10)	BM58_1170_1contig472	904	1215	f	0.0953946	0.109343	0.00449998	0	0.00119034	0	0	0
prot_000000004400	Adenosylmethionine-8-amino-7-oxononanoate aminotransferase (EC 2.6.1.62)	BM58_1170_1contig232	107	1267	r	0.0957998	0.088334	0.00567413	0	0.00118261	0	0	0
prot_000000014030	FIG146278: Maf/YceF/YhdE family protein	BM58_1170_1contig257	170	502	r	0.138798	0.134365	0.00527844	0	0.0011772	0	0	0
prot_000000007156	Pantoate--beta-alanine ligase (EC 6.3.2.1)	BM58_1170_1contig131	3	494	f	0.132836	0.16447	0.00796286	0.000245947	0.00117676	0	0	0
prot_000000002867	Cobalt-zinc-cadmium resistance protein CzcA; Cation efflux system protein CusA	BM58_1170_1contig273	4	1080	f	0.145178	0.138821	0.00390765	0.000224461	0.00117598	0	0	0
prot_000000014738	CDP-abequose synthase (Fragment)	BM58_1170_1contig119	990	1262	f	0.136516	0.115988	0.0011316	0	0.00117287	0	0	0
prot_000000012746	Long-chain-fatty-acid--CoA ligase (EC 6.2.1.3)	BM58_1170_1contig75	26	976	f	0.153813	0.118342	0.00683491	0.00020847	0.00116948	0	0	0
prot_000000001736	Adenylate cyclase (EC 4.6.1.1)	BM58_1170_1contig45	398	1225	f	0.129009	0.0954872	0.00423192	0.000220492	0.00115328	0	0	0
prot_000000016538	[Protein-PII] uridylyltransferase (EC 2.7.7.59)	BM58_1170_1contig254	1211	1375	f	0.077791	0.100276	0.00207586	0	0.00115256	0	0	0
prot_000000000630	Two-component sensor CbrA: intrcellular carbon:nitrogen balance	BM58_1170_1contig1134	20	340	f	0.0845065	0.11745	0.00306113	0	0.00115171	0	0	0
prot_000000015450	Valyl-tRNA synthetase (EC 6.1.1.9)	BM58_1170_1contig381	48	1688	f	0.137926	0.199708	0.00511015	0	0.00114777	0	0	0
prot_000000004223	Chromosome partition protein smc	BM58_1170_1contig469	1087	2625	f	0.119591	0.0982199	0.00672631	9.57912e-05	0.00113427	0	0	0
prot_000000003577	Glutaredoxin	BM58_1170_1contig210	816	1037	f	0.105215	0.101335	0.00510479	0.00175949	0.0011298	0	0	0
prot_000000000693	Ribonucleotide reductase of class Ia (aerobic), alpha subunit (EC 1.17.4.1)	BM58_1170_1contig723	6	1508	r	0.106768	0.0977679	0.00481063	0.000401997	0.00112766	0	0	0
prot_000000010649	TonB system biopolymer transport component; Chromosome segregation ATPase	BM58_1170_1contig692	998	1147	r	0.120185	0.0921838	0.00367338	0	0.00112178	0	0	0
prot_000000005312	UPF0246 protein YaaA	BM58_1170_1contig338	250	888	f	0.167815	0.11539	0.00805857	0.000113567	0.00111068	0	0	0
prot_000000012939	Pyridoxine 5'-phosphate synthase (EC 2.6.99.2)	BM58_1170_1contig685	701	1276	f	0.0665367	0.0758494	0.00594835	0	0.00109026	0	0	0
prot_000000013168	Capsular polysaccharide export system inner membrane protein KpsE	BM58_1170_1contig5	9537	10544	r	0.154346	0.152371	0.00465515	0.000239841	0.00108566	0	0	0
prot_000000011093	Phosphate transport ATP-binding protein PstB (TC 3.A.1.7.1)	BM58_1170_1contig1244	554	1243	r	0.12994	0.178287	0.00555056	0	0.00107759	0	0	0
prot_000000003911	UDP-glucose 4-epimerase (EC 5.1.3.2)	BM58_1170_1contig414	1979	2395	r	0.14797	0.120241	0.00606335	0.000870864	0.0010774	0	0	0
prot_000000007555	FIG003620: Proteophosphoglycan precursor (Fragment)	BM58_1170_1contig54	503	724	r	0.17992	0.134173	0.00535322	0.000546424	0.00106818	0	0	0
prot_000000005981	Selenoprotein O and cysteine-containing homologs	BM58_1170_1contig672	3	527	r	0.0908553	0.0839589	0.00218372	0.000230458	0.00106484	0	0	0
prot_000000001552	2-hydroxy-3-oxopropionate reductase (EC 1.1.1.60)	BM58_1170_1contig56	744	1472	f	0.13146	0.133377	0.00653266	0	0.00105784	0	0	0
prot_000000000135	Ribonuclease HII (EC 3.1.26.4)	BM58_1170_1contig908	947	1288	f	0.0706431	0.0686764	0.00326549	0	0.00105294	0	0	0
prot_000000015783	Mannose-1-phosphate guanylyltransferase (GDP) (EC 2.7.7.22)	BM58_1170_1contig9	1196	2107	f	0.263236	0.21276	0.00494303	0.000591206	0.0010483	0	0	0
prot_000000003866	Flavoprotein WrbA	BM58_1170_1contig127	1358	1627	f	0.0681737	0.0730792	0.00736178	0	0.001031	0	0	0
prot_000000003296	COG1496: Uncharacterized conserved protein	BM58_1170_1contig620	676	1353	r	0.0799245	0.0973473	0.00433667	0.000178375	0.00102292	0	0	0
prot_000000009472	Mobile element protein	BM58_1170_1contig560	892	1293	f	0.343824	0.385032	0.0174797	0.000475812	0.00101993	0	0	0
prot_000000005013	Lipid A export ATP-binding/permease protein MsbA	BM58_1170_1contig243	446	1792	f	0.106407	0.0845469	0.00501933	0.000357973	0.00101981	0	0	0
prot_000000007814	N-succinyl-L,L-diaminopimelate aminotransferase alternative (EC 2.6.1.17)	BM58_1170_1contig286	800	1933	f	0.127638	0.119903	0.00489182	0.000108716	0.00101628	0	0	0
prot_000000002402	8-amino-7-oxononanoate synthase (EC 2.3.1.47)	BM58_1170_1contig67	17	826	f	0.0893872	0.113844	0.00345693	0	0.00101467	0	0	0
prot_000000000818	Short-chain dehydrogenase/reductase (SDR) superfamily	BM58_1170_1contig56	3542	3640	f	0.0640507	0.0641873	0.00112479	0.00204552	0.0010065	0	0	0
prot_000000016224	Superoxide dismutase [Fe] (EC 1.15.1.1)	BM58_1170_1contig257	746	1267	r	0.142489	0.139098	0.00467048	0	0.00100443	0	0	0
prot_000000008151	Acyl-CoA dehydrogenase (EC 1.3.8.7)	BM58_1170_1contig419	51	1112	f	0.149853	0.175652	0.00841168	0.000456406	0.00100317	0	0	0
prot_000000003068	Glucose-6-phosphate isomerase (EC 5.3.1.9)	BM58_1170_1contig414	41	1501	r	0.107152	0.0985566	0.00422683	0.00066087	0.00097749	0	0	0
prot_000000003546	diguanylate cyclase (GGDEF domain) with PAS/PAC sensor	BM58_1170_1contig426	705	1382	f	0.163972	0.13234	0.00760687	0.000189077	0.000976594	0	0	0
prot_000000006773	TRAP dicarboxylate transporter, DctM subunit, unknown substrate 6	BM58_1170_1contig252	17	1273	f	0.122702	0.1694	0.00622827	0	0.000969332	0	0	0
prot_000000004274	23S rRNA (guanine-N-2-) -methyltransferase rlmL EC 2.1.1.-)	BM58_1170_1contig828	1389	1466	r	0.0588317	0.0419169	0.00681641	0.000721422	0.000964766	0	0	0
prot_000000011123	Phosphonate ABC transporter permease protein phnE (TC 3.A.1.9.1)	BM58_1170_1contig738	38	1063	r	0.103303	0.0827379	0.00472003	0.000117814	0.000961503	0	0	0
prot_000000010019	ATP-dependent DNA helicase RecG (EC 3.6.1.-)	BM58_1170_1contig933	321	2330	f	0.0911643	0.141838	0.00497853	0.000220602	0.000943121	0	0	0
prot_000000003033	Lipid A export ATP-binding/permease protein MsbA	BM58_1170_1contig450	1577	2611	f	0.152187	0.0991849	0.00579194	0	0.000935971	0	0	0
prot_000000010241	Protein-L-isoaspartate O-methyltransferase (EC 2.1.1.77)	BM58_1170_1contig695	248	895	r	0.0697206	0.0810385	0.00247889	0	0.000919179	0	0	0
prot_000000008587	Selenoprotein O and cysteine-containing homologs	BM58_1170_1contig535	27	791	f	0.125544	0.0989139	0.00761104	0.00063225	0.000918324	0	0	0
prot_000000000584	Transcription accessory protein (S1 RNA-binding domain)	BM58_1170_1contig1014	756	1829	f	0.0930704	0.129425	0.00325181	0.000449051	0.000916183	0	0	0
prot_000000009577	Sugar/maltose fermentation stimulation protein homolog	BM58_1170_1contig827	22	612	r	0.128875	0.158774	0.00418535	0	0.000909351	0	0	0
prot_000000000924	Molybdenum cofactor biosynthesis protein MoaB	BM58_1170_1contig816	1643	2104	r	0.079383	0.0827745	0.00524709	0.000521284	0.000897925	0	0	0
prot_000000012615	Glycyl-tRNA synthetase beta chain (EC 6.1.1.14)	BM58_1170_1contig629	134	1225	f	0.135019	0.184258	0.00491946	0.000110687	0.000896528	0	0	0
prot_000000008308	TRAP dicarboxylate transporter, DctQ subunit, unknown substrate 6	BM58_1170_1contig195	236	445	r	0.15542	0.205441	0.010385	0	0.000892549	0	0	0
prot_000000012930	UDP-N-acetylmuramate:L-alanyl-gamma-D-glutamyl-meso-diaminopimelate ligase (EC 6.3.2.-)	BM58_1170_1contig592	317	1483	r	0.103422	0.129455	0.00656157	0	0.000886998	0	0	0
prot_000000009758	Phosphoribosylanthranilate isomerase (EC 5.3.1.24)	BM58_1170_1contig15	857	1420	r	0.0904033	0.0819001	0.00367784	0	0.000885521	0	0	0
prot_000000012935	Peptide methionine sulfoxide reductase MsrA (EC 1.8.4.11)	BM58_1170_1contig855	230	709	r	0.142405	0.145806	0.00958116	0	0.000881415	0	0	0
prot_000000000370	Superfamily II DNA and RNA helicases	BM58_1170_1contig478	1713	2069	r	0.152863	0.15754	0.00506609	0.00134668	0.000855552	0	0	0
prot_000000001801	Transcriptional regulator, ArsR family	BM58_1170_1contig864	484	651	f	0.146672	0.113727	0.00585548	0	0.000855066	0	0	0
prot_000000006269	Adenylate cyclase (EC 4.6.1.1)	BM58_1170_1contig929	920	1936	r	0.167283	0.203736	0.00686099	0.000118858	0.000853033	0	0	0
prot_000000004690	Porphobilinogen deaminase (EC 2.5.1.61)	BM58_1170_1contig200	612	1328	f	0.105557	0.16025	0.00725825	0	0.000850196	0	0	0
prot_000000001168	tolB protein precursor, periplasmic protein involved in the tonb-independent uptake of group A colicins	BM58_1170_1contig743	33	590	r	0.124073	0.114349	0.0163765	0	0.000843193	0	0	0
prot_000000009103	Pyrroline-5-carboxylate reductase (EC 1.5.1.2)	BM58_1170_1contig60	345	1043	r	0.0656793	0.0982966	0.00457519	0	0.000842558	0	0	0
prot_000000008018	MG(2+) CHELATASE FAMILY PROTEIN / ComM-related protein	BM58_1170_1contig22	90	512	r	0.0628055	0.0914076	0.00434158	0	0.000838124	0	0	0
prot_000000012962	Butyryl-CoA dehydrogenase (EC 1.3.99.2)	BM58_1170_1contig181	562	918	f	0.153934	0.163654	0.00775038	0.000339213	0.000831207	0	0	0
prot_000000000257	Tryptophan synthase beta chain (EC 4.2.1.20)	BM58_1170_1contig15	13	807	r	0.0880195	0.0786002	0.00545702	0.000267679	0.000828529	0	0	0
prot_000000000255	Type II secretory pathway, ATPase PulE/Tfp pilus assembly pathway, ATPase PilB	BM58_1170_1contig452	54	743	r	0.122587	0.186241	0.00837061	0	0.000821817	0	0	0
prot_000000007134	rRNA small subunit 7-methylguanosine (m7G) methyltransferase GidB	BM58_1170_1contig707	1422	1952	r	0.125033	0.203116	0.00423961	0.000136709	0.000818403	0	0	0
prot_000000013044	Isovaleryl-CoA dehydrogenase (EC 1.3.8.4)	BM58_1170_1contig181	229	1383	f	0.16181	0.179898	0.0062435	0.000835063	0.000800734	0	0	0
prot_000000015813	Flagellar motor rotation protein MotB	BM58_1170_1contig422	1923	2372	f	0.136245	0.159964	0.00945461	7.53068e-05	0.000799674	0	0	0
prot_000000011931	Excinuclease ABC subunit C	BM58_1170_1contig229	564	2282	r	0.0949863	0.0831414	0.00374322	7.02909e-05	0.000796344	0	0	0
prot_000000005279	Methylmalonyl-CoA mutase (EC 5.4.99.2)	BM58_1170_1contig495	1359	1517	f	0.0920248	0.101537	0.00757494	0	0.000783618	0	0	0
prot_000000007975	Cytosol aminopeptidase PepA (EC 3.4.11.1)	BM58_1170_1contig347	1	735	r	0.0877105	0.124093	0.00294029	0	0.000779867	0	0	0
prot_000000009017	Proline dehydrogenase (EC 1.5.99.8) (Proline oxidase) / Delta-1-pyrroline-5-carboxylate dehydrogenase (EC 1.5.1.12)	BM58_1170_1contig730	162	1190	f	0.142654	0.103326	0.0110424	0.000234941	0.000779644	0	0	0
prot_000000009067	Aldehyde dehydrogenase (EC 1.2.1.3); Probable coniferyl aldehyde dehydrogenase (EC 1.2.1.68)	BM58_1170_1contig674	75	521	r	0.164072	0.227109	0.00451337	0.000268054	0.000771741	0	0	0
prot_000000004438	ATP-dependent protease La (EC 3.4.21.53) Type II	BM58_1170_1contig644	477	2561	r	0.0912587	0.0773184	0.00592009	0.000197017	0.000764614	0	0	0
prot_000000000997	Molybdenum cofactor biosynthesis protein MoaE	BM58_1170_1contig816	489	818	r	0.0816429	0.0858394	0.00216684	0.000367051	0.00076269	0	0	0
prot_000000004657	Aldehyde dehydrogenase (EC 1.2.1.3)	BM58_1170_1contig674	213	794	r	0.158321	0.216649	0.00422501	0	0.000758639	0	0	0
prot_000000016135	Excinuclease ABC subunit B	BM58_1170_1contig719	43	1143	r	0.129338	0.107222	0.00707494	0.00107147	0.000750373	0	0	0
prot_000000005678	Chemotaxis regulator - transmits chemoreceptor signals to flagelllar motor components CheY	BM58_1170_1contig1219	548	1093	f	0.131105	0.162276	0.00430028	0	0.000745142	0	0	0
prot_000000009573	FIG137360: hypothetical protein	BM58_1170_1contig297	205	978	r	0.174257	0.101067	0.00854338	9.68578e-05	0.000738385	0	0	0
prot_000000013892	Phosphate ABC transporter, periplasmic phosphate-binding protein PstS (TC 3.A.1.7.1)	BM58_1170_1contig195	876	1679	f	0.119959	0.156252	0.00402736	0	0.000735469	0	0	0
prot_000000012352	Phosphate transport system regulatory protein PhoU	BM58_1170_1contig1244	79	462	r	0.100766	0.144035	0.0060157	0	0.000730586	0	0	0
prot_000000011305	Polyhydroxyalkanoic acid synthase	BM58_1170_1contig324	15	959	r	0.200471	0.136087	0.00481514	0.000707417	0.000730104	0	0	0
prot_000000015049	Methylmalonyl-CoA epimerase (EC 5.1.99.1)	BM58_1170_1contig495	920	1297	f	0.136679	0.141464	0.00651516	0	0.000724698	0	0	0
prot_000000005214	Hydroxypyruvate isomerase (EC 5.3.1.22)	BM58_1170_1contig56	1815	2276	f	0.167563	0.142064	0.00735264	0.00118664	0.000716192	0	0	0
prot_000000004906	N-acetylglutamate synthase (EC 2.3.1.1)	BM58_1170_1contig109	500	1726	r	0.16471	0.184564	0.0038817	0.0010234	0.000714324	0	0	0
prot_000000014496	Ribosomal small subunit pseudouridine synthase A (EC 4.2.1.70)	BM58_1170_1contig62	706	1119	f	0.152559	0.176294	0.00696507	0.00087719	0.000712491	0	0	0
prot_000000007671	Alanyl-tRNA synthetase (EC 6.1.1.7)	BM58_1170_1contig348	44	190	f	0.0774479	0.0917512	0.00289658	0	0.000712341	0	0	0
prot_000000015422	Exodeoxyribonuclease V gamma chain (EC 3.1.11.5)	BM58_1170_1contig35	39	794	r	0.0773578	0.0978861	0.00440807	0	0.000710619	0	0	0
prot_000000014436	glutamyl-Q-tRNA synthetase	BM58_1170_1contig827	1492	1635	f	0.063443	0.0849126	0.00335018	0.000143561	0.000709969	0	0	0
prot_000000006035	putative Glutathione-regulated potassium-efflux system protein KefB	BM58_1170_1contig1054	46	570	r	0.0807991	0.104213	0.0030632	0	0.000709633	0	0	0
prot_000000009930	Glycerol-3-phosphate acyltransferase (EC 2.3.1.15)	BM58_1170_1contig557	1125	1178	r	0.181825	0.152572	0.00392364	0	0.000708607	0	0	0
prot_000000006995	Phosphoribosylglycinamide formyltransferase 2 (EC 2.1.2.-)	BM58_1170_1contig492	1	120	r	0.0663762	0.0944021	0.00591764	0	0.000707495	0	0	0
prot_000000012717	Anthranilate phosphoribosyltransferase (EC 2.4.2.18)	BM58_1170_1contig801	125	250	f	0.113816	0.142733	0.00254716	0	0.000699948	0	0	0
prot_000000009692	Sodium/alanine symporter	BM58_1170_1contig298	1	951	f	0.10101	0.140606	0.00537247	0	0.000691607	0	0	0
prot_000000012472	DNA polymerase I (EC 2.7.7.7)	BM58_1170_1contig966	12	875	r	0.1299	0.170329	0.00300506	4.05798e-05	0.000689118	0	0	0
prot_000000000239	Capsular polysaccharide ABC transporter, ATP-binding protein KpsT	BM58_1170_1contig5	10783	11307	r	0.169449	0.162364	0.00646055	0.000691373	0.000683642	0	0	0
prot_000000004730	Oligopeptide transport system permease protein OppB (TC 3.A.1.5.1)	BM58_1170_1contig52	765	1694	f	0.162157	0.173356	0.00708366	0.000102691	0.000681475	0	0	0
prot_000000015199	ATP-dependent RNA helicase RhlB	BM58_1170_1contig548	14	556	r	0.103991	0.100567	0.00713771	0	0.000669314	0	0	0
prot_000000004516	Propionyl-CoA carboxylase biotin-containing subunit (EC 6.4.1.3)	BM58_1170_1contig495	20	640	f	0.0871042	0.107978	0.00670336	0	0.000664988	0	0	0
prot_000000014360	ATP-dependent helicase DinG/Rad3	BM58_1170_1contig188	142	1470	r	0.111048	0.0913678	0.00780065	9.09336e-05	0.000662566	0	0	0
prot_000000010619	B12 binding domain / kinase domain / Methylmalonyl-CoA mutase (EC 5.4.99.2)	BM58_1170_1contig535	975	4310	f	0.123834	0.0983883	0.00818041	0.000282799	0.000658596	0	0	0
prot_000000003885	Epoxyqueuosine (oQ) reductase QueG	BM58_1170_1contig62	112	354	f	0.152684	0.184415	0.00829526	0	0.000641228	0	0	0
prot_000000007985	ATP-dependent 23S rRNA helicase DbpA	BM58_1170_1contig520	706	1485	r	0.131054	0.166314	0.00603287	0	0.000636806	0	0	0
prot_000000010282	Chromosome (plasmid) partitioning protein ParB	BM58_1170_1contig707	13	363	r	0.0596476	0.110089	0.00516202	0	0.000633208	0	0	0
prot_000000013410	[Protein-PII] uridylyltransferase (EC 2.7.7.59)	BM58_1170_1contig286	151	456	f	0.152335	0.111094	0.0102425	0.0011878	0.000615675	0	0	0
prot_000000006752	S-adenosylhomocysteine deaminase (EC 3.5.4.28); Methylthioadenosine deaminase	BM58_1170_1contig505	1	756	r	0.107392	0.0958801	0.00481883	0	0.000606212	0	0	0
prot_000000002246	Oligopeptidase A (EC 3.4.24.70)	BM58_1170_1contig385	98	1414	r	0.136866	0.187712	0.00823518	0	0.000595538	0	0	0
prot_000000010273	ATP-dependent 23S rRNA helicase DbpA	BM58_1170_1contig833	64	480	r	0.107997	0.148216	0.00626973	0	0.000595248	0	0	0
prot_000000002580	Type IV fimbriae expression regulatory protein PilR	BM58_1170_1contig250	265	924	r	0.0917911	0.0994704	0.0061307	0	0.000593695	0	0	0
prot_000000014887	nucleotide sugar epimerase/dehydratase WbpM	BM58_1170_1contig208	3824	3970	f	0.102284	0.0593809	0.0049917	0	0.000587964	0	0	0
prot_000000008839	Chemotaxis protein CheV (EC 2.7.3.-)	BM58_1170_1contig574	169	741	r	0.102833	0.0827662	0.012104	0.000394792	0.000585869	0	0	0
prot_000000011635	Transcription-repair coupling factor	BM58_1170_1contig976	59	811	f	0.122073	0.0914903	0.00705708	0	0.000570214	0	0	0
prot_000000011782	DNA ligase (EC 6.5.1.2)	BM58_1170_1contig233	44	1159	f	0.0911832	0.0786752	0.00776989	7.03981e-05	0.000569645	0	0	0
prot_000000015032	Putative deoxyribonuclease YcfH	BM58_1170_1contig38	40	162	r	0.0762618	0.0930093	0.00387646	0	0.000568316	0	0	0
prot_000000010767	Mobile element protein	BM58_1170_1contig5	12	281	r	0.12414	0.104079	0.00246654	0	0.000549251	0	0	0
prot_000000005369	Proline dehydrogenase (EC 1.5.99.8) (Proline oxidase) / Delta-1-pyrroline-5-carboxylate dehydrogenase (EC 1.5.1.12)	BM58_1170_1contig626	1375	1500	r	0.0651893	0.0593695	0.00453299	0	0.000544771	0	0	0
prot_000000009020	NAD-specific glutamate dehydrogenase (EC 1.4.1.2), large form	BM58_1170_1contig1212	7	1530	f	0.0988774	0.0782868	0.00528086	0.000156996	0.000541964	0	0	0
prot_000000006484	Two-component sensor CbrB: intrcellular carbon:nitrogen balance	BM58_1170_1contig1134	979	1137	f	0.110825	0.166832	0.00145837	0.000749016	0.000540696	0	0	0
prot_000000015514	diguanylate cyclase/phosphodiesterase (GGDEF & EAL domains) with PAS/PAC sensor(s)	BM58_1170_1contig702	1086	1712	f	0.112702	0.164683	0.0100322	0	0.000534012	0	0	0
prot_000000011435	DNA repair protein RadA	BM58_1170_1contig211	66	998	r	0.111049	0.164146	0.00352247	0	0.00053138	0	0	0
prot_000000012559	Glutamine amidotransferase, class-II	BM58_1170_1contig621	273	968	r	0.100605	0.083909	0.00653692	0.000604668	0.000530282	0	0	0
prot_000000005856	Glutathione-regulated potassium-efflux system protein KefB	BM58_1170_1contig660	135	1070	r	0.142643	0.106655	0.00697245	0.000278974	0.000529675	0	0	0
prot_000000013851	Soluble lytic murein transglycosylase precursor (EC 3.2.1.-)	BM58_1170_1contig616	99	521	f	0.099858	0.0802222	0.00311993	0	0.000529084	0	0	0
prot_000000003116	FIG007317: Chromosome segregation protein SMC-like	BM58_1170_1contig138	177	344	r	0.106553	0.121371	0.00427896	0	0.000528856	0	0	0
prot_000000001583	Ferrochelatase, protoheme ferro-lyase (EC 4.99.1.1)	BM58_1170_1contig710	154	1038	f	0.163569	0.12497	0.00527193	0.000546424	0.000504677	0	0	0
prot_000000002508	Isohexenylglutaconyl-CoA hydratase	BM58_1170_1contig339	2003	2101	r	0.109993	0.147922	0.00240533	0	0.000496931	0	0	0
prot_000000008498	Flagellar motor rotation protein MotA	BM58_1170_1contig437	225	809	f	0.136386	0.094625	0.0119086	0.000155085	0.000486908	0	0	0
prot_000000016191	MaoC family protein	BM58_1170_1contig327	1569	1646	f	0.17974	0.159882	0.00285485	0	0.000477023	0	0	0
prot_000000003499	Dipeptide-binding ABC transporter, periplasmic substrate-binding component (TC 3.A.1.5.2)	BM58_1170_1contig52	63	407	f	0.119406	0.125125	0.00410589	0.000702092	0.000476291	0	0	0
prot_000000004961	Sulfate permease	BM58_1170_1contig864	925	1710	f	0.0815182	0.0674128	0.0072265	0	0.000475268	0	0	0
prot_000000009352	Methylglutaconyl-CoA hydratase (EC 4.2.1.18)	BM58_1170_1contig380	781	1128	r	0.141346	0.0903721	0.0145747	8.70027e-05	0.000474552	0	0	0
prot_000000009905	Glycerol-3-phosphate acyltransferase (EC 2.3.1.15)	BM58_1170_1contig309	36	1262	r	0.114899	0.107724	0.00440767	9.8499e-05	0.000470605	0	0	0
prot_000000013003	DNA polymerase III delta prime subunit (EC 2.7.7.7)	BM58_1170_1contig63	1940	2179	r	0.132879	0.120428	0.00803929	0	0.000467963	0	0	0
prot_000000003110	BatA (Bacteroides aerotolerance operon)	BM58_1170_1contig716	1668	2381	r	0.0486822	0.0478975	0.00440759	0	0.000456696	0	0	0
prot_000000000749	Transcription-repair coupling factor	BM58_1170_1contig1042	71	1075	r	0.103505	0.0879246	0.00631085	0	0.000452167	0	0	0
prot_000000011898	Succinyl-CoA:3-ketoacid-coenzyme A transferase subunit B (EC 2.8.3.5)	BM58_1170_1contig95	46	555	f	0.0845104	0.0899062	0.00541279	0	0.000451625	0	0	0
prot_000000002514	Chloride channel protein EriC	BM58_1170_1contig504	116	196	r	0.0806233	0.113654	0.00387394	0.000784939	0.000438499	0	0	0
prot_000000002106	Imidazole glycerol phosphate synthase amidotransferase subunit (EC 2.4.2.-)	BM58_1170_1contig79	7990	8538	f	0.13137	0.0507461	0.00247955	0.00153814	0.000430027	0	0	0
prot_000000015123	Flagellar basal-body rod protein FlgC	BM58_1170_1contig493	34	201	f	0.154824	0.108341	0.00498852	0	0.000427533	0	0	0
prot_000000011311	FIG00516073: hypothetical protein	BM58_1170_1contig635	837	1424	r	0.0726855	0.112117	0.00300781	0	0.000421845	0	0	0
prot_000000011015	Methyl-accepting chemotaxis protein I (serine chemoreceptor protein)	BM58_1170_1contig678	522	1478	f	0.103219	0.0547738	0.00690156	0.000126318	0.000421771	0	0	0
prot_000000013215	Methyl-accepting chemotaxis protein I (serine chemoreceptor protein)	BM58_1170_1contig199	22	198	r	0.0722324	0.0409942	0.00105629	0.000624383	0.000400981	0	0	0
prot_000000003923	diguanylate cyclase/phosphodiesterase (GGDEF & EAL domains) with PAS/PAC sensor(s)	BM58_1170_1contig831	562	1287	r	0.146422	0.166424	0.00584072	0	0.000399043	0	0	0
prot_000000000813	DNA ligase (ATP) (EC 6.5.1.1)	BM58_1170_1contig196	368	592	f	0.15268	0.194535	0.00336803	0.000431285	0.000394281	0	0	0
prot_000000016729	LemA family protein	BM58_1170_1contig828	6	164	f	0.0921306	0.0561191	0.00279331	0	0.000391809	0	0	0
prot_000000015407	ABC-type multidrug transport system, permease component	BM58_1170_1contig33	21	458	r	0.120763	0.100182	0.00390199	0.000276338	0.00039004	0	0	0
prot_000000000380	Glucose-6-phosphate 1-dehydrogenase (EC 1.1.1.49)	BM58_1170_1contig543	174	1580	r	0.126522	0.129596	0.00708249	0	0.000378656	0	0	0
prot_000000002412	diguanylate cyclase/phosphodiesterase (GGDEF & EAL domains) with PAS/PAC sensor(s)	BM58_1170_1contig534	54	602	r	0.158894	0.170869	0.0104377	0	0.000376556	0	0	0
prot_000000014669	Phosphoenolpyruvate carboxylase (EC 4.1.1.31)	BM58_1170_1contig83	108	2351	f	0.116933	0.112843	0.00432929	0.000188973	0.000367994	0	0	0
prot_000000004600	3-isopropylmalate dehydratase small subunit (EC 4.2.1.33)	BM58_1170_1contig57	728	1255	f	0.131388	0.0993688	0.00501191	0	0.000367284	0	0	0
prot_000000009908	Aspartyl-tRNA(Asn) amidotransferase subunit A (EC 6.3.5.6) @ Glutamyl-tRNA(Gln) amidotransferase subunit A (EC 6.3.5.7)	BM58_1170_1contig362	1985	2083	f	0.113477	0.10313	0.00454892	0	0.000366381	0	0	0
prot_000000011067	Methylcrotonyl-CoA carboxylase carboxyl transferase subunit (EC 6.4.1.4)	BM58_1170_1contig920	1397	1591	r	0.0942872	0.0881442	0.00683582	0	0.000363776	0	0	0
prot_000000005086	Glycerol kinase (EC 2.7.1.30)	BM58_1170_1contig814	136	1386	f	0.0707141	0.0835728	0.00502614	0	0.000363181	0	0	0
prot_000000006145	Acetyl-CoA acetyltransferase	BM58_1170_1contig327	8	697	f	0.133021	0.0999634	0.00481371	0	0.000358197	0	0	0
prot_000000002280	Formamidopyrimidine-DNA glycosylase (EC 3.2.2.23)	BM58_1170_1contig481	369	1118	f	0.104007	0.164241	0.00631837	0	0.00034438	0	0	0
prot_000000000983	FIG074102: hypothetical protein	BM58_1170_1contig578	17	508	r	0.0632083	0.0800421	0.00145148	0	0.000336216	0	0	0
prot_000000009967	NAD-specific glutamate dehydrogenase (EC 1.4.1.2), large form	BM58_1170_1contig438	138	1124	f	0.117367	0.0922087	0.00590514	0.000242499	0.000334852	0	0	0
prot_000000007121	Putative deoxyribonuclease YcfH	BM58_1170_1contig1139	25	516	f	0.141574	0.127284	0.00762007	0	0.000332854	0	0	0
prot_000000010041	Outer membrane lipoprotein omp16 precursor	BM58_1170_1contig256	1147	1782	f	0.092968	0.0763783	0.00408972	0	0.000332764	0	0	0
prot_000000016569	Succinyl-CoA ligase [ADP-forming] beta chain (EC 6.2.1.5)	BM58_1170_1contig150	215	1342	r	0.147697	0.124275	0.00471699	0.00164263	0.000329578	0	0	0
prot_000000003982	YoeB toxin protein	BM58_1170_1contig415	401	589	f	0.163697	0.103579	0.00845215	0	0.000324896	0	0	0
prot_000000005672	Ferrichrome-iron receptor	BM58_1170_1contig201	240	1970	r	0.117037	0.11103	0.00250063	0.000731539	0.000323723	0	0	0
prot_000000009065	DNA recombination and repair protein RecF	BM58_1170_1contig242	2475	2753	r	0.137458	0.181313	0.00277328	0	0.000322148	0	0	0
prot_000000004330	FIG00923625: hypothetical protein	BM58_1170_1contig453	159	1202	r	0.172637	0.110928	0.00743008	0.000231562	0.000315761	0	0	0
prot_000000000587	Pyridoxamine 5'-phosphate oxidase (EC 1.4.3.5)	BM58_1170_1contig38	2633	3025	f	0.0503709	0.0579427	0.000923088	0	0.00031374	0	0	0
prot_000000016105	Chemotaxis regulator - transmits chemoreceptor signals to flagelllar motor components CheY	BM58_1170_1contig126	431	1057	r	0.175881	0.224502	0.00291219	0	0.000303925	0	0	0
prot_000000007281	Mobile element protein	BM58_1170_1contig496	264	1246	r	0.100343	0.0720754	0.0022368	0.000245947	0.000294189	0	0	0
prot_000000012856	Beta-lactamase related protein	BM58_1170_1contig423	515	1015	f	0.142022	0.13137	0.00702757	0	0.000288894	0	0	0
prot_000000002649	Cell wall-binding protein	BM58_1170_1contig1219	1352	1411	f	0.0307486	0.0397436	0.00045989	0	0.000286795	0	0	0
prot_000000013502	FIG039767: hypothetical protein	BM58_1170_1contig138	716	1054	r	0.151097	0.172213	0.0105313	0	0.000280835	0	0	0
prot_000000015917	S-adenosylhomocysteine deaminase (EC 3.5.4.28); Methylthioadenosine deaminase	BM58_1170_1contig527	28	324	f	0.0999476	0.0849957	0.00289826	0.000403893	0.000278855	0	0	0
prot_000000005991	Enoyl-CoA hydratase (EC 4.2.1.17)	BM58_1170_1contig38	3508	4257	r	0.125447	0.116064	0.0057812	0.00067877	0.000275504	0	0	0
prot_000000003965	Flagellar motor rotation protein MotA	BM58_1170_1contig422	1015	1782	f	0.112758	0.133255	0.00466688	0	0.000269577	0	0	0
prot_000000010367	putative cytochrome P450 hydroxylase	BM58_1170_1contig258	145	927	f	0.170953	0.126756	0.0053567	0.000154424	0.000263878	0	0	0
prot_000000004711	Na+/H+ antiporter NhaA type	BM58_1170_1contig211	1103	1219	r	0.0793168	0.0953599	0.00120975	0	0.000252604	0	0	0
prot_000000005429	Dipeptide-binding ABC transporter, periplasmic substrate-binding component (TC 3.A.1.5.2)	BM58_1170_1contig74	612	1088	f	0.110077	0.113215	0.00531376	0	0.000246236	0	0	0
prot_000000012224	Modification methylase DdeI	BM58_1170_1contig354	2563	3645	f	0.140165	0.109238	0.0024699	0.000171876	0.000245258	0	0	0
prot_000000001313	Adenylate cyclase (EC 4.6.1.1)	BM58_1170_1contig378	162	1415	f	0.104763	0.162326	0.00296214	0	0.000230562	0	0	0
prot_000000012252	Flagellar biosynthesis protein FlhA	BM58_1170_1contig224	1	906	f	0.119427	0.0729862	0.0047863	0.00036695	0.000228014	0	0	0
prot_000000013129	2-dehydropantoate 2-reductase (EC 1.1.1.169)	BM58_1170_1contig280	596	913	r	0.136534	0.161234	0.00705687	0	0.000220023	0	0	0
prot_000000001577	Nitrite reductase [NAD(P)H] large subunit (EC 1.7.1.4)	BM58_1170_1contig46	1589	2224	r	0.0814865	0.111118	0.0067126	0	0.000219676	0	0	0
prot_000000008418	Alginate biosynthesis protein Alg8	BM58_1170_1contig246	310	1173	r	0.158407	0.138216	0.00424378	0	0.000217113	0	0	0
prot_000000004392	possible Paralytic/GBP/PSP peptide	BM58_1170_1contig1219	1335	1496	f	0.0282308	0.0407209	0.000391044	0	0.000192254	0	0	0
prot_000000006913	Capsular polysaccharide ABC transporter, permease protein KpsM	BM58_1170_1contig5	11751	12092	r	0.130962	0.0953972	0.00783146	0	0.000190014	0	0	0
prot_000000011928	Flagellar regulatory protein FleQ	BM58_1170_1contig217	1232	2212	f	0.123917	0.0618282	0.00566161	0.000616121	0.000187823	0	0	0
prot_000000009383	FIG140336: TPR domain protein	BM58_1170_1contig284	862	1422	f	0.0953974	0.124915	0.00579804	0	0.000178348	0	0	0
prot_000000014047	Phosphoenolpyruvate carboxylase (EC 4.1.1.31)	BM58_1170_1contig557	132	371	r	0.124861	0.111886	0.00467244	0	0.00017268	0	0	0
prot_000000000452	Enoyl-CoA hydratase (EC 4.2.1.17)	BM58_1170_1contig200	1	123	r	0.0315883	0.0409074	0.00501976	0	0.000152227	0	0	0
prot_000000007500	MotA/TolQ/ExbB proton channel family protein	BM58_1170_1contig162	1	1104	r	0.125167	0.120531	0.00448656	0	0.000149667	0	0	0
prot_000000010242	Pyruvate dehydrogenase E1 component (EC 1.2.4.1)	BM58_1170_1contig143	11	2023	f	0.13906	0.127575	0.00624489	0.000360119	0.000143585	0	0	0
prot_000000005338	Aspartate carbamoyltransferase (EC 2.1.3.2)	BM58_1170_1contig391	224	1087	r	0.0962947	0.15573	0.00450194	0	0.000142988	0	0	0
prot_000000014013	Butyryl-CoA dehydrogenase (EC 1.3.99.2)	BM58_1170_1contig68	1509	2060	f	0.160473	0.192732	0.0105405	0.000135882	0.000137818	0	0	0
prot_000000012707	Chemotaxis protein methyltransferase CheR (EC 2.1.1.80)	BM58_1170_1contig123	64	786	r	0.158429	0.102025	0.00703264	0.000832941	0.0001309	0	0	0
prot_000000002142	Heme A synthase, cytochrome oxidase biogenesis protein Cox15-CtaA	BM58_1170_1contig253	34	714	f	0.148075	0.143971	0.00285456	0.00124134	0.000121384	0	0	0
prot_000000002129	Adenylate cyclase (EC 4.6.1.1)	BM58_1170_1contig551	144	1511	f	0.0886923	0.107179	0.00649215	0	0.000120762	0	0	0
prot_000000011618	Predicted signal transduction protein	BM58_1170_1contig213	861	1250	r	0.157204	0.177454	0.00723131	0	0.000115642	0	0	0
prot_000000005621	Microbial collagenase, secreted (EC 3.4.24.3)	BM58_1170_1contig633	3	1100	r	0.0787904	0.0892982	0.00819535	0	0.000112864	0	0	0
prot_000000004513	3-ketoacyl-CoA thiolase (EC 2.3.1.16) @ Acetyl-CoA acetyltransferase (EC 2.3.1.9)	BM58_1170_1contig2	123	530	r	0.0870029	0.107125	0.00641097	0	0.000109514	0	0	0
prot_000000007237	NADH dehydrogenase-like protein / Selenide,water dikinase (EC 2.7.9.3)	BM58_1170_1contig247	68	1348	r	0.078119	0.0685686	0.00559297	0	9.67278e-05	0	0	0
prot_000000005768	TonB system biopolymer transport component; Chromosome segregation ATPase	BM58_1170_1contig162	1287	1841	r	0.162886	0.147245	0.00317243	0	9.53543e-05	0	0	0
prot_000000010689	Methylglutaconyl-CoA hydratase (EC 4.2.1.18)	BM58_1170_1contig920	609	1313	r	0.0845856	0.0843085	0.00523116	0	9.02793e-05	0	0	0
prot_000000004372	Nitrate/nitrite transporter	BM58_1170_1contig157	133	1494	f	0.156174	0.116814	0.00641361	0.00105676	8.7029e-05	0	0	0
prot_000000002618	Dihydrolipoamide acyltransferase component of branched-chain alpha-keto acid dehydrogenase complex (EC 2.3.1.168)	BM58_1170_1contig58	56	571	f	0.0876077	0.0840691	0.00353204	0	8.0137e-05	0	0	0
prot_000000005437	Leucine dehydrogenase (EC 1.4.1.9)	BM58_1170_1contig905	33	473	f	0.134724	0.108091	0.00483363	0.00190746	7.97272e-05	0	0	0
prot_000000004131	Chemotaxis protein CheC -- inhibitor of MCP methylation	BM58_1170_1contig426	106	645	f	0.13568	0.110369	0.00231881	0.000410001	7.65687e-05	0	0	0
prot_000000008540	Queuosine Biosynthesis QueE Radical SAM	BM58_1170_1contig38	4376	4960	r	0.131268	0.134308	0.00569044	0	7.06687e-05	0	0	0
prot_000000014762	Acyl-CoA dehydrogenase, long-chain specific, mitochondrial precursor (EC 1.3.99.13)	BM58_1170_1contig799	531	1172	f	0.199229	0.166736	0.0111566	0.000376786	6.43846e-05	0	0	0
prot_000000015122	Acyl-CoA dehydrogenase, short-chain specific (EC 1.3.99.2)	BM58_1170_1contig68	1524	1991	f	0.163283	0.201249	0.0112504	0.000121536	4.06519e-05	0	0	0
prot_000000005773	4-hydroxyphenylpyruvate dioxygenase (EC 1.13.11.27)	BM58_1170_1contig586	1532	2584	f	0.124042	0.102129	0.00513085	0.000212363	3.92306e-05	0	0	0
prot_000000002547	Positive regulator of CheA protein activity (CheW)	BM58_1170_1contig199	1150	1299	r	0.095012	0.0489761	0.00549442	0	3.3238e-05	0	0	0
prot_000000008846	diguanylate cyclase/phosphodiesterase (GGDEF & EAL domains) with PAS/PAC sensor(s)	BM58_1170_1contig87	244	1512	f	0.210684	0.186147	0.00937913	0.000114284	3.25477e-05	0	0	0
prot_000000002492	Methylcrotonyl-CoA carboxylase biotin-containing subunit (EC 6.4.1.4)	BM58_1170_1contig920	140	403	r	0.0754567	0.0869502	0.0114252	0	6.27689e-06	0	0	0
prot_000000013774	Uncharacterized ABC transporter, periplasmic component YrbD	BM58_1170_1contig189	818	979	f	0.141738	0.162904	0.010994	0.0025277	0	0	0	0
prot_000000015047	Chemotaxis regulator - transmits chemoreceptor signals to flagelllar motor components CheY	BM58_1170_1contig25	432	752	r	0.142589	0.0728681	0.00256165	0.0015812	0	0	0	0
prot_000000011921	Putative subunit of Alternative cytochrome c oxidase	BM58_1170_1contig651	159	404	f	0.12184	0.067735	0.00354396	0.000985794	0	0	0	0
prot_000000002052	Flagellar hook protein FlgE	BM58_1170_1contig493	1233	1307	f	0.105232	0.0862824	0.0087313	0.000864901	0	0	0	0
prot_000000012889	Signal transduction histidine kinase CheA (EC 2.7.3.-)	BM58_1170_1contig25	16	306	r	0.105018	0.0494883	0.00797631	0.000803677	0	0	0	0
prot_000000014905	Signal transduction histidine kinase CheA (EC 2.7.3.-)	BM58_1170_1contig199	1530	2066	r	0.135601	0.0810627	0.00534499	0.000795302	0	0	0	0
prot_000000012185	Dihydrolipoamide acetyltransferase component of pyruvate dehydrogenase complex (EC 2.3.1.12)	BM58_1170_1contig143	2167	3390	f	0.114293	0.104314	0.00272732	0.000688222	0	0	0	0
prot_000000001338	NAD-dependent glyceraldehyde-3-phosphate dehydrogenase (EC 1.2.1.12)	BM58_1170_1contig156	622	1095	f	0.135786	0.158563	0.00419031	0.000508059	0	0	0	0
prot_000000003835	Uncharacterized ABC transporter, permease component YrbE	BM58_1170_1contig189	13	471	f	0.0934392	0.127804	0.00613493	0.000152927	0	0	0	0
prot_000000003162	Succinyl-CoA ligase [ADP-forming] alpha chain (EC 6.2.1.5)	BM58_1170_1contig150	3	173	r	0.0683363	0.0462333	0.00467604	0	0	0	0	0
prot_000000003174	transcriptional regulator, AraC family	BM58_1170_1contig440	811	1089	r	0.169264	0.106812	0.00344506	0	0	0	0	0
prot_000000003558	Flagellar basal-body rod modification protein FlgD	BM58_1170_1contig493	348	566	f	0.146223	0.0957422	0.0174466	0	0	0	0	0
prot_000000005132	FIG00857466: hypothetical protein	BM58_1170_1contig480	946	1392	r	0.154409	0.0966974	0.0108989	0	0	0	0	0
prot_000000005529	Enoyl-CoA hydratase [isoleucine degradation] (EC 4.2.1.17) / 3-hydroxyacyl-CoA dehydrogenase (EC 1.1.1.35) / 3-hydroxybutyryl-CoA epimerase (EC 5.1.2.3)	BM58_1170_1contig788	31	1023	f	0.102682	0.113556	0.00479435	0	0	0	0	0
prot_000000006157	Glutamine synthetase type I (EC 6.3.1.2)	BM58_1170_1contig331	1949	2035	r	0.0110921	0.0115877	0	0	0	0	0	0
prot_000000008169	Flagellar motor rotation protein MotB	BM58_1170_1contig207	199	543	f	0.153227	0.152727	0.00451814	0	0	0	0	0
prot_000000008635	Leucine dehydrogenase (EC 1.4.1.9)	BM58_1170_1contig480	2	442	r	0.0989862	0.0863083	0.00416734	0	0	0	0	0
prot_000000009578	Branched-chain alpha-keto acid dehydrogenase, E1 component, alpha subunit (EC 1.2.4.4)	BM58_1170_1contig905	743	1147	f	0.0656361	0.0661911	0.00689566	0	0	0	0	0
prot_000000010001	FIG016425: Soluble lytic murein transglycosylase and related regulatory proteins (some contain LysM/invasin domains)	BM58_1170_1contig127	9	122	f	0.0721787	0.0599299	0.00515319	0	0	0	0	0
prot_000000010205	Methyl-accepting chemotaxis protein I (serine chemoreceptor protein)	BM58_1170_1contig317	410	1129	r	0.140427	0.124713	0.00621377	0	0	0	0	0
prot_000000011210	Flagellar P-ring protein FlgI	BM58_1170_1contig175	112	171	f	0.106759	0.0587112	0.00449111	0	0	0	0	0
prot_000000014813	Flagellar motor rotation protein MotB	BM58_1170_1contig437	945	1013	f	0.203287	0.136063	0.0322023	0	0	0	0	0
prot_000000016223	Predicted hydrolase of the alpha/beta-hydrolase fold	BM58_1170_1contig1108	871	1044	f	0.0831597	0.0795109	0.00615356	0	0	0	0	0

## Sheet: Unknown bin functions
Functions and activity detected in the Unknown bin (myRAST annotation)
Unknown bin was determined using anvi'o and metagenomic data from Mason et al., 2012		Context
http://www.nature.com/ismej/journal/v6/n9/abs/ismej201259a.html
GENES METADATA						SIGNAL DETECTION OF EACH GENE IN THE 'OMIC DATA FROM MASON ET AL. 2012 AND 2014 (SUMMERIZED USING ANVI'O)
Protein Id	function	contig Id	start	stop	direction	MG_DISTAL	MG_PROXIMAL	MG_UNCONTAMINATED	MT_DISTAL	MT_PROXIMAL	SAG_COLWELLIA	SAG_OCEANOSPIRILLALES_HWTA	SAG_OCEANOSPIRILLALES_HWTC
prot_000000014482	Capsular polysaccharide synthesis enzyme CpsD, exopolysaccharide synthesis	BM58_1170_1contig526	2646	4337	r	0.00627798	0.00906362	0	0.000142112	0.00178872	0	0	0
prot_000000015071	UTP--glucose-1-phosphate uridylyltransferase (EC 2.7.7.9)	BM58_1170_1contig1259	22	753	r	0.00687088	0.0106361	0	0	0.00161017	0	0	0
prot_000000012377	Capsular polysaccharide ABC transporter, permease protein KpsM	BM58_1170_1contig1015	2477	3100	r	0.00700127	0.0106831	0	0	0.00121626	0	0	0
prot_000000010872	Capsular polysaccharide synthesis enzyme CpsC, polysaccharide export	BM58_1170_1contig526	4726	4860	r	0.00664075	0.0137844	0	0	0.0012104	0	0	0
prot_000000000945	Capsular polysaccharide export system protein KpsS	BM58_1170_1contig594	482	958	f	0.007481	0.0122411	0	0	0.00112714	0	0	0
prot_000000016426	Aspartate aminotransferase (EC 2.6.1.1)	BM58_1170_1contig455	570	1544	r	0.0274195	0.0187412	0.00118679	0.000245487	0.00102414	0	0	0
prot_000000001881	Mobile element protein	BM58_1170_1contig516	11	121	f	0.0793522	0.0735777	0.0016149	0.000768471	0.000982989	0	0	0
prot_000000004698	Asparagine synthetase [glutamine-hydrolyzing] (EC 6.3.5.4)	BM58_1170_1contig909	7453	9093	r	0.013051	0.00640387	0.00201885	0.000575082	0.000856867	0	0	0
prot_000000000745	Glutathione peroxidase family protein	BM58_1170_1contig2541	13	150	f	0.00340866	0.00507776	0	0	0.000825411	0	0	0
prot_000000002131	Aspartate aminotransferase (EC 2.6.1.1)	BM58_1170_1contig1603	3045	3098	r	0.00371538	0.00256683	0	0	0.000825411	0	0	0
prot_000000009986	UDP-glucose 4-epimerase (EC 5.1.3.2)	BM58_1170_1contig1466	1594	2525	f	0.0229133	0.0260542	0.000467222	0	0.000753154	0	0	0
prot_000000005308	RbmD, similar to Lipid A core - O-antigen ligase and related enzymes	BM58_1170_1contig526	277	645	f	0.0057403	0.0072049	0	0	0.000746907	0	0	0
prot_000000006810	UDP-Bac2Ac4Ac hydrolyzing 2-epimerase NeuC homolog	BM58_1170_1contig1750	7299	7394	r	0.00380892	0.0020102	0	0	0.000695083	0	0	0
prot_000000016759	UDP-N-acetyl-D-mannosaminuronate dehydrogenase	BM58_1170_1contig1012	150	695	f	0.0133068	0.012068	0	0	0.000683804	0	0	0
prot_000000015253	Type I secretion outer membrane protein, TolC precursor	BM58_1170_1contig770	545	1375	f	0.00693262	0.012051	0	0	0.000677732	0	0	0
prot_000000016796	Capsular polysaccharide ABC transporter, ATP-binding protein KpsT	BM58_1170_1contig1015	1851	2402	r	0.00662189	0.00911531	0	0	0.000646397	0	0	0
prot_000000004967	GDP-mannose 6-dehydrogenase (EC 1.1.1.132)	BM58_1170_1contig767	1858	2190	f	0.0117116	0.00790485	0	0	0.00059171	0	0	0
prot_000000009363	Glucose-1-phosphate thymidylyltransferase (EC 2.7.7.24)	BM58_1170_1contig787	1657	2490	f	0.00438538	0.00181372	0	0	0.000543998	0	0	0
prot_000000006357	UDP-N-acetylglucosamine 2-epimerase (EC 5.1.3.14)	BM58_1170_1contig1750	6474	7520	r	0.00429572	0.0039555	0	0	0.000512923	0	0	0
prot_000000011071	Lipid carrier : UDP-N-acetylgalactosaminyltransferase (EC 2.4.1.-)	BM58_1170_1contig3461	69	470	r	0.00438114	0.00106482	0	0	0.000500187	0	0	0
prot_000000009283	UDP-glucose 4-epimerase (EC 5.1.3.2)	BM58_1170_1contig767	10933	11349	f	0.0132522	0.00728491	0.000333767	0	0.00049604	0	0	0
prot_000000012790	UDP-glucose dehydrogenase (EC 1.1.1.22)	BM58_1170_1contig169	1918	3123	f	0.00394952	0.00132574	8.02183e-05	0	0.000480177	0	0	0
prot_000000005945	Glucose-1-phosphate thymidylyltransferase (EC 2.7.7.24)	BM58_1170_1contig169	4233	5057	f	0.00551309	0.00168481	0.00024671	0	0.00045077	0	0	0
prot_000000008011	UDP-N-acetylglucosamine 2-epimerase (EC 5.1.3.14)	BM58_1170_1contig1587	1643	2023	r	0.00682846	0.00147372	0	0	0.000415964	0	0	0
prot_000000011354	UDP-glucose 4-epimerase (EC 5.1.3.2)	BM58_1170_1contig30	358	1077	r	0.00806734	0.00259103	0	0	0.000401799	0	0	0
prot_000000015602	conserved hypothetical protein	BM58_1170_1contig2021	1975	2811	f	0.00447557	0.00230279	0	0	0.000394933	0	0	0
prot_000000004915	UDP-N-acetyl-D-mannosaminuronate dehydrogenase	BM58_1170_1contig1587	856	1494	r	0.0102675	0.00320858	7.57547e-05	0	0.000388124	0	0	0
prot_000000016026	Acetyltransferase (isoleucine patch superfamily)	BM58_1170_1contig1558	8740	8790	r	0.00541469	0.0018506	0	0.00111099	0.000379689	0	0	0
prot_000000001834	GDP-L-fucose synthetase (EC 1.1.1.271)	BM58_1170_1contig1246	1	558	r	0.00651627	0.00798735	0	0.000216804	0.00036899	0	0	0
prot_000000016207	Capsular polysaccharide export system periplasmic protein KpsD	BM58_1170_1contig1015	3	275	r	0.00473844	0.00694019	0	0	0.000318633	0	0	0
prot_000000016263	FIG00349935: hypothetical protein	BM58_1170_1contig1487	2002	2127	r	0.0142374	0.0110757	0.00133463	0.00085981	0.000313656	0	0	0
prot_000000001407	N-Acetylneuraminate cytidylyltransferase (EC 2.7.7.43)	BM58_1170_1contig1750	2920	3588	r	0.00457928	0.00232284	0	0	0.000308911	0	0	0
prot_000000007625	Imidazole glycerol phosphate synthase cyclase subunit (EC 4.1.3.-)	BM58_1170_1contig909	535	1122	r	0.0160863	0.00731661	0	0.00163756	0.000307947	0	0	0
prot_000000004441	UDP-glucose dehydrogenase (EC 1.1.1.22)	BM58_1170_1contig1587	328	1425	r	0.0099699	0.00283631	0.000515941	0	0.00030097	0	0	0
prot_000000013634	UDP-glucose dehydrogenase (EC 1.1.1.22)	BM58_1170_1contig183	5795	6943	r	0.00853508	0.00919488	0	0	0.0002876	0	0	0
prot_000000009865	DegT/DnrJ/EryC1/StrS family protein	BM58_1170_1contig1135	69	668	r	0.0249234	0.010783	0.000568348	0.00246358	0.000279041	0	0	0
prot_000000005381	FIG01062942: hypothetical protein	BM58_1170_1contig954	284	895	f	0.0220636	0.0115662	8.6735e-05	0	0.000270184	0	0	0
prot_000000009447	D-glycero-D-manno-heptose 1-phosphate guanosyltransferase	BM58_1170_1contig1750	3645	4313	r	0.00392481	0.00210149	0	0	0.000247129	0	0	0
prot_000000008326	Acriflavin resistance protein	BM58_1170_1contig809	1525	4233	f	0.00935079	0.0106031	4.60282e-05	0	0.000245977	0	0	0
prot_000000007269	GDP-mannose 4,6-dehydratase (EC 4.2.1.47)	BM58_1170_1contig1382	91	432	f	0.0168062	0.0121758	0.00120101	0	0.000242056	0	0	0
prot_000000004550	Putative glycosyltransferase	BM58_1170_1contig807	903	1331	r	0.00485056	0.00116458	0	0	0.000240102	0	0	0
prot_000000009906	FIG01199920: hypothetical protein	BM58_1170_1contig2527	202	657	f	0.00417108	0.00441347	0	0	0.000235832	0	0	0
prot_000000015064	FIG00634587: hypothetical protein	BM58_1170_1contig1036	143	1528	r	0.00952445	0.00768027	0.00019193	8.71912e-06	0.000226764	0	0	0
prot_000000001102	UDP-glucose 4-epimerase (EC 5.1.3.2)	BM58_1170_1contig1335	62	430	r	0.0216699	0.00981729	0.00141071	0	0.000224296	0	0	0
prot_000000013523	Aspartate aminotransferase (EC 2.6.1.1)	BM58_1170_1contig1851	1464	1649	r	0.00176948	0.00204094	0	0	0.000223084	0	0	0
prot_000000016429	UDP-N-acetylglucosamine 4,6-dehydratase (EC 4.2.1.-)	BM58_1170_1contig1294	373	675	r	0.012462	0.00613203	0.00132102	0	0.000218652	0	0	0
prot_000000003077	Type I restriction-modification system, restriction subunit R (EC 3.1.21.3)	BM58_1170_1contig1167	3176	5446	f	0.0212242	0.0134687	0.00132418	0	0.00021817	0	0	0
prot_000000004378	FIG01222021: hypothetical protein	BM58_1170_1contig1201	215	1075	r	0.0147835	0.00753814	5.61994e-05	0.00182544	0.000213071	0	0	0
prot_000000013896	Aspartate aminotransferase (EC 2.6.1.1)	BM58_1170_1contig1294	3620	3679	r	0.00688388	0.00171967	0.000847921	0	0.00020985	0	0	0
prot_000000004279	Arabinose 5-phosphate isomerase (EC 5.3.1.13)	BM58_1170_1contig529	428	1036	r	0.00645977	0.00339804	0	0	0.000203638	0	0	0
prot_000000003895	Hypothetical protein VpsJ	BM58_1170_1contig1025	443	1270	f	0.0130148	0.0121105	0	0	0.000199616	0	0	0
prot_000000004524	Cobalt-zinc-cadmium resistance protein CzcA; Cation efflux system protein CusA	BM58_1170_1contig1440	12	1925	r	0.0146691	0.00736623	0.00106101	0	0.000194164	0	40.1159	0
prot_000000002258	Capsular polysaccharide synthesis enzyme CpsD, exopolysaccharide synthesis	BM58_1170_1contig2183	4200	4613	r	0.00560081	0.00432543	0	0	0.000193862	0	0	0
prot_000000001486	Mobile element protein	BM58_1170_1contig1102	107	1513	f	0.00353321	0.00328748	0	0	0.000193437	0	0	0
prot_000000004294	Bacillosamine/Legionaminic acid biosynthesis aminotransferase PglE; 4-keto-6-deoxy-N-Acetyl-D-hexosaminyl-(Lipid carrier) aminotransferase	BM58_1170_1contig1638	22	1116	f	0.00983231	0.0029156	0.000154625	0.000331151	0.000188622	0	0	0
prot_000000002920	Legionaminic acid biosynthesis protein PtmG	BM58_1170_1contig909	1952	2896	r	0.0126935	0.00425678	8.30855e-06	0.00040168	0.000183182	0	0	0
prot_000000000416	Imidazole glycerol phosphate synthase amidotransferase subunit (EC 2.4.2.-)	BM58_1170_1contig909	1320	1775	r	0.0151248	0.00636105	0	0.000528158	0.000181409	0	0	0
prot_000000009221	Mannose-1-phosphate guanylyltransferase (GDP) (EC 2.7.7.22)	BM58_1170_1contig1259	1165	2547	r	0.00752235	0.00971984	1.74861e-05	0	0.000179177	0	0	0
prot_000000008493	DNA helicase related protein	BM58_1170_1contig1121	2991	4205	f	0.00964287	0.00527548	1.74613e-05	0	0.000169978	0	0	0
prot_000000013537	UDP-glucose 4-epimerase (EC 5.1.3.2)	BM58_1170_1contig3461	435	1071	r	0.00419865	0.00168905	0	0	0.000161578	0	0	0
prot_000000003540	Heparinase II/III-like	BM58_1170_1contig30	3131	3883	r	0.00927424	0.0039053	5.66596e-05	0.00113533	0.000154216	0	0	0
prot_000000012433	transferase, putative	BM58_1170_1contig787	2947	3381	f	0.00565688	0.00152383	0	0	0.000154051	0	0	0
prot_000000008362	4-amino-6-deoxy-N-Acetyl-D-hexosaminyl-(Lipid carrier) acetyltrasferase	BM58_1170_1contig1638	1136	1651	f	0.010761	0.00423306	0.000891552	0	0.000153062	0	0	0
prot_000000007021	dTDP-glucose 4,6-dehydratase (EC 4.2.1.46)	BM58_1170_1contig169	3153	4178	f	0.00450904	0.00128944	6.61792e-05	0	0.00015099	0	0	0
prot_000000004145	UDP-glucose 4-epimerase (EC 5.1.3.2)	BM58_1170_1contig1399	770	1045	r	0.00772773	0.00518358	0	0	0.000150075	0	0	0
prot_000000010209	Lipopolysaccharide biosynthesis protein RffA	BM58_1170_1contig1737	146	1180	r	0.0101929	0.00441021	0.000123006	0.000218395	0.000150075	0	0	0
prot_000000000474	N-acetylneuraminate synthase (EC 2.5.1.56)	BM58_1170_1contig1750	5384	6349	r	0.00300189	0.00244092	2.50422e-05	0	0.000145837	0	0	0
prot_000000013096	FIG01214411: hypothetical protein	BM58_1170_1contig787	3643	4221	f	0.00486547	0.00169183	0	0	0.000142805	0	0	0
prot_000000009697	Glucose-1-phosphate thymidylyltransferase (EC 2.7.7.24)	BM58_1170_1contig350	6183	7001	f	0.0050792	0.0015284	0	0	0.000134205	0	0	0
prot_000000007995	2-keto-3-deoxy-D-arabino-heptulosonate-7-phosphate synthase I alpha (EC 2.5.1.54)	BM58_1170_1contig1437	76	384	f	0.00352834	0.00203471	0.000208539	0	0.000133995	0	0	0
prot_000000007314	DNA-cytosine methyltransferase (EC 2.1.1.37)	BM58_1170_1contig1201	1536	2507	r	0.0156338	0.00966177	0.000134043	0	0.000133885	0	0	0
prot_000000013455	dTDP-glucose 4,6-dehydratase (EC 4.2.1.46)	BM58_1170_1contig787	632	1618	f	0.00476817	0.00165589	0	0	0.000130592	0	0	0
prot_000000001786	GDP-mannose 4,6-dehydratase (EC 4.2.1.47)	BM58_1170_1contig742	2737	3693	r	0.0122893	0.00396489	1.24173e-05	0.000251372	0.00012951	0	0	0
prot_000000014576	Lipopolysaccharide biosynthesis protein RffA	BM58_1170_1contig884	2603	3583	r	0.00416125	0.00470358	0	0	0.000126338	0	0	0
prot_000000001177	UDP-4-amino-4-deoxy-L-arabinose--oxoglutarate aminotransferase (EC 2.6.1.-)	BM58_1170_1contig787	5717	6403	f	0.00476523	0.00132759	0.000563633	0	0.000120322	0	0	0
prot_000000015044	FIG00847870: hypothetical protein	BM58_1170_1contig1741	97	1089	r	0.0111201	0.00431825	0.000487213	0	0.000120234	0	0	0
prot_000000004340	Type I restriction-modification system, specificity subunit S (EC 3.1.21.3)	BM58_1170_1contig1167	1845	2930	f	0.0208022	0.0126967	0.000347374	0	0.000114112	0	0	0
prot_000000010359	FIG138928: iron-regulated membrane protein	BM58_1170_1contig1267	374	877	r	0.00366481	0.00287615	0	0	0.000109945	0	0	0
prot_000000009765	Capsular polysaccharide export system periplasmic protein KpsD	BM58_1170_1contig1433	1033	2139	r	0.00731041	0.00818477	0	0	0.000106721	0	0	0
prot_000000006178	Legionaminic acid synthase (EC 2.5.1.56)	BM58_1170_1contig1750	5453	6184	r	0.00296503	0.00238968	0	0	0.000106705	0	0	0
prot_000000011646	Type I restriction-modification system, specificity subunit S (EC 3.1.21.3)	BM58_1170_1contig221	711	2263	f	0.00524636	0.00400054	0	0	0.000106367	0	0	0
prot_000000002472	N-acetylneuraminate synthase (EC 2.5.1.56)	BM58_1170_1contig1067	2636	4459	f	0.00364708	0.00161299	1.51165e-06	0.000198065	0.000101195	0	0	0
prot_000000014544	Mannose-1-phosphate guanylyltransferase (GDP) (EC 2.7.7.22)	BM58_1170_1contig5108	136	1428	r	0.00605203	0.00799357	0.000205746	0	9.58294e-05	0	0	0
prot_000000013646	Mannose-1-phosphate guanylyltransferase (GDP) (EC 2.7.7.22)	BM58_1170_1contig30	6563	7903	r	0.0101405	0.004109	0	0	9.23967e-05	0	0	0
prot_000000014767	Phage integrase	BM58_1170_1contig1162	94	549	f	0.00419472	0.00259811	0	0	9.07045e-05	0	0	0
prot_000000005457	FIG01057804: hypothetical protein	BM58_1170_1contig1556	665	1141	f	0.0146091	0.0118729	0.00155779	0	8.67028e-05	0	0	0
prot_000000010093	UDP-glucose 4-epimerase (EC 5.1.3.2)	BM58_1170_1contig448	369	1334	r	0.00647164	0.00210789	0	0	8.55348e-05	0	0	0
prot_000000002256	UDP-N-acetylglucosamine 2-epimerase (EC 5.1.3.14)	BM58_1170_1contig1805	6	1007	f	0.00449583	0.00380516	0.000241416	0	8.24586e-05	0	0	0
prot_000000015659	UDP-glucose dehydrogenase (EC 1.1.1.22)	BM58_1170_1contig448	1476	2633	r	0.00593539	0.0025121	0.000167093	0	7.95448e-05	0	0	0
prot_000000012211	Bacillosamine/Legionaminic acid biosynthesis aminotransferase PglE; 4-keto-6-deoxy-N-Acetyl-D-hexosaminyl-(Lipid carrier) aminotransferase	BM58_1170_1contig1293	4664	5713	r	0.00471912	0.00225909	0	0	7.86855e-05	0	0	0
prot_000000008114	Flagellar biosynthesis protein FlhB	BM58_1170_1contig289	8098	8634	f	0.00295432	0.0017808	0.00144273	0	7.69973e-05	0	0	0
prot_000000002313	WbjC	BM58_1170_1contig807	2692	3588	r	0.00368069	0.00144863	0	0	7.60004e-05	0	0	0
prot_000000003973	UDP-N-acetylglucosamine 2-epimerase (EC 5.1.3.14)	BM58_1170_1contig807	1364	2467	r	0.0043526	0.00207264	0	0	7.48333e-05	0	0	0
prot_000000003395	FIG01062552: hypothetical protein	BM58_1170_1contig2773	46	732	r	0.00418112	0.00319462	0.000105681	0.000176035	5.95595e-05	0	0	0
prot_000000009682	putatve zinc-binding dehydrogenase	BM58_1170_1contig30	4493	6265	r	0.00993421	0.00364539	8.82853e-05	0	5.86917e-05	0	0	0
prot_000000000942	Permease of the drug/metabolite transporter (DMT) superfamily	BM58_1170_1contig2527	802	1512	f	0.00214235	0.002925	0	0	5.81275e-05	0	0	0
prot_000000010092	FIG01220062: hypothetical protein	BM58_1170_1contig2773	48	797	f	0.00422171	0.0031226	9.67921e-05	0.000161228	5.45498e-05	0	0	0
prot_000000013609	dTDP-4-dehydrorhamnose reductase (EC 1.1.1.133)	BM58_1170_1contig350	5258	6040	f	0.00564759	0.00329815	0	0	5.27756e-05	0	0	0
prot_000000002954	type I secretion system ATPase	BM58_1170_1contig1207	103	2241	r	0.00425169	0.00785597	0.0017824	0	4.96096e-05	0	0	0
prot_000000008065	3-oxoacyl-[acyl-carrier-protein] synthase, KASIII (EC 2.3.1.180)	BM58_1170_1contig169	5533	6402	f	0.00373186	0.00109917	0	0	4.7492e-05	0	0	0
prot_000000016383	5'-nucleotidase (EC 3.1.3.5)	BM58_1170_1contig563	1523	2434	r	0.00783111	0.00554594	2.65266e-05	0	4.53025e-05	0	0	0
prot_000000003506	UDP-N-acetylglucosamine 4,6-dehydratase (EC 4.2.1.-)	BM58_1170_1contig1558	12428	13354	r	0.00681604	0.00301383	5.21939e-05	0	4.45686e-05	0	0	0
prot_000000005400	Phage tail sheath protein FI	BM58_1170_1contig164	7437	8378	r	0.0040878	0.00554716	0	0	4.38582e-05	0	0	0
prot_000000012614	Phosphodiesterase/alkaline phosphatase D	BM58_1170_1contig1300	487	1491	f	0.0145209	0.00989744	0	0	4.11061e-05	0	0	0
prot_000000000529	UDP-glucose dehydrogenase (EC 1.1.1.22)	BM58_1170_1contig350	2889	3944	f	0.00538274	0.00175533	0	0	3.9119e-05	0	0	0
prot_000000005181	dTDP-4-dehydrorhamnose reductase (EC 1.1.1.133)	BM58_1170_1contig1558	11605	12162	r	0.00469624	0.00161288	0.00147968	0	3.63062e-05	0	0	0
prot_000000001425	Probable poly(beta-D-mannuronate) O-acetylase (EC 2.3.1.-)	BM58_1170_1contig1257	1070	2239	f	0.00344575	0.0019995	0	0	3.3892e-05	0	0	0
prot_000000001743	Mannose-1-phosphate guanylyltransferase (GDP) (EC 2.7.7.22)	BM58_1170_1contig767	11893	13122	f	0.0116055	0.00717576	3.93259e-05	0.000393034	3.35806e-05	0	0	0
prot_000000001010	ATPase involved in DNA repair	BM58_1170_1contig1612	130	2769	r	0.00340352	0.00185223	0.000234713	0	3.12774e-05	0	0	0
prot_000000016048	Capsular polysaccharide biosynthesis protein CapD	BM58_1170_1contig1558	12596	12862	r	0.00712957	0.00201949	0	0	2.9479e-05	0	0	0
prot_000000004588	Glutamate-1-semialdehyde aminotransferase (EC 5.4.3.8)	BM58_1170_1contig955	3234	4640	r	0.00683184	0.00903995	0.000412502	0	2.93532e-05	0	0	0
prot_000000016499	FIG005666: putative helicase	BM58_1170_1contig2445	1472	2884	r	0.00551437	0.00329553	0	0	2.92284e-05	0	0	0
prot_000000000390	Type I restriction-modification system, DNA-methyltransferase subunit M (EC 2.1.1.72)	BM58_1170_1contig1167	316	1743	f	0.0220458	0.0122051	0.000282244	8.46249e-05	2.89212e-05	0	0	0
prot_000000001040	Exonuclease SbcC	BM58_1170_1contig1073	1325	2767	f	0.0123429	0.00777151	0	0	2.86203e-05	0	0	0
prot_000000013932	Type III restriction enzyme, res subunit:DEAD/DEAH box helicase, N-terminal	BM58_1170_1contig1910	226	3261	r	0.00298126	0.00261607	0	0	2.71964e-05	0	0	0
prot_000000015750	Phospholipid-lipopolysaccharide ABC transporter	BM58_1170_1contig787	7000	8250	f	0.00504542	0.00185753	0	0	2.70735e-05	0	0	0
prot_000000015578	Mobile element protein	BM58_1170_1contig2961	3	1622	f	0.00682715	0.0077659	0.000433519	0	2.54914e-05	0	0	0
prot_000000014571	Histidinol-phosphate aminotransferase (EC 2.6.1.9)	BM58_1170_1contig1591	73	747	f	0.00476923	0.00124503	0.000143417	0	2.44929e-05	0	0	0
prot_000000006620	FIG01220062: hypothetical protein	BM58_1170_1contig2048	21	1736	f	0.0119485	0.0126553	0.00134506	0	2.40645e-05	0	0	0
prot_000000016127	FIG01062552: hypothetical protein	BM58_1170_1contig2048	19	1734	r	0.011946	0.0126526	0.00134357	0	2.40645e-05	0	0	0
prot_000000016221	ATP-dependent DNA helicase RecQ	BM58_1170_1contig693	713	2551	f	0.00323814	0.00167355	0	0	2.2454e-05	0	0	0
prot_000000014061	RbmD, similar to Lipid A core - O-antigen ligase and related enzymes	BM58_1170_1contig2183	1969	2334	f	0.00502549	0.00413834	0	0	1.69605e-05	0	0	0
prot_000000003630	UDP-N-acetylglucosamine 4,6-dehydratase (EC 4.2.1.-)	BM58_1170_1contig1293	5818	6753	r	0.00548777	0.00268865	0	0	1.41247e-05	0	0	0
prot_000000016650	Methylamine utilization protein MauD	BM58_1170_1contig1199	1821	2096	f	0.0181934	0.00709815	0	0	6.00299e-06	0	0	0
prot_000000000052	GDP-mannose 4,6-dehydratase (EC 4.2.1.47)	BM58_1170_1contig1246	817	1776	r	0.00742605	0.00694929	0	0.000251845	0	0	0	0
prot_000000000249	FIG01062552: hypothetical protein	BM58_1170_1contig947	122	2366	r	0.00936758	0.0102624	0.000839986	0	0	0	0	0
prot_000000000287	CRISPR-associated protein, Csy2 family	BM58_1170_1contig1565	2850	3584	r	0.00476139	0.0033842	0.000484898	0	0	0	0	0
prot_000000000326	Capsular polysaccharide export system periplasmic protein KpsD	BM58_1170_1contig1562	5	106	f	0.00859095	0.0052289	0	0	0	0	0	0
prot_000000000333	Flagellar P-ring protein FlgI	BM58_1170_1contig1162	13176	13859	r	0.00443188	0.00296002	0	0	0	0	0	0
prot_000000000385	putative glycosyltransferase - possibly involved in cell wall localization and side chain formation of rhamnose-glucose polysaccharide	BM58_1170_1contig5185	1647	1898	f	0.00329816	0.00212653	0	0	0	0	0	0
prot_000000000590	Bacillosamine/Legionaminic acid biosynthesis aminotransferase PglE; 4-keto-6-deoxy-N-Acetyl-D-hexosaminyl-(Lipid carrier) aminotransferase	BM58_1170_1contig1750	7646	8140	r	0.00501048	0.00347919	0	0	0	0	0	0
prot_000000000625	Type I restriction-modification system, DNA-methyltransferase subunit M (EC 2.1.1.72)	BM58_1170_1contig1372	8014	9486	f	0.00282422	0.00270371	0	0	0	0	0	0
prot_000000000646	Modification methylase PstI (EC 2.1.1.72)	BM58_1170_1contig1646	3866	4027	r	0.00217628	0.00315053	0	0	0	0	0	0
prot_000000000667	ATPase-like protein	BM58_1170_1contig1704	536	2389	r	0.00567806	0.00297183	3.91243e-05	0	0	0	0	0
prot_000000000803	Lipid carrier : UDP-N-acetylgalactosaminyltransferase (EC 2.4.1.-)	BM58_1170_1contig1558	2094	2552	r	0.00607334	0.00153913	0	0	0	0	0	0
prot_000000000847	UDP-4-amino-4-deoxy-L-arabinose--oxoglutarate aminotransferase (EC 2.6.1.-)	BM58_1170_1contig791	2441	3061	r	0.00307716	0.0022083	0	0	0	0	0	0
prot_000000000855	DNA helicase IV	BM58_1170_1contig990	364	558	r	0.00353623	0.00214424	0	0	0	0	0	0
prot_000000000957	Cobalt-zinc-cadmium resistance protein CzcA; Cation efflux system protein CusA	BM58_1170_1contig457	24327	25019	f	0.000755903	0.000280333	0	0	0	0	0	0
prot_000000000990	Lipid carrier : UDP-N-acetylgalactosaminyltransferase (EC 2.4.1.-)	BM58_1170_1contig1067	15309	15671	f	0.00302636	0.00124854	0	0	0	0	0	0
prot_000000001072	DNA replication helicase DNA2	BM58_1170_1contig221	5114	5362	f	0.00497557	0.00212599	0	0	0	0	0	0
prot_000000001148	Putative outer membrane lipoprotein	BM58_1170_1contig1471	616	669	r	0.00483911	0.00485492	0.000311971	0	0	0	0	0
prot_000000001149	Mobile element protein	BM58_1170_1contig6073	259	864	r	0.00311085	0.00149657	0	0.000726555	0	0	0	0
prot_000000001153	Alkaline phosphatase (EC 3.1.3.1)	BM58_1170_1contig1202	513	887	f	0.0146337	0.0152647	6.80151e-06	0	0	0	0	0
prot_000000001205	Type I restriction-modification system, DNA-methyltransferase subunit M (EC 2.1.1.72)	BM58_1170_1contig1527	3921	5393	f	0.00556632	0.00222008	0.000204348	0	0	0	0	0
prot_000000001641	Sigma-54 dependent DNA-binding response regulator	BM58_1170_1contig769	2363	2797	r	0.0044847	0.003218	3.12598e-05	0	0	0	0	0
prot_000000001741	Gfa-like protein	BM58_1170_1contig796	1037	1189	f	0.00238837	0.00225034	0	0	0	0	0	0
prot_000000001758	FIG01220062: hypothetical protein	BM58_1170_1contig794	23	2572	r	0.00395622	0.00286476	4.74024e-05	0	0	0	0	0
prot_000000001859	Cobalt-zinc-cadmium resistance protein CzcD	BM58_1170_1contig281	1	384	f	0.0220643	0.00957849	0.000671363	0	0	0	0	0
prot_000000001916	FIG01220062: hypothetical protein	BM58_1170_1contig668	4512	6401	r	0.0143347	0.00839748	0.000255858	0	0	0	0	0
prot_000000002081	FIG00784939: hypothetical protein	BM58_1170_1contig1372	3018	3182	r	0.00224597	0.000779981	0	0	0	0	0	0
prot_000000002219	Type I restriction-modification system, restriction subunit R (EC 3.1.21.3)	BM58_1170_1contig749	5354	5848	r	0.00389674	0.00196061	0	0	0	0	0	0
prot_000000002268	nucleotidyltransferase substrate binding protein, HI0074 family	BM58_1170_1contig1382	648	827	f	0.0182832	0.0100358	3.67117e-05	0	0	0	0	0
prot_000000002370	N-acetylmannosaminyltransferase (EC 2.4.1.187)	BM58_1170_1contig1025	1590	2219	f	0.00736558	0.00605901	0	0.000190067	0	0	0	0
prot_000000002445	FMN-dependent NADH-azoreductase	BM58_1170_1contig1959	1255	1521	r	0.010772	0.00214722	7.17227e-05	0	0	0	0	0
prot_000000002634	Mobile element protein	BM58_1170_1contig1199	3688	3879	f	0.0502922	0.0269186	9.87762e-05	0	0	0	0	0
prot_000000002701	Type I restriction-modification system, specificity subunit S (EC 3.1.21.3)	BM58_1170_1contig1186	774	2339	f	0.00300631	0.00164699	0	0	0	0	0	0
prot_000000002731	dTDP-glucose 4,6-dehydratase (EC 4.2.1.46)	BM58_1170_1contig350	4191	5213	f	0.00524236	0.00164848	0	0	0	0	0	0
prot_000000002829	FIG01220062: hypothetical protein	BM58_1170_1contig2141	57	1521	r	0.00105643	0.00100731	0	0	0	0	0	0
prot_000000002878	PHP N-terminal domain protein	BM58_1170_1contig589	1212	1475	f	0.00360347	0.00172797	0	0	0	0	0	0
prot_000000002930	Ribonucleotide reductase of class III (anaerobic), activating protein (EC 1.97.1.4)	BM58_1170_1contig312	3870	4199	f	0.00432347	0.00242569	0	0	0	0	0	0
prot_000000002971	Asparagine synthetase [glutamine-hydrolyzing] (EC 6.3.5.4)	BM58_1170_1contig30	8351	8962	r	0.0100856	0.00360951	0.000288654	0	0	0	0	0
prot_000000002981	Glycosyl transferase, group 1 family protein	BM58_1170_1contig30	1463	2401	r	0.00759938	0.00263602	0	0	0	0	0	0
prot_000000003089	Flagellar biosynthesis protein FliQ	BM58_1170_1contig1162	20551	20601	r	0.00448413	0.00238107	0	0	0	0	0	0
prot_000000003095	dTDP-glucose 4,6-dehydratase (EC 4.2.1.46)	BM58_1170_1contig791	4038	5093	r	0.00258816	0.00161874	0	0.000227784	0	0	0	0
prot_000000003127	protein of unknown function DUF262	BM58_1170_1contig969	4786	5931	r	0.00398935	0.00229124	0	0	0	0	0	0
prot_000000003180	Lipopolysaccharide biosynthesis protein RffA	BM58_1170_1contig1558	379	1341	r	0.0060882	0.001981	0	0.00012553	0	0	0	0
prot_000000003222	Signal recognition particle receptor protein FtsY (=alpha subunit) (TC 3.A.5.1.1)	BM58_1170_1contig457	17001	17528	r	0.000749463	0.000309365	0	0	0	0	0	0
prot_000000003310	Periplasmic nitrate reductase precursor (EC 1.7.99.4)	BM58_1170_1contig1368	1	1161	f	0.00747834	0.00919933	0.000395818	0	0	0	0	0
prot_000000003603	Flagellar biosynthesis protein FliQ	BM58_1170_1contig289	6819	6920	f	0.00353808	0.00169333	0	0	0	0	0	0
prot_000000003638	CRISPR-associated protein, Csy4 family	BM58_1170_1contig1565	1463	1531	r	0.00322747	0.00216058	0.000480073	0	0	0	0	0
prot_000000003969	FIG024006: iron uptake protein	BM58_1170_1contig1267	952	1011	r	0.0026196	0.00207931	0	0	0	0	0	0
prot_000000004471	Flagellar biosynthesis protein FlhA	BM58_1170_1contig1162	16944	18446	r	0.00444601	0.00288338	1.77826e-05	0	0	0	0	0
prot_000000004472	type II site-specific deoxyribonuclease	BM58_1170_1contig2771	1648	1944	r	0.00292049	0.00039767	0	0	0	0	0	0
prot_000000004616	Type I restriction-modification system, DNA-methyltransferase subunit M (EC 2.1.1.72)	BM58_1170_1contig1186	1	735	f	0.00284188	0.00154733	0	0	0	0	0	0
prot_000000004644	Flagellar P-ring protein FlgI	BM58_1170_1contig289	14028	14978	f	0.00342549	0.00210343	0.000919548	0	0	0	0	0
prot_000000004782	Heavy metal RND efflux outer membrane protein, CzcC family	BM58_1170_1contig457	21848	22777	f	0.00107869	0.000193999	0	0	0	0	0	0
prot_000000004890	Transketolase, N-terminal section (EC 2.2.1.1)	BM58_1170_1contig1067	12494	13063	f	0.00321157	0.00140857	5.58823e-05	0.00106116	0	0	0	0
prot_000000004992	Mannose-1-phosphate guanylyltransferase (GDP) (EC 2.7.7.22)	BM58_1170_1contig1067	908	1108	f	0.00306981	0.00165654	0	0	0	0	0	0
prot_000000005507	Flagellar biosynthesis protein FlhA	BM58_1170_1contig289	8945	10414	f	0.00337207	0.00270141	9.87029e-05	0	0	0	0	0
prot_000000005569	putative outermembrane protein	BM58_1170_1contig1301	2077	2433	r	0.00602642	0.0079774	0	0	0	0	0	0
prot_000000005677	Putative 2-component regulator	BM58_1170_1contig4185	534	1166	r	0.0053323	0.00291031	0	0	0	0	0	0
prot_000000005783	Type I restriction-modification system, restriction subunit R (EC 3.1.21.3)	BM58_1170_1contig1527	173	1768	f	0.00539851	0.00263649	0.000431137	0	0	0	0	0
prot_000000005933	DNA helicase IV	BM58_1170_1contig1796	901	1446	r	0.00401738	0.00181509	4.16182e-05	0	0	0	0	0
prot_000000006007	Error-prone, lesion bypass DNA polymerase V (UmuC)	BM58_1170_1contig572	6	467	r	0.00856844	0.00810218	0.000314522	0	0	0	0	0
prot_000000006061	penicillin amidase family protein	BM58_1170_1contig1912	902	952	f	0.00619458	0.00868089	0	0	0	0	0	0
prot_000000006088	Cytochrome c-type protein NapC	BM58_1170_1contig285	15	221	r	0.00637871	0.0073113	0.000113193	0	0	0	0	0
prot_000000006147	Type I restriction-modification system, specificity subunit S (EC 3.1.21.3)	BM58_1170_1contig969	7793	8185	r	0.00386396	0.00161104	0	0	0	0	0	0
prot_000000006174	UDP-glucose 4-epimerase (EC 5.1.3.2)	BM58_1170_1contig1591	8586	8930	f	0.00585374	0.00250907	0.000165147	0	0	0	0	0
prot_000000006564	Anticodon nuclease	BM58_1170_1contig615	4062	5063	f	0.00266171	0.00255692	0	0	0	0	0	0
prot_000000006576	4-oxalocrotonate tautomerase (EC 5.3.2.-)	BM58_1170_1contig951	1000	1191	r	0.00841643	0.00837943	0	0	0	0	0	0
prot_000000006597	dTDP-glucose 4,6-dehydratase (EC 4.2.1.46)	BM58_1170_1contig448	25	312	r	0.000601093	0.000133594	0	0	0	0	0	0
prot_000000006632	DNA-cytosine methyltransferase (EC 2.1.1.37)	BM58_1170_1contig2184	2120	3082	r	0.00236663	0.0031272	3.2392e-05	0	0	0	0	0
prot_000000006745	UDP-glucose dehydrogenase (EC 1.1.1.22)	BM58_1170_1contig2006	84	449	f	0.00199311	0.00265538	5.98191e-05	0	0	0	0	0
prot_000000006844	type III restriction enzyme, res subunit	BM58_1170_1contig2209	1	402	f	0.00374002	0.00225641	0	0	0	0	0	0
prot_000000006848	Undecaprenyl-phosphate N-acetylglucosaminyl 1-phosphate transferase (EC 2.7.8.-)	BM58_1170_1contig1113	563	1135	f	0.00388871	0.000948524	0	0	0	0	0	0
prot_000000006905	putatve zinc-binding dehydrogenase	BM58_1170_1contig1591	4812	5135	f	0.00385325	0.00189095	0	0	0	0	0	0
prot_000000006906	FIG01060394: hypothetical protein	BM58_1170_1contig1497	758	1108	f	0.00444717	0.00456338	0	0	0	0	0	0
prot_000000006959	Flagellum-specific ATP synthase FliI	BM58_1170_1contig289	18457	19392	f	0.00285963	0.00213832	0.000258457	0	0	0	0	0
prot_000000007054	cyclolysin secretion ATP-binding protein	BM58_1170_1contig1207	1564	1785	r	0.00648775	0.0100403	0.00290442	0	0	0	0	0
prot_000000007133	putative inner membrane protein	BM58_1170_1contig2034	334	612	r	0.0061665	0.00517981	0	0	0	0	0	0
prot_000000007203	FIG01062942: hypothetical protein	BM58_1170_1contig2810	610	1446	f	0.00377902	0.0018399	0.000433596	0	0	0	0	0
prot_000000007419	DNA-cytosine methyltransferase (EC 2.1.1.37)	BM58_1170_1contig1132	919	1428	r	0.00506454	0.002049	0.00026737	0	0	0	0	0
prot_000000007453	UDP-N-acetylglucosamine 4,6-dehydratase (EC 4.2.1.-)	BM58_1170_1contig807	3669	4595	r	0.00424386	0.000960593	0	0	0	0	0	0
prot_000000007593	FIG00487045: hypothetical protein	BM58_1170_1contig1165	2085	2198	f	0.00687148	0.0054782	0	0.00145339	0	0	0	0
prot_000000007704	Phosphonate ABC transporter phosphate-binding periplasmic component (TC 3.A.1.9.1)	BM58_1170_1contig1556	130	267	f	0.0196679	0.0161719	0.00187842	0	0	0	0	0
prot_000000007739	UTP--glucose-1-phosphate uridylyltransferase (EC 2.7.7.9)	BM58_1170_1contig1067	22	831	f	0.00278973	0.000849185	1.17912e-05	0	0	0	0	0
prot_000000007832	Type I restriction-modification system, DNA-methyltransferase subunit M (EC 2.1.1.72)	BM58_1170_1contig969	8267	8341	r	0.00306183	0.00148724	0	0	0	0	0	0
prot_000000007871	N-acetylneuraminate synthase (EC 2.5.1.56)	BM58_1170_1contig860	615	1274	f	0.00908879	0.00321098	0	0	0	0	0	0
prot_000000007896	Integrase	BM58_1170_1contig969	12068	12733	r	0.00440571	0.00234947	0	0	0	0	0	0
prot_000000007996	ATP-dependent DNA helicase UvrD/PcrA	BM58_1170_1contig806	15916	16764	f	0.0128581	0.0093205	0.0016551	0	0	0	0	0
prot_000000008059	5'-nucleotidase (EC 3.1.3.5)	BM58_1170_1contig1522	242	454	f	0.00184808	0.00114658	0	0	0	0	0	0
prot_000000008128	Transketolase, C-terminal section (EC 2.2.1.1)	BM58_1170_1contig1067	13231	13851	f	0.00319691	0.00123054	2.53009e-05	0.000389548	0	0	0	0
prot_000000008136	Legionaminic acid cytidylyltransferase (EC 2.7.7.43)	BM58_1170_1contig909	3757	4392	r	0.0134324	0.00634109	3.80563e-05	0.000106497	0	0	0	0
prot_000000008206	N-Acetylneuraminate cytidylyltransferase (EC 2.7.7.43)	BM58_1170_1contig1067	1608	2087	f	0.0035592	0.0021849	0	0	0	0	0	0
prot_000000008249	FIG01202690: hypothetical protein	BM58_1170_1contig1027	2730	3581	f	0.00618707	0.00345106	0	0	0	0	0	0
prot_000000008333	Integrase	BM58_1170_1contig2009	1032	1442	r	0.00683394	0.00275438	0	0	0	0	0	0
prot_000000008369	Probable Co/Zn/Cd efflux system membrane fusion protein	BM58_1170_1contig457	23591	24295	f	0.00138818	0.000270213	0	0	0	0	0	0
prot_000000008406	possible DNA helicase	BM58_1170_1contig1733	457	1587	r	0.00472706	0.00204035	0	0	0	0	0	0
prot_000000008462	Integration host factor beta subunit	BM58_1170_1contig169	191	400	f	0.0042178	0.000937822	0	0	0	0	0	0
prot_000000008762	putative membrane protein	BM58_1170_1contig516	1209	1574	r	0.00285609	0.000741939	0	0	0	0	0	0
prot_000000008989	Thiamin biosynthesis lipoprotein ApbE	BM58_1170_1contig1158	1151	1504	f	0.00978261	0.00719929	7.20613e-06	0.000656824	0	0	0	0
prot_000000009015	Integrase	BM58_1170_1contig806	924	1505	f	0.0139526	0.00860176	0.00162214	0	0	0	0	0
prot_000000009056	Octanoate-[acyl-carrier-protein]-protein-N-octanoyltransferase	BM58_1170_1contig289	188	244	r	0.00316098	0.00349769	0	0	0	0	0	0
prot_000000009071	Alkaline phosphatase (EC 3.1.3.1)	BM58_1170_1contig1668	10	2046	r	0.00484937	0.00336779	0.000142431	0	0	0	0	0
prot_000000009238	Heparinase II/III-like	BM58_1170_1contig1113	2765	3121	r	0.00349993	0.00245543	0	0	0	0	0	0
prot_000000009354	Glycosyl transferase, group 1	BM58_1170_1contig1113	1584	2573	r	0.00311818	0.00117037	0	0	0	0	0	0
prot_000000009398	UDP-N-acetylglucosamine 4,6-dehydratase (EC 4.2.1.-)	BM58_1170_1contig5093	926	1087	r	0.00356151	0.0016933	0.00113232	0	0	0	0	0
prot_000000009502	UDP-glucose 4-epimerase (EC 5.1.3.2)	BM58_1170_1contig529	1458	1955	r	0.00505078	0.00409792	0	0	0	0	0	0
prot_000000009522	putative DNA helicase	BM58_1170_1contig4298	2752	3348	r	0.00449649	0.00217611	0	0	0	0	0	0
prot_000000009543	DNA-cytosine methyltransferase (EC 2.1.1.37)	BM58_1170_1contig1251	376	1287	f	0.00393568	0.00324625	0	0	0	0	0	0
prot_000000009709	Putative predicted metal-dependent hydrolase	BM58_1170_1contig749	4541	5119	r	0.00434609	0.00184552	0	0	0	0	0	0
prot_000000009777	FIG01062552: hypothetical protein	BM58_1170_1contig2141	47	1403	f	0.00101886	0.00102633	0	0	0	0	0	0
prot_000000009796	Flagellar biosynthesis protein FliP	BM58_1170_1contig289	23903	24475	f	0.0043047	0.00238986	0	0	0	0	0	0
prot_000000009822	ATP-dependent DNA helicase RecQ	BM58_1170_1contig693	5012	5149	f	0.00296563	0.00188995	0	0	0	0	0	0
prot_000000009980	UDP-N-acetylglucosamine 2-epimerase (EC 5.1.3.14)	BM58_1170_1contig1558	10386	11510	r	0.00653447	0.00263753	0	0	0	0	0	0
prot_000000010114	Phage terminase, ATPase subunit	BM58_1170_1contig670	19138	20616	f	0.00550676	0.00374011	3.27006e-05	0	0	0	0	0
prot_000000010147	unnamed protein product	BM58_1170_1contig278	5172	6668	r	0.00558743	0.00230179	0.000140848	0	0	0	0	0
prot_000000010245	GDP-mannose mannosyl hydrolase (EC 3.6.1.-)	BM58_1170_1contig1259	2613	2948	r	0.00723584	0.00967131	0	0	0	0	0	0
prot_000000010502	DEAD/DEAH box helicase-like protein	BM58_1170_1contig5025	6	1067	r	0.00223123	0.00210969	0	0	0	0	0	0
prot_000000010544	Type I restriction-modification system, restriction subunit R (EC 3.1.21.3)	BM58_1170_1contig820	146	3049	r	0.00273275	0.00186784	0.000174813	0	0	0	0	0
prot_000000010640	FIG00513011: hypothetical protein	BM58_1170_1contig312	732	1418	f	0.00418969	0.00147804	7.04541e-05	0	0	0	0	0
prot_000000010651	Bipolar DNA helicase HerA	BM58_1170_1contig486	1339	2832	f	0.00384267	0.00208496	0.000453209	0	0	0	0	0
prot_000000010716	Type I restriction-modification system, specificity subunit S (EC 3.1.21.3)	BM58_1170_1contig4202	153	563	f	0.00358974	0.000665911	0	0	0	0	0	0
prot_000000010787	Lipid carrier : UDP-N-acetylgalactosaminyltransferase (EC 2.4.1.-)	BM58_1170_1contig30	42	308	r	0.00935861	0.00285707	0	0	0	0	0	0
prot_000000010892	D-glycero-D-manno-heptose 1-phosphate guanosyltransferase	BM58_1170_1contig1224	286	1029	r	0.00845509	0.00209993	9.75737e-05	0.00231118	0	0	0	0
prot_000000010997	Type I restriction-modification system, specificity subunit S (EC 3.1.21.3)	BM58_1170_1contig1527	5687	6661	f	0.00578844	0.00223663	0.000446595	0	0	0	0	0
prot_000000011293	Flagellin protein FlaB	BM58_1170_1contig1378	2683	3399	r	0.00591354	0.0043407	0	0	0	0	0	0
prot_000000011351	Flagellar biosynthesis protein FliP	BM58_1170_1contig1162	7042	7581	r	0.00513744	0.00260532	0	0	0	0	0	0
prot_000000011415	Flagellin protein FlaB	BM58_1170_1contig1378	199	291	r	0.00324044	0.00145609	0	0	0	0	0	0
prot_000000011439	Rhs family protein	BM58_1170_1contig882	8034	8207	f	0.00279355	0.00409874	1.71545e-05	0	0	0	0	0
prot_000000011467	Integration host factor beta subunit	BM58_1170_1contig1293	318	527	r	0.00389294	0.00274696	0	0	0	0	0	0
prot_000000011566	site-specific DNA-methyltransferase	BM58_1170_1contig2771	130	1449	f	0.00163563	0.000521657	0	0	0	0	0	0
prot_000000011749	ATPase involved in DNA repair	BM58_1170_1contig589	297	1697	f	0.00460183	0.00221564	0.000105687	0.000147499	0	0	0	0
prot_000000011827	UDP-N-acetylglucosamine 4,6-dehydratase (EC 4.2.1.-)	BM58_1170_1contig1587	3	170	r	0.00831776	0.00211456	0	0	0	0	0	0
prot_000000011871	dTDP-4-dehydrorhamnose 3,5-epimerase (EC 5.1.3.13)	BM58_1170_1contig350	7046	7902	f	0.00568681	0.00141913	0	0	0	0	0	0
prot_000000011955	DNA recombination protein RmuC	BM58_1170_1contig1527	2795	3649	f	0.00553591	0.00302724	0	0	0	0	0	0
prot_000000011966	N-Acetylneuraminate cytidylyltransferase (EC 2.7.7.43)	BM58_1170_1contig1293	3580	4604	r	0.0042894	0.00242408	0.000283192	0.000353788	0	0	0	0
prot_000000012028	DNA helicase related protein	BM58_1170_1contig1372	16619	17446	f	0.00325582	0.00201468	5.89546e-05	0	0	0	0	0
prot_000000012054	Microbial collagenase, secreted (EC 3.4.24.3)	BM58_1170_1contig3400	1257	1484	f	0.00747992	0.00759482	0	0	0	0	0	0
prot_000000012129	N-Acetylneuraminate cytidylyltransferase (EC 2.7.7.43)	BM58_1170_1contig742	1991	2467	r	0.0110755	0.00378765	0.000455134	0.000507394	0	0	0	0
prot_000000012141	5'-nucleotidase (EC 3.1.3.5)	BM58_1170_1contig1527	6677	7588	f	0.00480289	0.00288825	0.000397899	0	0	0	0	0
prot_000000012181	putatve zinc-binding dehydrogenase	BM58_1170_1contig1591	3216	4070	f	0.00550994	0.00337163	0.000127585	0	0	0	0	0
prot_000000012197	Adenine-specific methyltransferase (EC 2.1.1.72)	BM58_1170_1contig5009	1575	1700	r	0.00213214	0.00409012	0	0	0	0	0	0
prot_000000012230	Periplasmic nitrate reductase precursor (EC 1.7.99.4)	BM58_1170_1contig1601	828	1052	f	0.00586338	0.00609638	0.000323649	0	0	0	0	0
prot_000000012243	FIG01062552: hypothetical protein	BM58_1170_1contig5133	13	1119	r	0.00257185	0.00285731	0.000393294	0	0	0	0	0
prot_000000012257	Type I restriction-modification system, DNA-methyltransferase subunit M (EC 2.1.1.72)	BM58_1170_1contig221	3	995	f	0.00583492	0.00398048	0	0	0	0	0	0
prot_000000012261	GDP-L-fucose synthetase (EC 1.1.1.271)	BM58_1170_1contig1259	3178	3555	r	0.00625314	0.00765861	0	0	0	0	0	0
prot_000000012322	COGs COG2378	BM58_1170_1contig806	14746	15552	f	0.0119956	0.00684676	0	0	0	0	0	0
prot_000000012435	GDP-L-fucose synthetase (EC 1.1.1.271)	BM58_1170_1contig1382	1374	1571	f	0.010495	0.00519971	0	0	0	0	0	0
prot_000000012543	putative membrane protein	BM58_1170_1contig925	913	1362	r	0.0264033	0.0150811	0.000484392	0	0	0	0	0
prot_000000012574	Methylamine dehydrogenase light chain precursor (EC 1.4.99.3)	BM58_1170_1contig1199	2417	2629	f	0.0106339	0.00611205	0	0	0	0	0	0
prot_000000012622	Type I restriction-modification system, restriction subunit R (EC 3.1.21.3)	BM58_1170_1contig2098	1851	4988	f	0.00163803	0.00108398	1.54069e-05	0	0	0	0	0
prot_000000012828	Arabinose 5-phosphate isomerase (EC 5.3.1.13)	BM58_1170_1contig1399	40	354	r	0.00795244	0.0080708	0	0.000384585	0	0	0	0
prot_000000013032	Retron-type RNA-directed DNA polymerase (EC 2.7.7.49)	BM58_1170_1contig1560	664	1419	f	0.00297307	0.00262375	0.000288069	0	0	0	0	0
prot_000000013124	Type I restriction-modification system, restriction subunit R (EC 3.1.21.3)	BM58_1170_1contig615	5176	8268	f	0.00258008	0.00238456	0	0	0	0	0	0
prot_000000013139	Nitrate reductase cytochrome c550-type subunit	BM58_1170_1contig285	430	594	r	0.0093869	0.0101013	0.000809144	0	0	0	0	0
prot_000000013160	Phage tail sheath protein FI	BM58_1170_1contig757	201	1158	r	0.00642256	0.00699069	0	0	0	0	0	0
prot_000000013380	putative terminase large subunit protein	BM58_1170_1contig547	1394	1828	f	0.0189612	0.00954507	0.000779541	0.000233729	0	0	0	0
prot_000000013397	UDP-N-acetylglucosamine 2-epimerase (EC 5.1.3.14)	BM58_1170_1contig169	768	1814	f	0.00394136	0.00149793	0.000249269	0	0	0	0	0
prot_000000013571	Transposase and inactivated derivatives	BM58_1170_1contig1162	21779	22219	r	0.0039815	0.00213637	0	0	0	0	0	0
prot_000000013649	Type III restriction-modification system restriction subunit (EC 3.1.21.5)	BM58_1170_1contig960	3518	4351	f	0.00565357	0.00323278	0	0	0	0	0	0
prot_000000013742	Phage terminase, large subunit	BM58_1170_1contig1375	545	1840	r	0.00916741	0.00354261	0.000139465	0	0	0	0	0
prot_000000013785	FIG01220062: hypothetical protein	BM58_1170_1contig947	1	2371	f	0.00914401	0.0100675	0.000795329	0	0	0	0	0
prot_000000013798	putative type II restriction enzyme methylase subunit	BM58_1170_1contig776	47	127	f	0.00423585	0.00173661	0	0	0	0	0	0
prot_000000014020	Molybdenum cofactor biosynthesis enzyme	BM58_1170_1contig749	1844	2404	r	0.00339095	0.00171983	3.02829e-06	0	0	0	0	0
prot_000000014084	pathogenesis related protein	BM58_1170_1contig4298	1010	2542	r	0.00459381	0.00304791	0	0	0	0	0	0
prot_000000014146	ATP synthase beta chain (EC 3.6.3.14)	BM58_1170_1contig159	8	124	r	0.0135669	0.0132316	0	0.000718313	0	0	0	0
prot_000000014189	Cobalt-zinc-cadmium resistance protein CzcD	BM58_1170_1contig457	20566	20934	f	0.000540631	9.85323e-05	0	0	0	0	0	0
prot_000000014199	Type I restriction-modification system, restriction subunit R (EC 3.1.21.3)	BM58_1170_1contig969	102	2176	r	0.00384489	0.00189355	0.000129703	0	0	0	0	0
prot_000000014228	type III restriction enzyme, res subunit	BM58_1170_1contig4202	1069	1239	f	0.00426707	0.00263615	0	0	0	0	0	0
prot_000000014278	Type I restriction-modification system, restriction subunit R (EC 3.1.21.3)	BM58_1170_1contig221	11288	13360	f	0.00549371	0.00394766	5.13582e-05	0	0	0	0	0
prot_000000014293	CRISPR-associated helicase Cas3, Yersinia-type	BM58_1170_1contig3523	686	2845	r	0.00453342	0.00370822	0.000503883	0	0	0	0	0
prot_000000014372	FIG01046921: hypothetical protein	BM58_1170_1contig1201	332	580	r	0.0153214	0.00841245	0.000194885	0	0	0	0	0
prot_000000014396	helicase, putative	BM58_1170_1contig781	2055	3311	f	0.00356873	0.00382669	0.000126581	0	0	0	0	0
prot_000000014439	putative adenylate cyclase	BM58_1170_1contig2227	1152	1334	f	0.00366108	0.00139941	0	0	0	0	0	0
prot_000000014580	UDP-glucose dehydrogenase (EC 1.1.1.22)	BM58_1170_1contig1164	1	351	f	0.0137812	0.00954211	0.00100297	0.000345028	0	0	0	0
prot_000000014718	transcriptional regulator	BM58_1170_1contig1372	977	1090	f	0.00256695	0.00164126	0.000380814	0	0	0	0	0
prot_000000014786	SIR2 family protein	BM58_1170_1contig848	4203	4727	f	0.0115407	0.00502764	0	0	0	0	0	0
prot_000000014830	blr5428; hypothetical protein	BM58_1170_1contig742	402	644	r	0.0127502	0.00425696	0	0	0	0	0	0
prot_000000014860	Methylamine utilization protein mauG	BM58_1170_1contig1657	1168	1347	r	0.00889146	0.00550051	0.000502121	0	0	0	0	0
prot_000000014941	DNA helicase related protein	BM58_1170_1contig1121	261	1367	f	0.0104212	0.00519079	0.000284046	0	0	0	0	0
prot_000000014943	Type I restriction-modification system, DNA-methyltransferase subunit M (EC 2.1.1.72)	BM58_1170_1contig615	1266	2771	f	0.00283945	0.00259321	0	0	0	0	0	0
prot_000000014968	4-amino-6-deoxy-N-Acetyl-D-hexosaminyl-(Lipid carrier) acetyltrasferase	BM58_1170_1contig1558	1621	1746	r	0.00410015	0.00189518	0	0	0	0	0	0
prot_000000015030	Type III restriction-modification system methylation subunit (EC 2.1.1.72)	BM58_1170_1contig960	771	2705	f	0.00874662	0.00703873	0.000349866	0	0	0	0	0
prot_000000015082	Type I restriction-modification system, specificity subunit S (EC 3.1.21.3)	BM58_1170_1contig615	2840	3982	f	0.00299881	0.00318177	0	0	0	0	0	0
prot_000000015193	Peptide chain release factor 3	BM58_1170_1contig953	2	136	r	0.00224034	0.00380589	0	0	0	0	0	0
prot_000000015198	FIG01062552: hypothetical protein	BM58_1170_1contig668	4571	6403	f	0.014404	0.00839954	0.000263818	0	0	0	0	0
prot_000000015209	Rubredoxin	BM58_1170_1contig6576	47	103	r	0.00174632	0.00250726	0	0	0	0	0	0
prot_000000015287	Type I restriction-modification system, specificity subunit S (EC 3.1.21.3)	BM58_1170_1contig1372	9905	11047	f	0.002809	0.00276036	0.000112116	0	0	0	0	0
prot_000000015292	Cytochrome c, class I	BM58_1170_1contig457	19203	19370	f	0.000830442	0.000141533	0	0	0	0	0	0
prot_000000015323	Putative ATP binding protein SugR	BM58_1170_1contig2298	538	1227	f	0.014134	0.00680543	0.00244131	0	0	0	0	0
prot_000000015367	CRISPR-associated protein, Csy3 family	BM58_1170_1contig1565	1559	2308	r	0.00485733	0.00483322	0.000688865	0	0	0	0	0
prot_000000015379	Type I restriction-modification system, restriction subunit R (EC 3.1.21.3)	BM58_1170_1contig769	110	1528	r	0.0053255	0.00226953	0.000250848	0	0	0	0	0
prot_000000015386	FIG01048028: hypothetical protein	BM58_1170_1contig1845	1166	2161	r	0.00255261	0.0017119	0	0.000121367	0	0	0	0
prot_000000015402	FIG01202690: hypothetical protein	BM58_1170_1contig668	934	1818	f	0.0138029	0.00757929	0.000322287	0	0	0	0	0
prot_000000015527	UDP-N-acetyl-D-mannosaminuronate dehydrogenase	BM58_1170_1contig1805	1076	1288	f	0.00196407	0.000938171	0	0	0	0	0	0
prot_000000015658	N-acetylneuraminate synthase (EC 2.5.1.56)	BM58_1170_1contig1224	1514	1837	r	0.00917942	0.00363534	0	0.000755216	0	0	0	0
prot_000000015661	Lipid carrier : UDP-N-acetylgalactosaminyltransferase (EC 2.4.1.-)	BM58_1170_1contig1591	9074	9445	f	0.0038814	0.00166712	0.000260547	0	0	0	0	0
prot_000000015693	putative inner membrane protein	BM58_1170_1contig1372	18249	18917	f	0.00283023	0.00284082	0	0	0	0	0	0
prot_000000015904	Adenylylsulfate kinase (EC 2.7.1.25)	BM58_1170_1contig141	5576	6019	f	0.00395924	0.00112302	2.29685e-05	0	0	0	0	0
prot_000000015933	FIG01062552: hypothetical protein	BM58_1170_1contig794	28	2574	f	0.00396239	0.00286787	4.74583e-05	0	0	0	0	0
prot_000000016040	Adenosine deaminase (EC 3.5.4.4)	BM58_1170_1contig848	2672	3616	f	0.0118703	0.00716314	0.00108483	0.000255847	0	0	0	0
prot_000000016058	Phage major capsid protein	BM58_1170_1contig1195	1998	2456	f	0.00736617	0.00504225	7.45171e-05	0	0	0	0	0
prot_000000016118	Glucose-1-phosphate thymidylyltransferase (EC 2.7.7.24)	BM58_1170_1contig791	3160	3969	r	0.00302388	0.00164276	0	0	0	0	0	0
prot_000000016186	Multimeric flavodoxin WrbA	BM58_1170_1contig221	19828	20268	f	0.0055189	0.00235018	0	0	0	0	0	0
prot_000000016236	FIG01220062: hypothetical protein	BM58_1170_1contig5133	15	1304	f	0.00234298	0.00268743	0.000337458	0	0	0	0	0
prot_000000016415	L-serine dehydratase (EC 4.3.1.17)	BM58_1170_1contig333	34	90	f	0.00041289	4.79628e-05	0	0	0	0	0	0
prot_000000016490	UDP-N-acetylglucosamine 2-epimerase (EC 5.1.3.14)	BM58_1170_1contig350	1732	2802	f	0.00602915	0.00225398	4.51696e-05	0	0	0	0	0
prot_000000016565	Rhs family protein-like precursor	BM58_1170_1contig2462	1006	1323	r	0.00139736	0.00191848	0	0	0	0	0	0
prot_000000016760	Periplasmic nitrate reductase precursor (EC 1.7.99.4)	BM58_1170_1contig285	909	1604	r	0.00972801	0.0106053	0.000104313	0	0	0	0	0
prot_000000016821	Nodulation protein nolO (EC 2.1.3.-)	BM58_1170_1contig1591	10848	12581	f	0.00502852	0.00180567	2.81336e-05	0	0	0	0	0
prot_000000016822	N-acetylneuraminate synthase (EC 2.5.1.56)	BM58_1170_1contig1293	887	1726	r	0.00566091	0.00217739	0	0	0	0	0	0

## Sheet: Cryptic bin functions
Functions and activity detected in the Cryptic bin (myRAST annotation)
Cryptic bin was determined using anvi'o and metagenomic data from Mason et al., 2012		Context
http://www.nature.com/ismej/journal/v6/n9/abs/ismej201259a.html
GENES METADATA						SIGNAL DETECTION OF EACH GENE IN THE 'OMIC DATA FROM MASON ET AL. 2012 AND 2014 (SUMMERIZED USING ANVI'O)
Protein Id	function	contig Id	start	stop	direction	MG_DISTAL	MG_PROXIMAL	MG_UNCONTAMINATED	MT_DISTAL	MT_PROXIMAL	SAG_COLWELLIA	SAG_OCEANOSPIRILLALES_HWTA	SAG_OCEANOSPIRILLALES_HWTC
prot_000000014558	putative cytochrome P450 hydroxylase	BM58_1170_1contig580	211	1242	r	0.0657454	0.0708647	0.00221233	0	0.0032384	0	0	0
prot_000000000185	Probable lipoprotein	BM58_1170_1contig176	515	940	f	0.0799743	0.0720172	0.00142551	0	0.00308704	0	0	0
prot_000000003361	Segregation and condensation protein B	BM58_1170_1contig530	445	705	f	0.095453	0.0918039	0.00324738	0	0.00217623	0	0	0
prot_000000003534	Glucose-6-phosphate isomerase (EC 5.3.1.9)	BM58_1170_1contig696	1547	1978	r	0.0827814	0.0782454	0.00570134	0.000616407	0.00213917	0	0	0
prot_000000009521	Capsular polysaccharide export system protein KpsS	BM58_1170_1contig112	907	1683	f	0.0941979	0.0928783	0.00241619	0.00030968	0.00206991	0	0	0
prot_000000000872	Tryptophan synthase alpha chain (EC 4.2.1.20)	BM58_1170_1contig931	901	1218	r	0.0658428	0.0676254	0.00725615	0	0.00196979	0	0	0
prot_000000003497	Acriflavin resistance protein	BM58_1170_1contig64	742	1344	r	0.0765591	0.0894065	0.00217403	0	0.00193121	0	0	0
prot_000000004672	Capsular polysaccharide ABC transporter, permease protein KpsM	BM58_1170_1contig559	122	415	f	0.0564555	0.0400967	0.00401677	0	0.00182548	0	0	0
prot_000000013875	RbmD, similar to Lipid A core - O-antigen ligase and related enzymes	BM58_1170_1contig482	932	1300	f	0.0647361	0.05509	0.00161865	0.00064974	0.00138839	0	0	0
prot_000000005660	Translation elongation factor G paralog	BM58_1170_1contig645	31	1113	r	0.0310034	0.0358609	0.000357349	0	0.00124918	0	0	0
prot_000000014064	Acetoacetyl-CoA synthetase (EC 6.2.1.16) / Long-chain-fatty-acid--CoA ligase (EC 6.2.1.3)	BM58_1170_1contig562	53	1147	f	0.0790737	0.0599086	0.00395845	0	0.00120416	0	0	0
prot_000000005504	Type I secretion outer membrane protein, TolC precursor	BM58_1170_1contig744	342	1121	f	0.0467998	0.0546593	0.00105419	0	0.00113746	0	0	0
prot_000000002874	Asparagine synthetase [glutamine-hydrolyzing] (EC 6.3.5.4)	BM58_1170_1contig86	10040	11401	r	0.0386889	0.0175523	0.000424116	0.00200616	0.00112289	0	0	0
prot_000000009659	FIG022979: MoxR-like ATPases	BM58_1170_1contig376	204	644	f	0.103041	0.0765183	0.00230625	0	0.00111712	0	0	0
prot_000000016507	Chromate transport protein ChrA	BM58_1170_1contig606	129	935	r	0.0740483	0.0951512	0.00398844	0	0.00110345	0	0	0
prot_000000004282	Nicotinate-nucleotide--dimethylbenzimidazole phosphoribosyltransferase (EC 2.4.2.21)	BM58_1170_1contig449	85	606	f	0.0445259	0.053396	0.00282451	0	0.000809568	0	0	0
prot_000000006308	Lipopolysaccharide biosynthesis protein RffA	BM58_1170_1contig86	2145	3227	r	0.0387956	0.0192277	0.00196072	0.00178238	0.000775062	0	0	0
prot_000000002848	SIR2 family protein	BM58_1170_1contig383	348	890	r	0.0659046	0.0562701	0.00189374	0.000521361	0.000718808	0	0	0
prot_000000013216	Capsular polysaccharide export system periplasmic protein KpsD	BM58_1170_1contig1057	223	1527	f	0.0613498	0.0440266	0.00424091	0.000185214	0.000653872	0	0	0
prot_000000000764	UDP-glucose dehydrogenase (EC 1.1.1.22)	BM58_1170_1contig394	7366	8526	r	0.0430254	0.0230239	0.00199956	0.000936929	0.000647165	0	0	0
prot_000000015634	UDP-glucose 4-epimerase (EC 5.1.3.2)	BM58_1170_1contig394	1502	2296	r	0.0337449	0.0169239	0.000253095	0	0.000622697	0	0	0
prot_000000009561	CRISPR-associated protein, Cse1 family	BM58_1170_1contig96	18	905	r	0.0551428	0.0608607	0.00114474	0	0.000601145	0	0	0
prot_000000014986	Glutamate synthase [NADPH] large chain (EC 1.4.1.13)	BM58_1170_1contig235	21	1001	f	0.075076	0.0968991	0.0025641	0	0.000600107	0	0	0
prot_000000009847	Phosphomannomutase (EC 5.4.2.8)	BM58_1170_1contig696	64	1347	r	0.078803	0.0657635	0.00412346	0	0.000592842	0	0	0
prot_000000015305	Capsular polysaccharide export system inner membrane protein KpsE	BM58_1170_1contig559	1856	2680	f	0.0656446	0.0483865	0.00485677	0.000291641	0.000500856	0	0	0
prot_000000009997	UDP-4-amino-4-deoxy-L-arabinose--oxoglutarate aminotransferase (EC 2.6.1.-)	BM58_1170_1contig394	516	1256	r	0.0381536	0.015827	0.000751098	0	0.000474611	0	0	0
prot_000000015571	putatve zinc-binding dehydrogenase	BM58_1170_1contig272	930	1739	r	0.0281673	0.0135899	0.00167016	0.000447811	0.000459128	0	0	0
prot_000000009552	UDP-glucose 4-epimerase (EC 5.1.3.2)	BM58_1170_1contig892	2808	3305	r	0.0129788	0.00996614	0.00113454	0	0.000415197	0	0	0
prot_000000001912	L-2-hydroxyglutarate oxidase (EC 1.1.3.15)	BM58_1170_1contig394	2756	3460	r	0.0311083	0.0132267	0.000430585	0.000372228	0.000387498	0	0	0
prot_000000015929	Capsular polysaccharide ABC transporter, ATP-binding protein KpsT	BM58_1170_1contig559	907	1431	f	0.0581711	0.0411808	0.00545243	0	0.000383564	0	0	0
prot_000000015327	2,3,4,5-tetrahydropyridine-2,6-dicarboxylate N-acetyltransferase (EC 2.3.1.89)	BM58_1170_1contig394	4854	5135	r	0.0465252	0.0191874	9.50517e-05	0.00415568	0.000368644	0	0	0
prot_000000015690	Type I restriction-modification system, DNA-methyltransferase subunit M (EC 2.1.1.72)	BM58_1170_1contig356	8865	11216	r	0.0449753	0.0406845	0.000516651	0	0.000359691	0	0	0
prot_000000008906	Microbial collagenase, secreted (EC 3.4.24.3)	BM58_1170_1contig264	503	793	f	0.0437115	0.0276835	0	0	0.000347242	0	0	0
prot_000000004313	CRISPR-associated protein, Cse4 family	BM58_1170_1contig569	27	524	f	0.0598298	0.0582371	0.000133501	0	0.000332157	0	0	0
prot_000000016601	Asparagine synthetase [glutamine-hydrolyzing] (EC 6.3.5.4)	BM58_1170_1contig86	19187	20857	r	0.0399779	0.0204981	0.000665644	0.000433144	0.000332141	0	0	0
prot_000000012287	tRNA 2-thiouridine synthesizing protein E (EC 2.8.1.-)	BM58_1170_1contig445	704	898	r	0.114921	0.0847373	0.00141721	0	0.000329739	0	0	0
prot_000000002174	FAD-dependent oxidoreductase	BM58_1170_1contig394	2450	3484	r	0.0332606	0.0150263	0.000307105	0.000295476	0.000308132	0	0	0
prot_000000004966	Glutamate--UDP-2-acetamido-2-deoxy-D-ribohex-3-uluronic acid aminotransferase (PLP cofactor)	BM58_1170_1contig394	3730	4626	r	0.0442211	0.0239394	0.000404561	0.000719707	0.000307687	0	0	0
prot_000000015081	Aldehyde dehydrogenase (EC 1.2.1.3)	BM58_1170_1contig19	351	1319	r	0.0798999	0.0682236	0.00406617	0.000123504	0.000297165	0	0	0
prot_000000010105	FIG00641648: hypothetical protein	BM58_1170_1contig356	11326	11445	r	0.0512502	0.0415889	0.000441774	0	0.000291321	0	0	0
prot_000000002217	Lipid carrier : UDP-N-acetylgalactosaminyltransferase (EC 2.4.1.-)	BM58_1170_1contig86	5805	6302	r	0.0401391	0.0167429	0	0.000242977	0.00027403	0	0	0
prot_000000006937	Type III restriction-modification system methylation subunit (EC 2.1.1.72)	BM58_1170_1contig458	1992	2888	f	0.056761	0.0425867	0.000544856	0.000133429	0.000254256	0	0	0
prot_000000006369	Anthranilate phosphoribosyltransferase like (EC 2.4.2.18)	BM58_1170_1contig445	51	674	r	0.0765759	0.0672158	0.00353698	0	0.000249743	0	0	0
prot_000000011283	RND multidrug efflux transporter; Acriflavin resistance protein	BM58_1170_1contig507	68	1192	r	0.0663666	0.0633705	0.00422452	0	0.000240867	0	0	0
prot_000000004750	CRISPR-associated protein Cas1	BM58_1170_1contig764	582	1448	r	0.0447649	0.0511831	0.0016273	0.000218929	0.000238283	0	0	0
prot_000000007392	CRISPR-associated helicase Cas3	BM58_1170_1contig96	1654	3771	r	0.0567759	0.0600144	0.000904796	0	0.000233938	0	0	0
prot_000000008044	Lipid carrier : UDP-N-acetylgalactosaminyltransferase (EC 2.4.1.-) / Alpha-1,3-N-acetylgalactosamine transferase PglA (EC 2.4.1.-); Putative glycosyltransferase	BM58_1170_1contig86	6520	7374	r	0.0415409	0.0224365	0.00290368	0.00075793	0.000224233	0	0	0
prot_000000013274	5'-nucleotidase (EC 3.1.3.5)	BM58_1170_1contig383	2611	3567	r	0.0683363	0.0569996	0.00486934	0	0.00021585	0	0	0
prot_000000005354	putative LPS biosynthesis protein WbpG	BM58_1170_1contig1652	272	931	r	0.0293621	0.0109327	0.00170678	0.000703669	0.000203535	0	0	0
prot_000000003230	Type I restriction-modification system, specificity subunit S (EC 3.1.21.3)	BM58_1170_1contig356	7441	8577	r	0.0474053	0.0451302	0.00323233	0	0.000181649	0	0	0
prot_000000015476	ADP-ribose 1"-phosphate phophatase related protein	BM58_1170_1contig356	4106	5047	r	0.0443571	0.0407517	0.00127887	0	0.000175433	0	0	0
prot_000000007567	Imidazole glycerol phosphate synthase amidotransferase subunit (EC 2.4.2.-)	BM58_1170_1contig1652	1955	2188	r	0.0268648	0.00907967	0	0	0.000170042	0	0	0
prot_000000012180	Phage integrase	BM58_1170_1contig897	201	1181	r	0.0543612	0.0581256	0.00416606	0.00122978	0.000168451	0	0	0
prot_000000015937	Putative DNA-binding protein in cluster with Type I restriction-modification system	BM58_1170_1contig429	1166	1939	f	0.0408666	0.0374245	0.000844082	1.24978e-05	0.00016017	0	0	0
prot_000000014414	Omega-amino acid--pyruvate aminotransferase (EC 2.6.1.18)	BM58_1170_1contig1629	16	1047	r	0.0607323	0.0895588	0.00473347	0	0.000159318	0	0	0
prot_000000003247	Alcohol dehydrogenase (EC 1.1.1.1)	BM58_1170_1contig761	972	1496	r	0.0558093	0.0312762	0.000565955	0	0.000157521	0	0	0
prot_000000006191	UDP-N-acetylglucosamine 2-epimerase (EC 5.1.3.14)	BM58_1170_1contig870	617	1699	r	0.0235234	0.0126583	0.000809522	0	0.000152571	0	0	0
prot_000000003221	Imidazole glycerol phosphate synthase cyclase subunit (EC 4.1.3.-)	BM58_1170_1contig1652	1210	1872	r	0.0288677	0.0105835	0.00498346	0.00200293	0.000124684	0	0	0
prot_000000008054	Type I restriction-modification system, restriction subunit R (EC 3.1.21.3)	BM58_1170_1contig356	1039	4035	r	0.0441529	0.0427598	0.00111226	0	0.000120809	0	0	0
prot_000000010329	CRISPR-associated helicase Cas3, Yersinia-type	BM58_1170_1contig1147	255	1634	f	0.0228032	0.0137975	0.00229381	0	0.000119712	0	0	0
prot_000000013832	UDP-glucose 4-epimerase (EC 5.1.3.2)	BM58_1170_1contig394	6259	7236	r	0.0434953	0.0213166	0.00074204	0.000741616	0.000108562	0	0	0
prot_000000003956	DNA-cytosine methyltransferase (EC 2.1.1.37)	BM58_1170_1contig202	2	778	r	0.0238792	0.0159164	0.000876877	0	0.000105304	0	0	0
prot_000000015719	UDP-glucose dehydrogenase (EC 1.1.1.22)	BM58_1170_1contig892	1	795	r	0.0148524	0.0108381	0.00073499	0	0.000103956	0	0	0
prot_000000002144	Na+/H+ antiporter NhaA type	BM58_1170_1contig1035	550	1371	f	0.0222671	0.00951857	0.00396411	0.000147089	0.000100537	0	0	0
prot_000000008391	glutamine synthetase family protein	BM58_1170_1contig19	1795	2736	r	0.0644878	0.0547197	0.00511659	0	8.77163e-05	0	0	0
prot_000000009279	Error-prone, lesion bypass DNA polymerase V (UmuC)	BM58_1170_1contig593	31	528	r	0.0413536	0.0396201	0.00120918	0	8.30393e-05	0	0	0
prot_000000011796	Alternative cytochrome c oxidase polypeptide CoxP (EC 1.9.3.1)	BM58_1170_1contig1280	797	1318	f	0.0838453	0.0625249	0.00207301	0	7.92141e-05	0	0	0
prot_000000013428	FIG00597186: hypothetical protein	BM58_1170_1contig590	325	918	f	0.0651495	0.0548989	0.00292197	0	6.95962e-05	0	0	0
prot_000000004811	Electron transfer flavoprotein-ubiquinone oxidoreductase (EC 1.5.5.1)	BM58_1170_1contig792	1	1485	r	0.0437684	0.0379127	0.00234178	0	5.56207e-05	0	0	0
prot_000000007877	UDP-2-acetamido-2-deoxy-D-glucuronic acid dehydrogenase (NAD+ cofactor)	BM58_1170_1contig394	5444	6217	r	0.0398805	0.0183903	0.00124172	0.000937333	5.33901e-05	0	0	0
prot_000000001371	Type I restriction-modification system, DNA-methyltransferase subunit M (EC 2.1.1.72)	BM58_1170_1contig177	15127	17625	r	0.0164654	0.00994873	0.00271247	0	3.30429e-05	0	0	0
prot_000000002663	Putative predicted metal-dependent hydrolase	BM58_1170_1contig356	288	872	r	0.0412236	0.0458366	0.00157352	0	3.10942e-05	0	0	0
prot_000000004512	Phage portal protein	BM58_1170_1contig102	4494	6098	r	0.0311675	0.0170352	0.00105977	0	2.57298e-05	0	0	0
prot_000000005006	CRISPR-associated protein, Cas5e family	BM58_1170_1contig569	633	983	f	0.0577941	0.0613387	0.00143359	0	1.76874e-05	0	0	0
prot_000000001879	Type I restriction-modification system, restriction subunit R (EC 3.1.21.3)	BM58_1170_1contig177	6777	9617	r	0.016899	0.0101265	0.00195798	0.000508127	1.58397e-05	0	0	0
prot_000000011990	Putative deoxyribonuclease YjjV	BM58_1170_1contig745	404	931	r	0.0617216	0.0779532	0.00108162	0	1.01806e-05	0	0	0
prot_000000016110	UTP--glucose-1-phosphate uridylyltransferase (EC 2.7.7.9)	BM58_1170_1contig394	8781	8831	r	0.0309625	0.0220796	0.000449398	0.00362279	0	0	0	0
prot_000000000604	putative formyl transferase	BM58_1170_1contig86	17631	17696	r	0.0523267	0.0251402	7.82697e-05	0.000984657	0	0	0	0
prot_000000013740	CRISPR-associated protein, Cas2	BM58_1170_1contig764	276	533	r	0.056844	0.0610435	0.00018806	0.000892777	0	0	0	0
prot_000000000807	FIG00643938: hypothetical protein	BM58_1170_1contig545	2213	2620	f	0.0151793	0.00713616	0	0.000593414	0	0	0	0
prot_000000003839	CRISPR-associated protein, Csy3 family	BM58_1170_1contig587	1645	2541	r	0.0185726	0.00976726	0.00222106	0.000539106	0	0	0	0
prot_000000001422	UTP--glucose-1-phosphate uridylyltransferase (EC 2.7.7.9)	BM58_1170_1contig187	542	1306	r	0.0603085	0.0400615	0.00257234	0.000312964	0	0	0	0
prot_000000008610	FIG00638839: hypothetical protein	BM58_1170_1contig177	11218	11442	r	0.0147094	0.00875202	0.00041639	0.000258771	0	0	0	0
prot_000000006219	ADP-ribose 1"-phosphate phophatase related protein	BM58_1170_1contig177	9917	10807	r	0.016428	0.0104483	0.000975348	0.000134328	0	0	0	0
prot_000000005102	Acetoacetyl-CoA synthetase (EC 6.2.1.16) / Long-chain-fatty-acid--CoA ligase (EC 6.2.1.3)	BM58_1170_1contig550	1760	1846	r	0.0363714	0.0159867	9.85955e-06	5.61673e-05	0	0	0	0
prot_000000000067	CRISPR-associated protein, Csy4 family	BM58_1170_1contig587	1164	1619	r	0.0235732	0.0118554	0.000974644	0	0	0	0	0
prot_000000001204	Primosomal protein I	BM58_1170_1contig89	635	1006	r	0.040488	0.0223284	0.000576518	0	0	0	0	0
prot_000000002633	Putative predicted metal-dependent hydrolase	BM58_1170_1contig177	6031	6135	r	0.018746	0.00955696	0.0045535	0	0	0	0	0
prot_000000002655	Carbon storage regulator	BM58_1170_1contig847	2	85	f	0.00706546	0.00383391	9.44973e-05	0	0	0	0	0
prot_000000004695	Phage terminase, large subunit	BM58_1170_1contig102	6428	7360	r	0.0443993	0.0247208	0.000683705	0	0	0	0	0
prot_000000005229	Phage major capsid protein	BM58_1170_1contig102	2031	3017	r	0.0393077	0.0228592	0.00250077	0	0	0	0	0
prot_000000007393	Alkyl hydroperoxide reductase subunit C-like protein	BM58_1170_1contig1355	52	543	f	0.0344676	0.0211263	0.00310372	0	0	0	0	0
prot_000000007424	Alternative cytochrome c oxidase polypeptide CoxN (EC 1.9.3.1)	BM58_1170_1contig140	384	2030	f	0.0701853	0.0655725	0.00411507	0	0	0	0	0
prot_000000008479	Glutamate-1-semialdehyde aminotransferase (EC 5.4.3.8)	BM58_1170_1contig187	3999	5453	f	0.0498339	0.0373589	0.00110204	0	0	0	0	0
prot_000000010941	UDP-glucose dehydrogenase (EC 1.1.1.22)	BM58_1170_1contig187	1469	2185	r	0.0607887	0.0380675	0.00158808	0	0	0	0	0
prot_000000011652	FIG00638839: hypothetical protein	BM58_1170_1contig356	5395	5706	r	0.0459255	0.0420143	0.000155407	0	0	0	0	0
prot_000000012485	Phosphatidylserine decarboxylase (EC 4.1.1.65)	BM58_1170_1contig187	8563	8613	f	0.0189495	0.0165547	0.00164073	0	0	0	0	0
prot_000000012857	Putative DNA-binding protein in cluster with Type I restriction-modification system	BM58_1170_1contig669	1457	1538	f	0.047306	0.0246325	0	0	0	0	0	0
prot_000000013441	DNA-cytosine methyltransferase (EC 2.1.1.37)	BM58_1170_1contig1131	968	1267	r	0.0239023	0.0181001	0.000486349	0	0	0	0	0
prot_000000013493	Type I restriction-modification system, specificity subunit S (EC 3.1.21.3)	BM58_1170_1contig429	10	909	f	0.029666	0.0276597	0.000188165	0	0	0	0	0
prot_000000014093	Putative heat shock protein YegD	BM58_1170_1contig606	1009	1137	r	0.0376615	0.0500798	0.001724	0	0	0	0	0
prot_000000015802	RelB/StbD replicon stabilization protein (antitoxin to RelE/StbE)	BM58_1170_1contig29	4767	4910	r	0.0213665	0.0184474	0.00235254	0	0	0	0	0
prot_000000016763	Heparinase II/III-like	BM58_1170_1contig272	66	116	r	0.018778	0.00511802	0.000271335	0	0	0	0	0

## Sheet: Matrix categories in each bin
Matrix of categories detected in each bin (RAST annotation)
Bins were determined using anvi'o and metagenomic data from Mason et al., 2012			Context
http://www.nature.com/ismej/journal/v6/n9/abs/ismej201259a.html
Categories	MG Oceanospirillales desum	SAGs Oceanospirillales	MG Cryptic	MG unknown
Amino Acids and Derivatives	17	67	5	3
Carbohydrates	10	22	0	1
Cell Division and Cell Cycle	9	10	0	0
Cell Wall and Capsule	16	19	0	36
Cofactors, Vitamins, Prosthetic Groups, Pigments	12	65	0	1
DNA Metabolism	10	30	20	9
Dormancy and Sporulation	0	2	0	0
Fatty Acids, Lipids, and Isoprenoids	4	6	0	0
Iron acquisition and metabolism	2	7	0	0
Membrane Transport	16	32	1	1
Metabolism of Aromatic Compounds	0	4	0	0
Miscellaneous	2	3	0	0
Motility and Chemotaxis	0	30	0	8
Nitrogen Metabolism	7	6	1	0
Nucleosides and Nucleotides	1	17	0	0
Phages, Prophages, Transposable elements, Plasmids	1	2	4	12
Phosphorus Metabolism	0	1	1	0
Potassium metabolism	4	9	0	0
Protein Metabolism	28	40	5	8
Regulation and Cell signaling	7	12	2	2
Respiration	16	33	0	0
RNA Metabolism	12	34	0	1
Stress Response	15	33	1	1
Sulfur Metabolism	0	2	0	1
Virulence, Disease and Defense	8	28	0	6

## Sheet: Matrix subsystems in each bin
Matrix of subsystems detected in each bin (RAST annotation)
Bins were determined using anvi'o and metagenomic data from Mason et al., 2012			Context
http://www.nature.com/ismej/journal/v6/n9/abs/ismej201259a.html
Subsystems	MG Oceanospirillales desum	SAGs Oceanospirillales	MG Cryptic	MG unknown
RNA processing and modification	6	24	0	0
Aromatic amino acids and derivatives	6	22	0	1
Resistance to antibiotics and toxic compounds	5	22	0	6
Arginine; urea cycle, polyamines	0	20	0	0
Oxidative stress	9	18	1	0
Riboflavin, FMN, FAD	0	18	0	0
Folate and pterines	0	17	0	0
DNA repair	5	16	0	1
Flagellar motility in Prokaryota	0	15	0	8
Motility and Chemotaxis - no subcategory	0	15	0	0
Electron donating reactions	2	14	0	0
Protein folding	2	14	0	0
Biotin	4	13	0	0
Central carbohydrate metabolism	0	12	0	0
Protein processing and modification	8	12	4	7
Protein biosynthesis	10	11	0	0
Cell Division and Cell Cycle - no subcategory	9	10	0	0
Protein secretion system, Type VI	0	10	0	0
Transcription	6	10	0	0
Membrane Transport - no subcategory	9	9	0	0
Potassium metabolism - no subcategory	4	9	0	0
Respiration - no subcategory	7	9	0	0
Cofactors, Vitamins, Prosthetic Groups, Pigments - no subcategory	0	8	0	0
Electron accepting reactions	6	8	0	0
Lysine, threonine, methionine, and cysteine	4	8	0	0
Regulation and Cell signaling - no subcategory	5	8	0	0
Alanine, serine, and glycine	3	7	2	0
Capsular and extracellular polysacchrides	9	7	0	35
Cell Wall and Capsule - no subcategory	7	7	0	0
Iron acquisition and metabolism - no subcategory	2	7	0	0
Purines	0	7	0	0
Pyrimidines	0	7	0	0
Uni- Sym- and Antiporters	2	7	1	0
DNA Metabolism - no subcategory	5	6	9	8
Fermentation	8	6	0	0
Invasion and intracellular resistance	3	6	0	0
Nitrogen Metabolism - no subcategory	7	6	1	0
Stress Response - no subcategory	2	6	0	1
Detoxification	0	5	0	0
DNA replication	0	5	0	0
Gram-Negative cell wall components	0	5	0	1
Branched-chain amino acids	0	4	0	0
Coenzyme A	0	4	0	0
Fatty Acids, Lipids, and Isoprenoids - no subcategory	0	4	0	0
Monosaccharides	1	4	0	0
Osmotic stress	1	4	0	0
Programmed Cell Death and Toxin-antitoxin Systems	2	4	2	2
Proline and 4-hydroxyproline	4	4	0	0
DNA recombination	0	3	0	0
NAD and NADP	2	3	0	0
Protein degradation	7	3	1	1
Protein translocation across cytoplasmic membrane	1	3	0	1
ABC transporters	2	2	0	0
Cold shock	2	2	0	0
Dormancy and Sporulation - no subcategory	0	2	0	0
Fatty acids	4	2	0	0
Glutamine, glutamate, aspartate, asparagine; ammonia assimilation	0	2	3	2
Metabolism of Aromatic Compounds - no subcategory	0	2	0	0
Miscellaneous - no subcategory	2	2	0	0
Quinone cofactors	6	2	0	0
Sodium Ion-Coupled Energetics	1	2	0	0
Sulfur Metabolism - no subcategory	0	2	0	1
Cation transporters	0	1	0	0
Metabolism of central aromatic intermediates	0	1	0	0
Nucleosides and Nucleotides - no subcategory	1	1	0	0
Peripheral pathways for catabolism of aromatic compounds	0	1	0	0
Phages, Prophages	1	1	4	11
Phages, Prophages, Transposable elements, Plasmids - no subcategory	0	1	0	1
Phosphorus Metabolism - no subcategory	0	1	1	0
Plant-Prokaryote DOE project	0	1	0	0
Carbohydrates - no subcategory	1	0	0	1
CRISPs	0	0	11	0
Lipoic acid	0	0	0	1
Periplasmic Stress	1	0	0	0
RNA Metabolism - no subcategory	0	0	0	1
Selenoproteins	1	0	0	0
TRAP transporters	2	0	0	0

## Sheet: Matrix functions in each bin
Matrix of functions detected in each bin (RAST annotation)
Bins were determined using anvi'o and metagenomic data from Mason et al., 2012			Context
http://www.nature.com/ismej/journal/v6/n9/abs/ismej201259a.html
Subsystems	MG Oceanospirillales desum	SAGs Oceanospirillales	MG Cryptic	MG unknown
hypothetical protein	270	537	195	956
Mobile element protein	6	6	3	16
Phage protein	0	0	6	16
Type I restriction-modification system, restriction subunit R (EC 3.1.21.3)	1	0	2	10
UDP-glucose dehydrogenase (EC 1.1.1.22)	0	1	2	9
UDP-glucose 4-epimerase (EC 5.1.3.2)	2	1	3	8
UDP-N-acetylglucosamine 2-epimerase (EC 5.1.3.14)	1	0	1	8
Type I restriction-modification system, specificity subunit S (EC 3.1.21.3)	0	0	3	8
Integrase	0	3	1	7
Mannose-1-phosphate guanylyltransferase (GDP) (EC 2.7.7.22)	0	1	0	7
Glycosyltransferase	1	2	1	6
Type I restriction-modification system, DNA-methyltransferase subunit M (EC 2.1.1.72)	0	0	2	6
FIG01062552: hypothetical protein	0	0	0	6
Glycosyltransferase (EC 2.4.1.-)	1	2	0	5
N-acetylneuraminate synthase (EC 2.5.1.56)	1	1	0	5
DNA-cytosine methyltransferase (EC 2.1.1.37)	0	0	3	5
Glycosyl transferase, group 1	0	0	1	5
putative membrane protein	1	2	1	4
dTDP-glucose 4,6-dehydratase (EC 4.2.1.46)	0	1	0	4
FIG01220062: hypothetical protein	0	0	0	4
Glucose-1-phosphate thymidylyltransferase (EC 2.7.7.24)	0	0	0	4
N-Acetylneuraminate cytidylyltransferase (EC 2.7.7.43)	0	1	0	4
UDP-N-acetylglucosamine 4,6-dehydratase (EC 4.2.1.-)	2	1	0	3
4-keto-6-deoxy-N-Acetyl-D-hexosaminyl-(Lipid carrier) aminotransferase	1	0	1	3
Lipid carrier : UDP-N-acetylgalactosaminyltransferase (EC 2.4.1.-)	1	0	1	3
Nucleoside-diphosphate sugar epimerase/dehydratase	1	0	1	3
4-amino-6-deoxy-N-Acetyl-D-hexosaminyl-(Lipid carrier) acetyltrasferase	1	0	0	3
5'-nucleotidase (EC 3.1.3.5)	0	0	1	3
CRISPR-associated protein, Csy4 family	0	1	1	3
UDP-4-amino-4-deoxy-L-arabinose--oxoglutarate aminotransferase (EC 2.6.1.-)	0	1	1	3
Aspartate aminotransferase (EC 2.6.1.1)	0	0	0	3
ATPase involved in DNA repair	0	0	0	3
Bacillosamine/Legionaminic acid biosynthesis aminotransferase PglE; 4-keto-6-deoxy-N-Acetyl-D-hexosaminyl-(Lipid carrier) aminotransferase	0	1	0	3
COGs COG2378	0	0	0	3
Flagellar basal-body rod protein FlgG	0	0	0	3
GDP-mannose 4,6-dehydratase (EC 4.2.1.47)	0	2	0	3
Heparinase II/III-like	0	0	0	3
unknown	0	0	0	3
Transcriptional regulator, LysR family	2	5	1	2
Capsule polysaccharide export protein	1	0	0	2
D-glycero-D-manno-heptose 1-phosphate guanosyltransferase	1	0	0	2
dTDP-4-dehydrorhamnose reductase (EC 1.1.1.133)	1	1	0	2
Flagellar basal-body rod modification protein FlgD	1	0	0	2
Flagellar basal-body rod protein FlgC	1	0	0	2
Flagellar biosynthesis protein FlhA	1	1	0	2
Flagellar P-ring protein FlgI	1	0	0	2
Integration host factor beta subunit	1	1	0	2
O-antigen ligase	1	0	0	2
Asparagine synthetase [glutamine-hydrolyzing] (EC 6.3.5.4)	0	0	2	2
Phage integrase	0	1	1	2
putatve zinc-binding dehydrogenase	0	0	1	2
VapC toxin protein	0	0	1	2
Adenylylsulfate kinase (EC 2.7.1.25)	0	0	0	2
Capsular polysaccharide synthesis enzyme CpsA, sugar transferase	0	1	0	2
Chloramphenicol acetyltransferase (EC 2.3.1.28)	0	0	0	2
Cobalt-zinc-cadmium resistance protein CzcD	0	1	0	2
conserved hypothetical protein	0	1	0	2
DNA double-strand break repair Rad50 ATPase	0	0	0	2
DNA helicase	0	0	0	2
DNA helicase related protein	0	0	0	2
DNA-binding protein	0	0	0	2
FIG01202690: hypothetical protein	0	0	0	2
FIG01210424: hypothetical protein	0	0	0	2
Flagellar biosynthesis protein FlhB	0	1	0	2
Flagellar biosynthesis protein FliP	0	1	0	2
Flagellar biosynthesis protein FliQ	0	1	0	2
Flagellar L-ring protein FlgH	0	0	0	2
lipoprotein, putative	0	1	0	2
Phage tail sheath protein FI	0	0	0	2
Probable Co/Zn/Cd efflux system membrane fusion protein	0	5	0	2
Prophage Clp protease-like protein	0	0	0	2
putative DNA helicase	0	0	0	2
putative glycosyltransferase	0	0	0	2
RbmD, similar to Lipid A core - O-antigen ligase and related enzymes	0	0	0	2
Retron-type RNA-directed DNA polymerase (EC 2.7.7.49)	0	0	0	2
Ribonucleotide reductase of class III (anaerobic), activating protein (EC 1.97.1.4)	0	0	0	2
SAM (And some other nucleotide) binding motif:TPR repeat	0	0	0	2
Serine acetyltransferase (EC 2.3.1.30)	0	1	0	2
Serine/threonine protein phosphatase (EC 3.1.3.16)	0	0	0	2
Single-stranded DNA-binding protein	0	1	0	2
Site-specific recombinase, resolvase family	0	0	0	2
Terminase small subunit	0	0	0	2
Transcription-repair coupling factor (superfamily II helicase)	0	0	0	2
transcriptional regulator	0	2	0	2
Translation-disabling ACNase RloC	0	0	0	2
Transposase and inactivated derivatives	0	3	0	2
tRNA-Arg-CCG	0	0	0	2
tRNA-Phe-GAA	0	0	0	2
WzxE protein	0	0	0	2
Transcriptional regulator, AraC family	7	8	1	1
Imidazole glycerol phosphate synthase amidotransferase subunit (EC 2.4.2.-)	2	0	1	1
Imidazole glycerol phosphate synthase cyclase subunit (EC 4.1.3.-)	2	0	1	1
Capsular polysaccharide ABC transporter, ATP-binding protein KpsT	1	0	1	1
Capsular polysaccharide ABC transporter, permease protein KpsM	1	0	1	1
Capsular polysaccharide export system inner membrane protein KpsE	1	0	1	1
UDP-3-O-[3-hydroxymyristoyl] glucosamine N-acyltransferase (EC 2.3.1.-)	1	0	1	1
2-keto-3-deoxy-D-arabino-heptulosonate-7-phosphate synthase I alpha (EC 2.5.1.54)	1	1	0	1
ATP-dependent DNA helicase RecQ	1	0	0	1
Capsular polysaccharide export system periplasmic protein KpsD	1	0	0	1
Carbon storage regulator	1	0	0	1
Cytochrome c4	1	0	0	1
DNA recombination protein RmuC	1	1	0	1
Ferrichrome-iron receptor	1	0	0	1
Legionaminic acid biosynthesis protein PtmG	1	0	0	1
putative inner membrane protein	1	1	0	1
putative lipoprotein	1	0	0	1
Thiamin biosynthesis lipoprotein ApbE	1	2	0	1
Thymidylate kinase (EC 2.7.4.9)	1	0	0	1
transcriptional regulator, XRE family	1	0	0	1
WbjC	1	0	0	1
Putative predicted metal-dependent hydrolase	0	0	2	1
UTP--glucose-1-phosphate uridylyltransferase (EC 2.7.7.9)	0	0	2	1
2,3,4,5-tetrahydropyridine-2,6-dicarboxylate N-acetyltransferase (EC 2.3.1.89)	0	0	1	1
Bll5287 protein	0	0	1	1
Capsular polysaccharide synthesis enzyme CpsC, polysaccharide export	0	1	1	1
Capsular polysaccharide synthesis enzyme CpsD, exopolysaccharide synthesis	0	1	1	1
Coenzyme F390 synthetase	0	0	1	1
CRISPR-associated protein, Csy2 family	0	0	1	1
CRISPR-associated protein, Csy3 family	0	0	1	1
Error-prone repair protein UmuD	0	0	1	1
FMN-dependent NADH-azoreductase	0	0	1	1
Glutamate-1-semialdehyde aminotransferase (EC 5.4.3.8)	0	0	1	1
Lipid carrier : UDP-N-acetylgalactosaminyltransferase (EC 2.4.1.-) / Alpha-1,3-N-acetylgalactosamine transferase PglA (EC 2.4.1.-); Putative glycosyltransferase	0	0	1	1
Membrane-fusion protein	0	0	1	1
Microbial collagenase, secreted (EC 3.4.24.3)	0	0	1	1
Phage major capsid protein	0	0	1	1
Phage portal protein	0	0	1	1
Phage terminase large subunit	0	0	1	1
Phage terminase, small subunit	0	0	1	1
polysaccharide biosynthesis protein	0	0	1	1
putative ATP-binding protein	0	0	1	1
putative secreted protein	0	0	1	1
SIR2 family protein	0	0	1	1
Type III restriction-modification system methylation subunit (EC 2.1.1.72)	0	0	1	1
Virulence-associated protein vagC	0	0	1	1
3-oxoacyl-[acyl-carrier-protein] synthase, KASIII (EC 2.3.1.41)	0	1	0	1
4-carboxymuconolactone decarboxylase domain/alkylhydroperoxidase AhpD family core domain protein	0	1	0	1
4-oxalocrotonate tautomerase (EC 5.3.2.-)	0	0	0	1
5-methylcytosine-specific restriction enzyme A (EC 3.1.21.-)	0	0	0	1
ABC-type phosphate/phosphonate transport system, periplasmic component	0	0	0	1
Acetoacetyl-CoA reductase (EC 1.1.1.36) of ethylmalonyl-CoA pathway	0	0	0	1
Acetylornithine aminotransferase (EC 2.6.1.11)	0	0	0	1
Acetyltransferase	0	1	0	1
acetyltransferase, putative	0	0	0	1
Acriflavin resistance protein	0	1	0	1
Adenine-specific methyltransferase (EC 2.1.1.72)	0	0	0	1
Adenosine deaminase (EC 3.5.4.4)	0	0	0	1
alpha-2,3-sialyltransferase	0	0	0	1
Aminotransferase	0	0	0	1
ankyrin repeat protein, putative	0	0	0	1
Anticodon nuclease	0	0	0	1
Antirestriction protein	0	0	0	1
Arabinose 5-phosphate isomerase (EC 5.3.1.13)	0	0	0	1
ATP-dependent RNA helicase YejH	0	0	0	1
ATPase, AAA family	0	0	0	1
Bacillosamine/Legionaminic acid biosynthesis N-acetyltrasferase PglD (PseH and NeuD homolog); 4-amino-6-deoxy-N-Acetyl-D-hexosaminyl-(Lipid carrier) acetyltrasferase	0	0	0	1
bacteriocin resistance protein, putative	0	1	0	1
Bifunctional acetyl transferase/isomerase	0	0	0	1
Bipolar DNA helicase	0	0	0	1
capsular polysaccharide biosynthesis protein	0	0	0	1
Capsular polysaccharide export system protein KpsS	0	0	0	1
Capsule biosynthesis protein capA	0	0	0	1
Chitinase (EC 3.2.1.14)	0	0	0	1
Choline binding protein A	0	0	0	1
Chromosome (plasmid) partitioning protein ParA	0	0	0	1
Chromosome segregation ATPase	0	0	0	1
COG1691: NCAIR mutase (PurE)-related proteins	0	0	0	1
Cointegrate resolution protein S	0	0	0	1
Competence protein ComEC/Rec2-related protein	0	0	0	1
Complete genome; segment 14/17	0	0	0	1
Conserved domain protein	0	1	0	1
Conserved hypothetical phage protein	0	0	0	1
conserved protein of unknown function; putative membrane protein	0	0	0	1
CRISPR-associated helicase Cas3, Yersinia-type	0	0	0	1
CRISPR-associated protein, YPO2467 family	0	0	0	1
Cupin 2 conserved barrel domain protein	0	0	0	1
Cytochrome c	0	0	0	1
Cytochrome c family protein	0	1	0	1
Cytochrome c in methylamine utilization cluster	0	0	0	1
DegT/DnrJ/EryC1/StrS aminotransferase	0	0	0	1
DNA alkylation repair enzyme	0	0	0	1
DNA helicase IV	0	0	0	1
DNA primase (EC 2.7.7.-), phage-associated	0	0	0	1
DNA-binding response regulator, AraC family	0	0	0	1
dTDP-4-dehydrorhamnose 3,5-epimerase (EC 5.1.3.13)	0	0	0	1
endonuclease/exonuclease/phosphatase	0	0	0	1
Exopolysaccharide production protein ExoZ	0	0	0	1
extracellular serine protease	0	0	0	1
Fic family protein	0	1	0	1
FIG001353: Acetyltransferase	0	0	0	1
FIG00463558: hypothetical protein	0	0	0	1
FIG00499706: hypothetical protein	0	0	0	1
FIG00513011: hypothetical protein	0	0	0	1
FIG005666: putative helicase	0	0	0	1
FIG00634587: hypothetical protein	0	0	0	1
FIG00847870: hypothetical protein	0	0	0	1
FIG00949980: hypothetical protein	0	0	0	1
FIG01048028: hypothetical protein	0	0	0	1
FIG01060394: hypothetical protein	0	0	0	1
FIG01199920: hypothetical protein	0	0	0	1
FIG01214411: hypothetical protein	0	0	0	1
FIG024006: iron uptake protein	0	0	0	1
FIG032766: hypothetical protein	0	0	0	1
FIG036446: hypothetical protein	0	0	0	1
FIG043818: putative DNA binding protein	0	0	0	1
FIG071193: hypothetical protein	0	0	0	1
FIG123464: Polysaccharide export protein	0	0	0	1
FIG138928: iron-regulated membrane protein	0	0	0	1
Filamentous haemagglutinin	0	0	0	1
Flagellar basal-body rod protein FlgF	0	0	0	1
Flagellar biosynthesis protein FliR	0	1	0	1
Flagellar hook-basal body complex protein FliE	0	1	0	1
Flagellar M-ring protein FliF	0	1	0	1
Flagellar motor switch protein FliN	0	1	0	1
Flagellin protein FlaG	0	1	0	1
Flagellum-specific ATP synthase FliI	0	1	0	1
FOG: GGDEF domain	0	1	0	1
FOG: TPR repeat	0	1	0	1
Galactoside O-acetyltransferase (EC 2.3.1.18)	0	0	0	1
GCN5-related N-acetyltransferase	0	0	0	1
GDP-L-fucose synthetase (EC 1.1.1.271); Colanic acid biosynthesis protein wcaG	0	1	0	1
GDP-mannose 6-dehydrogenase (EC 1.1.1.132)	0	0	0	1
GDP-mannose mannosyl hydrolase (EC 3.6.1.-)	0	1	0	1
Gfa-like protein	0	1	0	1
Gll3707 protein	0	0	0	1
glutaredoxin 2	0	0	0	1
Glycerol-3-phosphate cytidylyltransferase (EC 2.7.7.39)	0	0	0	1
Glycosaminoglycan attachment site	0	0	0	1
glycosyl transferase	0	0	0	1
glycosyl transferase, family 2	0	0	0	1
Glycosyl transferase, group 1 family protein	0	0	0	1
GPW/gp25 family protein	0	0	0	1
Ham1 family protein	0	0	0	1
Heavy metal RND efflux outer membrane protein, CzcC family	0	4	0	1
helicase, putative	0	0	0	1
heparinase III protein	0	0	0	1
HigA protein (antitoxin to HigB)	0	1	0	1
HIPA PROTEIN	0	1	0	1
Histidinol-phosphate aminotransferase (EC 2.6.1.9)	0	0	0	1
HIT family hydrolase	0	0	0	1
HpcH/HpaI aldolase	0	0	0	1
HTH-type transcriptional regulator prtR	0	0	0	1
Hydrogenase-4 transcriptional activator	0	0	0	1
Hydrolases of the alpha/beta superfamily	0	0	0	1
hypothetical and glycosyltransferase fusion protein	0	0	0	1
Hypothetical protein VpsJ	0	0	0	1
identified by sequence similarity; putative; ORF located using Blastx/Glimmer	0	0	0	1
IncF plasmid conjugative transfer pilus assembly protein TraC	0	0	0	1
IncF plasmid conjugative transfer pilus assembly protein TraH	0	0	0	1
IncF plasmid conjugative transfer pilus assembly protein TraU	0	0	0	1
IncF plasmid conjugative transfer pilus assembly protein TraW	0	0	0	1
IncF plasmid conjugative transfer protein TraN	0	0	0	1
Integral membrane protein	0	0	0	1
Integron integrase IntIPac	0	0	0	1
Legionaminic acid biosynthesis protein PtmA	0	0	0	1
Legionaminic acid biosynthesis protein PtmF	0	0	0	1
Legionaminic acid cytidylyltransferase (EC 2.7.7.43)	0	0	0	1
Lipopolysaccharide biosynthesis protein	0	0	0	1
Lipopolysaccharide biosynthesis protein WzxC	0	0	0	1
lipopolysaccharide biosynthesis RfbU-related protein	0	0	0	1
Maltose O-acetyltransferase (EC 2.3.1.79)	0	0	0	1
membrane protein	0	0	0	1
Membrane protein involved in the export of O-antigen, teichoic acid lipoteichoic acids	0	0	0	1
Metal-dependent phosphohydrolase, HD subdomain	0	0	0	1
Methionyl-tRNA formyltransferase (EC 2.1.2.9)	0	1	0	1
Methylamine dehydrogenase heavy chain precursor (EC 1.4.99.3)	0	0	0	1
Methylamine dehydrogenase light chain precursor (EC 1.4.99.3)	0	0	0	1
Methylamine utilization protein MauD	0	0	0	1
Methylamine utilization protein MauE	0	0	0	1
Methylamine utilization protein mauG precursor	0	0	0	1
Mlr3471 protein	0	0	0	1
Modification methylase PstI (EC 2.1.1.72)	0	0	0	1
Molybdenum cofactor biosynthesis enzyme	0	0	0	1
Mrr restriction system protein	0	0	0	1
Multi antimicrobial extrusion protein (Na(+)/drug antiporter), MATE family of MDR efflux pumps	0	1	0	1
Multimeric flavodoxin WrbA	0	1	0	1
N-acetylmannosaminyltransferase (EC 2.4.1.187)	0	0	0	1
Nickel-dependent superoxide dismutase (EC 1.15.1.1)	0	0	0	1
Nitrate reductase cytochrome c550-type subunit	0	0	0	1
Nitrogen regulation protein NtrC	0	0	0	1
Nodulation protein nolO (EC 2.1.3.-)	0	0	0	1
Nucleotidyltransferase (EC 2.7.7.-)	0	0	0	1
nucleotidyltransferase substrate binding protein, HI0074 family	0	0	0	1
O-antigen flippase Wzx	0	0	0	1
O-antigen polymerase	0	0	0	1
Octanoate-[acyl-carrier-protein]-protein-N-octanoyltransferase	0	0	0	1
Organic hydroperoxide resistance transcriptional regulator	0	0	0	1
Ornithine aminotransferase (EC 2.6.1.13); Succinylornithine transaminase (EC 2.6.1.81); Acetylornithine aminotransferase (EC 2.6.1.11)	0	0	0	1
Oxidoreductase, N-terminal:Oxidoreductase, C-terminal	0	0	0	1
Patatin-like protein	0	0	0	1
penicillin amidase family protein	0	0	0	1
Periplasmic nitrate reductase precursor (EC 1.7.99.4)	0	0	0	1
Permease of the drug/metabolite transporter (DMT) superfamily	0	0	0	1
Perosamine synthase	0	0	0	1
Pesticin domain protein	0	0	0	1
Phage capsid scaffolding protein # Fam Scf032	0	0	0	1
Phage DNA binding protein Roi	0	0	0	1
Phage endolysin	0	0	0	1
Phage head completion-stabilization protein	0	0	0	1
Phage holin	0	0	0	1
Phage major capsid protein #Fam0003	0	0	0	1
Phage recombination protein Beta	0	0	0	1
Phage related protein	0	0	0	1
Phage tail fibers	0	0	0	1
Phage terminase, ATPase subunit	0	0	0	1
Phage terminase, large subunit	0	0	0	1
Phage-related tail protein	0	0	0	1
Phospholipid-lipopolysaccharide ABC transporter	0	0	0	1
pleiotropic regulatory protein	0	0	0	1
Polysaccharide biosynthesis domain protein	0	0	0	1
possible DNA helicase	0	0	0	1
Predicted SAM-dependent methyltransferases	0	0	0	1
Predicted transcriptional regulator	0	0	0	1
PREDICTED: hypothetical protein	0	0	0	1
Presumed portal vertex protein	0	0	0	1
probable acetyltransferase	0	0	0	1
Probable glycosyl transferase (EC 2.4.-.-)	0	0	0	1
Probable O-antigen acetylase	0	0	0	1
probable periplasmic protein NMA1084	0	0	0	1
Probable poly(beta-D-mannuronate) O-acetylase (EC 2.3.1.-)	0	1	0	1
probably aromatic ring hydroxylating enzyme, evidenced by COGnitor; PaaD-like protein (DUF59) involved in Fe-S cluster assembly	0	0	0	1
Proposed peptidoglycan lipid II flippase MurJ	0	0	0	1
Protein involved in meta-pathway of phenol degradation	0	0	0	1
protein of unknown function DUF262	0	0	0	1
Pseudaminic acid cytidylyltransferase (EC 2.7.7.43)	0	1	0	1
Putative 2-component regulator	0	0	0	1
putative adenylate cyclase	0	0	0	1
Putative ATP binding protein SugR	0	0	0	1
Putative bacteriophage protein	0	0	0	1
putative cholesterol oxidase	0	0	0	1
putative cytoplasmic protein	0	1	0	1
putative glycosyltransferase - possibly involved in cell wall localization and side chain formation of rhamnose-glucose polysaccharide	0	0	0	1
Putative hemolysin	0	1	0	1
putative NADH dehydrogenase/NAD(P)H nitroreductase	0	0	0	1
putative outermembrane protein	0	2	0	1
Putative polymerase	0	0	0	1
putative restriction endonuclease	0	0	0	1
Putative transcriptional regulator	0	0	0	1
putative; ORF located using Glimmer/Genemark	0	0	0	1
RelA/SpoT domain protein	0	0	0	1
RNA polymerase sigma factor for flagellar operon	0	1	0	1
RNA polymerase sigma factor SigB	0	0	0	1
SECRETION ACTIVATOR PROTEIN	0	0	0	1
serine/threonine kinase	0	0	0	1
Sialidase (EC 3.2.1.18)	0	0	0	1
Signal recognition particle receptor protein FtsY (=alpha subunit) (TC 3.A.5.1.1)	0	0	0	1
site-specific DNA-methyltransferase	0	0	0	1
SMC domain protein	0	0	0	1
Sterol desaturase	0	1	0	1
T4-like phage baseplate hub + tail lysozyme	0	0	0	1
terminase	0	0	0	1
Terminase large subunit	0	0	0	1
TPR Domain containing protein	0	0	0	1
Transcription activator gutR	0	0	0	1
Transcriptional activator RfaH	0	0	0	1
transcriptional factor	0	0	0	1
transcriptional regulator-like protein	0	0	0	1
transcriptional regulator, LuxR autoinducer regulated family	0	0	0	1
transferase, putative	0	0	0	1
Transketolase, C-terminal section (EC 2.2.1.1)	0	0	0	1
Transketolase, N-terminal section (EC 2.2.1.1)	0	0	0	1
tRNA-Arg-CCT	0	1	0	1
tRNA-Leu-CAA	0	0	0	1
tRNA-Met-CAT	0	2	0	1
tRNA-Pro-GGG	0	1	0	1
Type I secretion outer membrane protein, TolC precursor	0	0	0	1
Type II restriction endonuclease	0	0	0	1
type II site-specific deoxyribonuclease	0	0	0	1
type III restriction enzyme, res subunit	0	0	0	1
Type III restriction enzyme, res subunit:DEAD/DEAH box helicase, N-terminal	0	0	0	1
Type III restriction-modification system restriction subunit (EC 3.1.21.5)	0	0	0	1
Type III secretion inner membrane protein (YscT,HrcT,SpaR,EscT,EpaR1,homologous to flagellar export components)	0	0	0	1
Tyrosine-protein kinase EpsD (EC 2.7.10.2)	0	0	0	1
UDP-glucose/GDP-mannose dehydrogenase family protein	0	0	0	1
UDP-N-acetyl-D-mannosaminuronate dehydrogenase	0	0	0	1
Uncharacterized protein conserved in bacteria, NMA0228-like	0	0	0	1
Undecaprenyl-phosphate galactosephosphotransferase (EC 2.7.8.6)	0	1	0	1
Undecaprenyl-phosphate N-acetylglucosaminyl 1-phosphate transferase (EC 2.7.8.-)	0	0	0	1
unnamed protein product	0	0	0	1
VgrG protein	0	0	0	1
virulence associated protein C	0	0	0	1
WblR protein	0	0	0	1
Signal transduction histidine kinase	4	4	0	0
diguanylate cyclase/phosphodiesterase (GGDEF & EAL domains) with PAS/PAC sensor(s)	3	5	1	0
Methyl-accepting chemotaxis protein	3	6	1	0
Bacterioferritin	3	0	0	0
Chemotaxis regulator - transmits chemoreceptor signals to flagelllar motor components CheY	3	2	0	0
Enoyl-CoA hydratase (EC 4.2.1.17)	3	2	0	0
Response regulator	3	2	0	0
sensory box histidine kinase/response regulator	3	3	0	0
ABC transporter, ATP-binding protein	2	4	1	0
Long-chain-fatty-acid--CoA ligase (EC 6.2.1.3)	2	1	1	0
putative cytochrome P450 hydroxylase	2	0	1	0
18K peptidoglycan-associated outer membrane lipoprotein; Peptidoglycan-associated lipoprotein precursor; Outer membrane protein P6; OmpA/MotB precursor	2	0	0	0
2-dehydropantoate 2-reductase (EC 1.1.1.169)	2	2	0	0
5-methyltetrahydrofolate--homocysteine methyltransferase (EC 2.1.1.13)	2	0	0	0
Acyl carrier protein	2	0	0	0
Adenylate cyclase (EC 4.6.1.1)	2	2	0	0
Alginate biosynthesis protein Alg8	2	0	0	0
Chemotaxis protein CheV (EC 2.7.3.-)	2	1	0	0
DNA-binding protein HU-beta	2	1	0	0
FKBP-type peptidyl-prolyl cis-trans isomerase / Macrophage infectivity potentiator	2	0	0	0
Flagellar motor rotation protein MotA	2	2	0	0
Flagellar motor rotation protein MotB	2	1	0	0
Glutaredoxin	2	2	0	0
Isovaleryl-CoA dehydrogenase (EC 1.3.99.10)	2	1	0	0
Methyl-accepting chemotaxis protein I (serine chemoreceptor protein)	2	1	0	0
Methylcrotonyl-CoA carboxylase carboxyl transferase subunit (EC 6.4.1.4)	2	0	0	0
Methylglutaconyl-CoA hydratase (EC 4.2.1.18)	2	0	0	0
MotA/TolQ/ExbB proton channel family protein	2	2	0	0
Nitrite reductase [NAD(P)H] large subunit (EC 1.7.1.4)	2	0	0	0
Nitrite reductase [NAD(P)H] small subunit (EC 1.7.1.4)	2	0	0	0
Outer membrane vitamin B12 receptor BtuB	2	0	0	0
Peptidyl-prolyl cis-trans isomerase PpiA precursor (EC 5.2.1.8)	2	1	0	0
Positive regulator of CheA protein activity (CheW)	2	2	0	0
Ribosomal large subunit pseudouridine synthase D (EC 4.2.1.70)	2	1	0	0
Sensory box/GGDEF family protein	2	0	0	0
Short-chain alcohol dehydrogenase family	2	0	0	0
Signal transduction histidine kinase CheA (EC 2.7.3.-)	2	2	0	0
TonB system biopolymer transport component; Chromosome segregation ATPase	2	2	0	0
Twitching motility protein PilT	2	2	0	0
Alkyl hydroperoxide reductase subunit C-like protein	1	0	1	0
ATP-grasp enzyme-like protein	1	0	1	0
DNA polymerase I (EC 2.7.7.7)	1	0	1	0
Glutamate synthase [NADPH] large chain (EC 1.4.1.13)	1	1	1	0
Homoserine kinase (EC 2.7.1.39)	1	1	1	0
Membrane-bound lytic murein transglycosylase C precursor (EC 3.2.1.-)	1	1	1	0
Na+/H+ antiporter NhaA type	1	0	1	0
putative acetyltransferase	1	0	1	0
(3R)-hydroxymyristoyl-[acyl carrier protein] dehydratase (EC 4.2.1.-)	1	0	0	0
[Protein-PII] uridylyltransferase (EC 2.7.7.59)	1	0	0	0
1-hydroxy-2-methyl-2-(E)-butenyl 4-diphosphate synthase (EC 1.17.7.1)	1	1	0	0
2-C-methyl-D-erythritol 2,4-cyclodiphosphate synthase (EC 4.6.1.12)	1	0	0	0
2-hydroxy-3-oxopropionate reductase (EC 1.1.1.60)	1	2	0	0
2-isopropylmalate synthase (EC 2.3.3.13)	1	0	0	0
2-octaprenyl-3-methyl-6-methoxy-1,4-benzoquinol hydroxylase (EC 1.14.13.-)	1	0	0	0
2,3,4,5-tetrahydropyridine-2,6-dicarboxylate N-succinyltransferase (EC 2.3.1.117)	1	0	0	0
23S rRNA (guanine-N-2-) -methyltransferase rlmL EC 2.1.1.-)	1	1	0	0
3-demethylubiquinone-9 3-methyltransferase (EC 2.1.1.64)	1	1	0	0
3-deoxy-manno-octulosonate cytidylyltransferase (EC 2.7.7.38)	1	1	0	0
3-hydroxydecanoyl-[acyl-carrier-protein] dehydratase (EC 4.2.1.60)	1	0	0	0
3-isopropylmalate dehydratase large subunit (EC 4.2.1.33)	1	1	0	0
3-isopropylmalate dehydrogenase (EC 1.1.1.85)	1	1	0	0
3-ketoacyl-CoA thiolase (EC 2.3.1.16)	1	0	0	0
3-ketoacyl-CoA thiolase (EC 2.3.1.16) @ Acetyl-CoA acetyltransferase (EC 2.3.1.9)	1	0	0	0
3-oxoacyl-[acyl-carrier protein] reductase (EC 1.1.1.100)	1	1	0	0
3-oxoacyl-[acyl-carrier-protein] synthase, KASI (EC 2.3.1.41)	1	1	0	0
4-hydroxy-2-oxovalerate aldolase (EC 4.1.3.39)	1	0	0	0
4-hydroxyphenylpyruvate dioxygenase (EC 1.13.11.27)	1	0	0	0
5-nucleotidase SurE (EC 3.1.3.5)	1	0	0	0
8-amino-7-oxononanoate synthase (EC 2.3.1.47)	1	1	0	0
ABC transporter (iron.B12.siderophore.hemin) , periplasmic substrate-binding component	1	0	0	0
ABC transporter (iron.B12.siderophore.hemin) , permease component	1	0	0	0
ABC transporter, periplasmic spermidine putrescine-binding protein PotD (TC 3.A.1.11.1)	1	0	0	0
Acetyl-CoA acetyltransferase	1	0	0	0
Acetylglutamate kinase (EC 2.7.2.8)	1	1	0	0
acetyltransferase, GNAT family	1	1	0	0
Acyl-CoA thioesterase II (EC 3.1.2.-)	1	1	0	0
Adenosylhomocysteinase (EC 3.3.1.1)	1	0	0	0
Adenosylmethionine-8-amino-7-oxononanoate aminotransferase (EC 2.6.1.62)	1	1	0	0
ADP-heptose synthase (EC 2.7.-.-) / D-glycero-beta-D-manno-heptose 7-phosphate kinase	1	1	0	0
Alanyl-tRNA synthetase (EC 6.1.1.7)	1	0	0	0
Aminopeptidase N	1	1	0	0
Anthranilate phosphoribosyltransferase (EC 2.4.2.18)	1	0	0	0
Argininosuccinate lyase (EC 4.3.2.1)	1	1	0	0
Arsenate reductase (EC 1.20.4.1)	1	1	0	0
Aspartate 1-decarboxylase (EC 4.1.1.11)	1	0	0	0
Aspartate carbamoyltransferase (EC 2.1.3.2)	1	1	0	0
Aspartokinase (EC 2.7.2.4)	1	0	0	0
Aspartyl-tRNA(Asn) amidotransferase subunit C (EC 6.3.5.6) @ Glutamyl-tRNA(Gln) amidotransferase subunit C (EC 6.3.5.7)	1	0	0	0
ATP phosphoribosyltransferase regulatory subunit (EC 2.4.2.17)	1	1	0	0
ATP synthase beta chain (EC 3.6.3.14)	1	0	0	0
ATP synthase delta chain (EC 3.6.3.14)	1	0	0	0
ATP synthase epsilon chain (EC 3.6.3.14)	1	0	0	0
ATP synthase gamma chain (EC 3.6.3.14)	1	0	0	0
ATP-binding protein of ABC transporter	1	0	0	0
ATP-dependent 23S rRNA helicase DbpA	1	0	0	0
ATP-dependent Clp protease proteolytic subunit (EC 3.4.21.92)	1	0	0	0
ATP-dependent DNA helicase RecG (EC 3.6.1.-)	1	0	0	0
ATP-dependent protease La (EC 3.4.21.53) Type II	1	0	0	0
B12 binding domain / kinase domain / Methylmalonyl-CoA mutase (EC 5.4.99.2)	1	0	0	0
BarA-associated response regulator UvrY (= GacA = SirA)	1	0	0	0
BatA (Bacteroides aerotolerance operon)	1	1	0	0
Biopolymer transport protein ExbD/TolR	1	1	0	0
Biotin synthesis protein BioC	1	1	0	0
Butyryl-CoA dehydrogenase (EC 1.3.8.1)	1	0	0	0
C4-type zinc finger protein, DksA/TraR family	1	0	0	0
Carbamoyl-phosphate synthase large chain (EC 6.3.5.5)	1	0	0	0
Carbamoyl-phosphate synthase small chain (EC 6.3.5.5)	1	1	0	0
CDP-abequose synthase (Fragment)	1	0	0	0
Cell division protein BolA	1	1	0	0
Cell division protein FtsA	1	1	0	0
Cell division protein FtsI [Peptidoglycan synthetase] (EC 2.4.1.129)	1	1	0	0
Cell division protein FtsZ (EC 3.4.24.-)	1	1	0	0
Cell division trigger factor (EC 5.2.1.8)	1	0	0	0
Chemotaxis protein CheC -- inhibitor of MCP methylation	1	2	0	0
Chemotaxis protein methyltransferase CheR (EC 2.1.1.80)	1	2	0	0
Chemotaxis response regulator protein-glutamate methylesterase CheB (EC 3.1.1.61)	1	2	0	0
Chemotaxis signal transduction protein	1	0	0	0
CheW domain protein	1	1	0	0
Choline dehydrogenase (EC 1.1.99.1)	1	1	0	0
Chorismate--pyruvate lyase (EC 4.1.3.40)	1	0	0	0
Chromosome (plasmid) partitioning protein ParA / Sporulation initiation inhibitor protein Soj	1	2	0	0
Chromosome partition protein smc	1	0	0	0
Cobalt-zinc-cadmium resistance protein CzcA; Cation efflux system protein CusA	1	4	0	0
Cobalt/zinc/cadmium efflux RND transporter, membrane fusion protein, CzcB family	1	0	0	0
COG0398: uncharacterized membrane protein / PF00070 family, FAD-dependent NAD(P)-disulphide oxidoreductase	1	0	0	0
COG0553: Superfamily II DNA/RNA helicases, SNF2 family	1	0	0	0
COG0613, Predicted metal-dependent phosphoesterases (PHP family)	1	1	0	0
COG1496: Uncharacterized conserved protein	1	1	0	0
COG2110, Macro domain, possibly ADP-ribose binding module	1	0	0	0
Cold shock protein CspE	1	0	0	0
Cold shock protein CspG	1	1	0	0
Colicin V production protein	1	1	0	0
ComA operon protein 2	1	0	0	0
conserved protein of unknown function	1	0	0	0
Copper metallochaperone, bacterial analog of Cox17 protein	1	1	0	0
CTP synthase (EC 6.3.4.2)	1	1	0	0
Cyanoglobin; Hemoglobin-like protein HbN	1	1	0	0
Cys regulon transcriptional activator CysB	1	1	0	0
Cysteine desulfurase (EC 2.8.1.7)	1	2	0	0
Cysteine synthase (EC 2.5.1.47)	1	1	0	0
Cytochrome c-type biogenesis protein CcmE, heme chaperone	1	0	0	0
Cytochrome oxidase biogenesis protein Sco1/SenC/PrrC, putative copper metallochaperone	1	1	0	0
Cytochrome oxidase biogenesis protein Surf1, facilitates heme A insertion	1	0	0	0
cytosolic long-chain acyl-CoA thioester hydrolase family protein	1	0	0	0
D-alanyl-D-alanine carboxypeptidase (EC 3.4.16.4)	1	1	0	0
Desferrioxamine E biosynthesis protein DesA @ Siderophore biosynthesis L-2,4-diaminobutyrate decarboxylase	1	0	0	0
Dethiobiotin synthetase (EC 6.3.3.3)	1	1	0	0
Diacylglycerol kinase (EC 2.7.1.107)	1	0	0	0
Diadenosine tetraphosphatase and related serine/threonine protein phosphatases	1	1	0	0
Diguanylate cyclase/phosphodiesterase domain 2	1	0	0	0
Dihydrolipoamide acyltransferase component of branched-chain alpha-keto acid dehydrogenase complex (EC 2.3.1.168)	1	0	0	0
Dihydrolipoamide dehydrogenase of 2-oxoglutarate dehydrogenase (EC 1.8.1.4)	1	1	0	0
Dihydroorotase (EC 3.5.2.3)	1	1	0	0
Dihydropteroate synthase (EC 2.5.1.15)	1	0	0	0
Dipeptide-binding ABC transporter, periplasmic substrate-binding component (TC 3.A.1.5.2)	1	1	0	0
Dna binding response regulator PrrA (RegA)	1	0	0	0
DNA ligase (ATP) (EC 6.5.1.1)	1	0	0	0
DNA ligase (EC 6.5.1.2)	1	1	0	0
DNA polymerase III delta prime subunit (EC 2.7.7.7)	1	0	0	0
DNA polymerase IV (EC 2.7.7.7)	1	0	0	0
DNA recombination and repair protein RecF	1	1	0	0
DNA recombination and repair protein RecO	1	0	0	0
DNA repair protein RadA	1	1	0	0
DNA uptake protein	1	0	0	0
DNA-directed DNA polymerase	1	0	0	0
DNA-directed RNA polymerase alpha subunit (EC 2.7.7.6)	1	0	0	0
DNA-directed RNA polymerase beta' subunit (EC 2.7.7.6)	1	1	0	0
DsbA-like thioredoxin domain protein	1	0	0	0
Efflux transporter, RND family, MFP subunit	1	0	0	0
Efflux transporter, RND family, MFP subunit, AcrA/E family	1	0	0	0
Electron transfer flavoprotein-ubiquinone oxidoreductase (EC 1.5.5.1)	1	0	0	0
Electron transfer flavoprotein, alpha subunit	1	0	0	0
Electron transport complex protein RnfE	1	0	0	0
Electron transport complex protein RnfG	1	1	0	0
Endonuclease III (EC 4.2.99.18)	1	0	0	0
Enolase (EC 4.2.1.11)	1	1	0	0
Epoxyqueuosine (oQ) reductase QueG	1	0	0	0
Esterase/lipase/thioesterase family protein	1	2	0	0
Excinuclease ABC subunit B	1	0	0	0
Excinuclease ABC subunit C	1	0	0	0
Exodeoxyribonuclease III (EC 3.1.11.2)	1	0	0	0
Exodeoxyribonuclease V alpha chain (EC 3.1.11.5)	1	0	0	0
Fe-S oxidoreductase	1	1	0	0
Ferredoxin, 2Fe-2S	1	0	0	0
Ferric iron ABC transporter, iron-binding protein	1	0	0	0
Ferrochelatase, protoheme ferro-lyase (EC 4.99.1.1)	1	1	0	0
FIG000506: Predicted P-loop-containing kinase	1	0	0	0
FIG000859: hypothetical protein YebC	1	0	0	0
FIG000906: Predicted Permease	1	0	0	0
FIG001587: exported protein	1	1	0	0
FIG001592: Phosphocarrier protein kinase/phosphorylase, nitrogen regulation associated	1	1	0	0
FIG002473: Protein YcaR in KDO2-Lipid A biosynthesis cluster	1	0	0	0
FIG003620: Proteophosphoglycan precursor (Fragment)	1	0	0	0
FIG004453: protein YceG like	1	0	0	0
FIG005107: hypothetical protein	1	1	0	0
FIG005121: SAM-dependent methyltransferase (EC 2.1.1.-)	1	1	0	0
FIG00516073: hypothetical protein	1	0	0	0
FIG005548: transport protein	1	1	0	0
FIG00786500: hypothetical protein	1	0	0	0
FIG00857466: hypothetical protein	1	0	0	0
FIG00923625: hypothetical protein	1	0	0	0
FIG016425: Soluble lytic murein transglycosylase and related regulatory proteins (some contain LysM/invasin domains)	1	1	0	0
FIG023103: Predicted transmembrane protein	1	1	0	0
FIG023677: hypothetical protein	1	1	0	0
FIG028220: hypothetical protein co-occurring with HEAT repeat protein	1	0	0	0
FIG071646: Sugar transferase	1	0	0	0
FIG136845: Rhodanese-related sulfurtransferase	1	0	0	0
FIG137360: hypothetical protein	1	1	0	0
FIG140336: TPR domain protein	1	0	0	0
FIG146278: Maf/YceF/YhdE family protein	1	1	0	0
FIGfam010717	1	1	0	0
Flagellar basal-body P-ring formation protein FlgA	1	0	0	0
Flagellar biosynthesis protein FliS	1	1	0	0
Flagellar motor switch protein FliG	1	1	0	0
Flagellin protein FlaB	1	0	0	0
FOG: WD40 repeat	1	0	0	0
Folate-dependent protein for Fe/S cluster synthesis/repair in oxidative stress	1	1	0	0
Fumarate and nitrate reduction regulatory protein	1	0	0	0
General secretion pathway protein D	1	1	0	0
Geranyl-CoA carboxylase biotin-containing subunit	1	0	0	0
Geranyl-CoA carboxylase carboxyl transferase subunit	1	0	0	0
Glucans biosynthesis protein C (EC 2.1.-.-)	1	0	0	0
Glucose-6-phosphate 1-dehydrogenase (EC 1.1.1.49)	1	0	0	0
Glutamate-ammonia-ligase adenylyltransferase (EC 2.7.7.42)	1	1	0	0
Glutamine amidotransferase, class-II	1	0	0	0
Glutathione S-transferase (EC 2.5.1.18)	1	1	0	0
Glutathione-regulated potassium-efflux system ATP-binding protein	1	1	0	0
Glutathione-regulated potassium-efflux system protein KefB	1	0	0	0
Glycerol kinase (EC 2.7.1.30)	1	0	0	0
Glycerol-3-phosphate acyltransferase (EC 2.3.1.15)	1	0	0	0
GNAT family acetyltransferase YjcF	1	0	0	0
GTP cyclohydrolase I (EC 3.5.4.16) type 2	1	0	0	0
GTP-binding and nucleic acid-binding protein YchF	1	0	0	0
HD-GYP domain (HD superfamily hydrolase)	1	1	0	0
Heat shock (predicted periplasmic) protein YciM, precursor	1	1	0	0
Heme A synthase, cytochrome oxidase biogenesis protein Cox15-CtaA	1	0	0	0
Heme O synthase, protoheme IX farnesyltransferase (EC 2.5.1.-) COX10-CtaB	1	0	0	0
Histidine kinase	1	0	0	0
Histidyl-tRNA synthetase (EC 6.1.1.21)	1	0	0	0
Hydroxypyruvate isomerase (EC 5.3.1.22)	1	1	0	0
Hypothetical nudix hydrolase YeaB	1	1	0	0
Hypothetical protein YaeJ with similarity to translation release factor	1	0	0	0
Hypothetical protein YggS, proline synthase co-transcribed bacterial homolog PROSC	1	1	0	0
Hypoxanthine-guanine phosphoribosyltransferase (EC 2.4.2.8)	1	0	0	0
IMP cyclohydrolase (EC 3.5.4.10) / Phosphoribosylaminoimidazolecarboxamide formyltransferase (EC 2.1.2.3)	1	1	0	0
Indole-3-glycerol phosphate synthase (EC 4.1.1.48)	1	0	0	0
Inner membrane protein translocase component YidC, long form	1	0	0	0
Iron-sulfur cluster assembly ATPase protein SufC	1	0	0	0
Iron-sulfur cluster regulator IscR	1	1	0	0
Isohexenylglutaconyl-CoA hydratase	1	0	0	0
Isoleucyl-tRNA synthetase (EC 6.1.1.5)	1	0	0	0
Kef-type K+ transport system, predicted NAD-binding component	1	0	0	0
L-carnitine dehydratase/bile acid-inducible protein F	1	0	0	0
LemA family protein	1	0	0	0
Leucine dehydrogenase (EC 1.4.1.9)	1	0	0	0
Lipid A core - O-antigen ligase and related enzymes	1	0	0	0
Lipid A export ATP-binding/permease protein MsbA	1	0	0	0
Lipid A export ATP-binding/permease protein MsbA (EC 3.6.3.25)	1	1	0	0
Lipid-A-disaccharide synthase (EC 2.4.1.182)	1	0	0	0
Lipopolysaccharide ABC transporter, ATP-binding protein LptB	1	0	0	0
Lipopolysaccharide biosynthesis chain length determinant protein	1	0	0	0
Lipoprotein NlpD	1	1	0	0
Lipoprotein signal peptidase (EC 3.4.23.36)	1	0	0	0
LptA, protein essential for LPS transport across the periplasm	1	0	0	0
LSU ribosomal protein L11p (L12e)	1	1	0	0
LSU ribosomal protein L14p (L23e)	1	0	0	0
LSU ribosomal protein L15p (L27Ae)	1	0	0	0
LSU ribosomal protein L16p (L10e)	1	0	0	0
LSU ribosomal protein L17p	1	0	0	0
LSU ribosomal protein L18p (L5e)	1	0	0	0
LSU ribosomal protein L20p	1	1	0	0
LSU ribosomal protein L21p	1	1	0	0
LSU ribosomal protein L22p (L17e)	1	0	0	0
LSU ribosomal protein L23p (L23Ae)	1	0	0	0
LSU ribosomal protein L24p (L26e)	1	0	0	0
LSU ribosomal protein L27p	1	1	0	0
LSU ribosomal protein L29p (L35e)	1	0	0	0
LSU ribosomal protein L2p (L8e)	1	0	0	0
LSU ribosomal protein L30p (L7e)	1	0	0	0
LSU ribosomal protein L31p	1	0	0	0
LSU ribosomal protein L32p	1	0	0	0
LSU ribosomal protein L33p @ LSU ribosomal protein L33p, zinc-independent	1	1	0	0
LSU ribosomal protein L34p	1	1	0	0
LSU ribosomal protein L35p	1	1	0	0
LSU ribosomal protein L36p	1	0	0	0
LSU ribosomal protein L3p (L3e)	1	0	0	0
LSU ribosomal protein L4p (L1e)	1	0	0	0
LSU ribosomal protein L5p (L11e)	1	0	0	0
LSU ribosomal protein L6p (L9e)	1	0	0	0
Lysyl-lysine 2,3-aminomutase	1	0	0	0
Lysyl-tRNA synthetase (class II) (EC 6.1.1.6)	1	1	0	0
Malonyl CoA-acyl carrier protein transacylase (EC 2.3.1.39)	1	0	0	0
MaoC family protein	1	0	0	0
Membrane alanine aminopeptidase N (EC 3.4.11.2)	1	1	0	0
membrane protein, putative	1	1	0	0
Membrane-associated zinc metalloprotease	1	0	0	0
Metal-dependent hydrolase YbeY, involved in rRNA and/or ribosome maturation and assembly	1	0	0	0
Metal-dependent hydrolases of the beta-lactamase superfamily I	1	0	0	0
Metallo-beta-lactamase family protein, RNA-specific	1	1	0	0
Methionine aminopeptidase (EC 3.4.11.18)	1	0	0	0
Methylmalonyl-CoA epimerase (EC 5.1.99.1)	1	0	0	0
Modification methylase DdeI	1	0	0	0
Molybdenum cofactor biosynthesis protein MoaB	1	1	0	0
Molybdenum cofactor biosynthesis protein MoaC	1	1	0	0
Molybdenum cofactor biosynthesis protein MoaD	1	1	0	0
Molybdenum cofactor biosynthesis protein MoaE	1	1	0	0
multi-sensor hybrid histidine kinase	1	0	0	0
Multimodular transpeptidase-transglycosylase (EC 2.4.1.129) (EC 3.4.-.-)	1	0	0	0
N-acetylglucosamine-1-phosphate uridyltransferase (EC 2.7.7.23) / Glucosamine-1-phosphate N-acetyltransferase (EC 2.3.1.157)	1	0	0	0
N-acetylglutamate synthase (EC 2.3.1.1)	1	1	0	0
N-succinyl-L,L-diaminopimelate aminotransferase alternative (EC 2.6.1.17)	1	1	0	0
Na(+)-translocating NADH-quinone reductase subunit A (EC 1.6.5.-)	1	1	0	0
Na(+)-translocating NADH-quinone reductase subunit E (EC 1.6.5.-)	1	1	0	0
Na(+)-translocating NADH-quinone reductase subunit F (EC 1.6.5.-)	1	1	0	0
Na+/H+ antiporter NhaB	1	0	0	0
NAD synthetase (EC 6.3.1.5) / Glutamine amidotransferase chain of NAD synthetase	1	0	0	0
NAD-dependent glyceraldehyde-3-phosphate dehydrogenase (EC 1.2.1.12)	1	0	0	0
NAD/FAD-utilizing enzyme apparently involved in cell division	1	0	0	0
NADP-dependent malic enzyme (EC 1.1.1.40)	1	0	0	0
NADPH dependent preQ0 reductase (EC 1.7.1.13)	1	0	0	0
NADPH-dependent glyceraldehyde-3-phosphate dehydrogenase (EC 1.2.1.13)	1	1	0	0
Nitrate/nitrite transporter	1	0	0	0
Nucleoside diphosphate kinase (EC 2.7.4.6)	1	1	0	0
Nudix-like NDP and NTP phosphohydrolase YmfB	1	0	0	0
Oligopeptidase A (EC 3.4.24.70)	1	0	0	0
Oligopeptide transport system permease protein OppB (TC 3.A.1.5.1)	1	0	0	0
Orotate phosphoribosyltransferase (EC 2.4.2.10)	1	0	0	0
Orotidine 5'-phosphate decarboxylase (EC 4.1.1.23)	1	1	0	0
OsmC/Ohr family protein	1	0	0	0
Outer membrane lipoprotein LolB	1	0	0	0
Outer membrane lipoprotein omp16 precursor	1	0	0	0
Outer membrane protein	1	1	0	0
Outer membrane protein H precursor	1	0	0	0
Outer membrane protein NlpB, lipoprotein component of the protein assembly complex (forms a complex with YaeT, YfiO, and YfgL); Lipoprotein-34 precursor	1	0	0	0
Outer membrane protein YfgL, lipoprotein component of the protein assembly complex (forms a complex with YaeT, YfiO, and NlpB)	1	1	0	0
Oxaloacetate decarboxylase alpha chain (EC 4.1.1.3)	1	1	0	0
Oxygen-insensitive NADPH nitroreductase (EC 1.-.-.-)	1	0	0	0
Pantoate--beta-alanine ligase (EC 6.3.2.1)	1	0	0	0
Para-aminobenzoate synthase, aminase component (EC 2.6.1.85)	1	1	0	0
partition protein	1	1	0	0
PAS	1	0	0	0
Peptidase, M23/M37 family	1	0	0	0
Peptide chain release factor 2; programmed frameshift-containing	1	1	0	0
Peptide methionine sulfoxide reductase MsrA (EC 1.8.4.11)	1	1	0	0
Peptidyl-prolyl cis-trans isomerase ppiB (EC 5.2.1.8)	1	1	0	0
Peptidyl-prolyl cis-trans isomerase PpiC (EC 5.2.1.8)	1	1	0	0
Periplasmic serine proteases (ClpP class)	1	0	0	0
Phenylalanyl-tRNA synthetase beta chain (EC 6.1.1.20)	1	1	0	0
Phosphate regulon transcriptional regulatory protein PhoB (SphR)	1	0	0	0
Phosphate starvation-inducible ATPase PhoH with RNA binding motif	1	0	0	0
Phosphate transport ATP-binding protein PstB (TC 3.A.1.7.1)	1	0	0	0
Phosphate:acyl-ACP acyltransferase PlsX	1	0	0	0
Phosphoadenylyl-sulfate reductase [thioredoxin] (EC 1.8.4.8) / Adenylyl-sulfate reductase [thioredoxin] (EC 1.8.4.10)	1	2	0	0
Phosphocarrier protein, nitrogen regulation associated	1	0	0	0
Phosphoenolpyruvate carboxykinase [ATP] (EC 4.1.1.49)	1	0	0	0
Phosphoenolpyruvate carboxylase (EC 4.1.1.31)	1	1	0	0
Phosphogluconate repressor HexR, RpiR family	1	1	0	0
phospholipase/carboxylesterase family protein	1	0	0	0
Phosphomethylpyrimidine kinase (EC 2.7.4.7) / Thiamin-phosphate pyrophosphorylase (EC 2.5.1.3)	1	0	0	0
Phosphoribosyl-AMP cyclohydrolase (EC 3.5.4.19)	1	1	0	0
Phosphoribosyl-ATP pyrophosphatase (EC 3.6.1.31)	1	1	0	0
Phosphoribosylanthranilate isomerase (EC 5.3.1.24)	1	1	0	0
Phosphoribosylformylglycinamidine cyclo-ligase (EC 6.3.3.1)	1	1	0	0
Phosphoribosylformylglycinamidine synthase, synthetase subunit (EC 6.3.5.3) / Phosphoribosylformylglycinamidine synthase, glutamine amidotransferase subunit (EC 6.3.5.3)	1	1	0	0
Phosphoserine phosphatase (EC 3.1.3.3)	1	1	0	0
Phytochrome, two-component sensor histidine kinase (EC 2.7.3.-)	1	0	0	0
Polyhydroxyalkanoic acid synthase	1	1	0	0
Potassium uptake protein TrkH	1	1	0	0
Predicted hydrolase	1	0	0	0
Predicted transcriptional regulator LiuR of leucine degradation pathway, MerR family	1	0	0	0
Preprotein translocase secY subunit (TC 3.A.5.1.1)	1	0	0	0
Preprotein translocase subunit SecG (TC 3.A.5.1.1)	1	1	0	0
Probable component of the lipoprotein assembly complex (forms a complex with YaeT, YfgL, and NlpB)	1	1	0	0
probable exported protein YPO3233	1	0	0	0
Probable type IV pilus assembly FimV-related transmembrane protein	1	0	0	0
Proline dehydrogenase (EC 1.5.99.8) (Proline oxidase) / Delta-1-pyrroline-5-carboxylate dehydrogenase (EC 1.5.1.12)	1	0	0	0
Propionyl-CoA carboxylase biotin-containing subunit (EC 6.4.1.3)	1	0	0	0
Protease	1	0	0	0
Protein export cytoplasm chaperone protein (SecB, maintains protein to be exported in unfolded state)	1	0	0	0
Protein involved in catabolism of external DNA	1	1	0	0
Protein of unknown function DUF81	1	0	0	0
protein of unknown function DUF885	1	0	0	0
Protein YcgL	1	0	0	0
Protein YigP (COG3165) clustered with ubiquinone biosynthetic genes	1	1	0	0
Protein-L-isoaspartate O-methyltransferase (EC 2.1.1.77)	1	0	0	0
Protein-tyrosine kinase (EC 2.7.1.112)	1	0	0	0
Proton/glutamate symport protein @ Sodium/glutamate symport protein	1	0	0	0
Putative aminotransferase, DegT family	1	0	0	0
Putative deoxyribonuclease YcfH	1	0	0	0
putative integrase	1	0	0	0
Putative subunit of Alternative cytochrome c oxidase	1	0	0	0
putative transformylase	1	0	0	0
Putative transporting ATPase	1	1	0	0
Pyridoxamine 5'-phosphate oxidase (EC 1.4.3.5)	1	0	0	0
Pyrroline-5-carboxylate reductase (EC 1.5.1.2)	1	1	0	0
Pyruvate dehydrogenase E1 component (EC 1.2.4.1)	1	1	0	0
Queuosine Biosynthesis QueE Radical SAM	1	0	0	0
Radical SAM family enzyme, similar to coproporphyrinogen III oxidase, oxygen-independent, clustered with nucleoside-triphosphatase RdgB	1	1	0	0
Recombination protein RecR	1	0	0	0
regulator of length of O-antigen component of lipopolysaccharide chains	1	0	0	0
response regulator receiver sensor signal transduction histidine kinase	1	0	0	0
Rhodanese-like domain protein	1	0	0	0
Riboflavin synthase eubacterial/eukaryotic (EC 2.5.1.9)	1	2	0	0
Ribokinase (EC 2.7.1.15)	1	1	0	0
Ribonuclease P protein component (EC 3.1.26.5)	1	1	0	0
Ribonuclease T (EC 3.1.13.-)	1	0	0	0
Ribonucleotide reductase of class Ia (aerobic), alpha subunit (EC 1.17.4.1)	1	0	0	0
Ribosomal RNA small subunit methyltransferase C (EC 2.1.1.52)	1	0	0	0
Ribosomal RNA small subunit methyltransferase E (EC 2.1.1.-)	1	1	0	0
Ribosomal small subunit pseudouridine synthase A (EC 4.2.1.70)	1	1	0	0
Ribosomal-protein-S18p-alanine acetyltransferase (EC 2.3.1.-)	1	0	0	0
Ribosome-binding factor A	1	1	0	0
RNA polymerase sigma factor RpoD	1	1	0	0
RNA polymerase sigma factor RpoE	1	1	0	0
Rod shape-determining protein MreB	1	0	0	0
Rod shape-determining protein MreC	1	0	0	0
Rod shape-determining protein MreD	1	0	0	0
Rod shape-determining protein RodA	1	1	0	0
rRNA small subunit methyltransferase I	1	1	0	0
rRNA small subunit methyltransferase, glucose inhibited division protein GidB	1	0	0	0
Rubredoxin	1	0	0	0
S-adenosylhomocysteine deaminase (EC 3.5.4.28); Methylthioadenosine deaminase	1	1	0	0
SAM-dependent methyltransferase SCO3452 (UbiE paralog)	1	0	0	0
Selenoprotein O and cysteine-containing homologs	1	0	0	0
Sensor histidine kinase PrrB (RegB) (EC 2.7.3.-)	1	0	0	0
Serine phosphatase RsbU, regulator of sigma subunit / Serine-protein kinase RsbW (EC 2.7.11.1)	1	0	0	0
Shikimate kinase I (EC 2.7.1.71)	1	1	0	0
Sigma-54 dependent DNA-binding response regulator	1	0	0	0
Sigma-54 dependent transcriptional regulator	1	0	0	0
Similar to phosphoglycolate phosphatase, clustered with ribosomal large subunit pseudouridine synthase C	1	0	0	0
Similar to phosphoglycolate phosphatase, clustered with ubiquinone biosynthesis SAM-dependent O-methyltransferase	1	1	0	0
Siroheme synthase / Precorrin-2 oxidase (EC 1.3.1.76) / Sirohydrochlorin ferrochelatase (EC 4.99.1.4) / Uroporphyrinogen-III methyltransferase (EC 2.1.1.107)	1	0	0	0
Sodium-dependent phosphate transporter	1	0	0	0
Sodium/alanine symporter	1	0	0	0
Soluble lytic murein transglycosylase precursor (EC 3.2.1.-)	1	1	0	0
Soluble pyridine nucleotide transhydrogenase (EC 1.6.1.1)	1	0	0	0
Spermidine synthase-like protein	1	0	0	0
SSU ribosomal protein S10p (S20e)	1	0	0	0
SSU ribosomal protein S11p (S14e)	1	0	0	0
SSU ribosomal protein S13p (S18e)	1	0	0	0
SSU ribosomal protein S14p (S29e) @ SSU ribosomal protein S14p (S29e), zinc-independent	1	0	0	0
SSU ribosomal protein S17p (S11e)	1	0	0	0
SSU ribosomal protein S18p @ SSU ribosomal protein S18p, zinc-independent	1	1	0	0
SSU ribosomal protein S21p	1	0	0	0
SSU ribosomal protein S3p (S3e)	1	0	0	0
SSU ribosomal protein S4p (S9e)	1	0	0	0
SSU ribosomal protein S5p (S2e)	1	0	0	0
SSU ribosomal protein S6p	1	0	0	0
SSU ribosomal protein S8p (S15Ae)	1	0	0	0
Succinate dehydrogenase flavoprotein subunit (EC 1.3.99.1)	1	1	0	0
Succinyl-CoA ligase [ADP-forming] beta chain (EC 6.2.1.5)	1	1	0	0
Succinyl-CoA:3-ketoacid-coenzyme A transferase subunit B (EC 2.8.3.5)	1	0	0	0
Sulfate permease	1	1	0	0
Sulfur acceptor protein SufE for iron-sulfur cluster assembly	1	1	0	0
Superfamily II DNA and RNA helicases	1	0	0	0
Superoxide dismutase [Fe] (EC 1.15.1.1)	1	1	0	0
Tellurite resistance protein-related protein	1	0	0	0
Tetraacyldisaccharide 4'-kinase (EC 2.7.1.130)	1	0	0	0
Thiol-disulfide isomerase and thioredoxins	1	0	0	0
Thiopurine S-methyltransferase (EC 2.1.1.67)	1	1	0	0
Thiosulfate sulfurtransferase, rhodanese (EC 2.8.1.1)	1	1	0	0
Threonyl-tRNA synthetase (EC 6.1.1.3)	1	1	0	0
Tol biopolymer transport system, TolR protein	1	0	0	0
TolA protein	1	0	0	0
tolB protein precursor, periplasmic protein involved in the tonb-independent uptake of group A colicins	1	0	0	0
Transamidase GatB domain protein	1	0	0	0
Transcription accessory protein (S1 RNA-binding domain)	1	0	0	0
Transcription elongation factor	1	0	0	0
Transcription termination protein NusA	1	2	0	0
Transcription-repair coupling factor	1	0	0	0
Transcriptional regulator SlmA, TetR family	1	2	0	0
Transcriptional regulator, ArsR family	1	2	0	0
Transcriptional regulator, ArsR family / Methyltransferase fusion	1	0	0	0
Transcriptional regulator, AsnC family	1	1	0	0
Transcriptional regulator, TetR family	1	3	0	0
Transglutaminase-like domain	1	0	0	0
Translation elongation factor P Lys34:lysine transferase	1	1	0	0
Translation elongation factor P-related protein	1	1	0	0
Translation elongation factor Ts	1	0	0	0
Translation initiation factor 3	1	1	0	0
TRAP dicarboxylate transporter, DctQ subunit, unknown substrate 6	1	0	0	0
TRAP transporter solute receptor, unknown substrate 6	1	0	0	0
Triosephosphate isomerase (EC 5.3.1.1)	1	1	0	0
tRNA (5-methylaminomethyl-2-thiouridylate)-methyltransferase (EC 2.1.1.61) / FAD-dependent cmnm(5)s(2)U34 oxidoreductase	1	2	0	0
tRNA (cytosine34-2'-O-)-methyltransferase (EC 2.1.1.-)	1	0	0	0
tRNA pseudouridine 13 synthase (EC 4.2.1.-)	1	0	0	0
tRNA pseudouridine synthase A (EC 4.2.1.70)	1	1	0	0
tRNA pseudouridine synthase C (EC 4.2.1.70)	1	0	0	0
tRNA-(ms[2]io[6]A)-hydroxylase (EC 1.-.-.-)	1	0	0	0
tRNA:Cm32/Um32 methyltransferase	1	1	0	0
Trp repressor-binding protein	1	1	0	0
Tryptophanyl-tRNA synthetase (EC 6.1.1.2)	1	2	0	0
TVG1490552 protein	1	0	0	0
Twin-arginine translocation protein TatC	1	1	0	0
Two-component response regulator	1	2	0	0
Two-component sensor CbrA: intrcellular carbon:nitrogen balance	1	0	0	0
type IV pilus biogenesis protein PilJ	1	1	0	0
Type IV pilus biogenesis protein PilZ	1	0	0	0
Tyrosyl-tRNA synthetase (EC 6.1.1.1)	1	0	0	0
ubiquinol cytochrome C oxidoreductase, cytochrome C1 subunit	1	0	0	0
Ubiquinol--cytochrome c reductase, cytochrome B subunit (EC 1.10.2.2)	1	0	0	0
Ubiquinol-cytochrome C reductase iron-sulfur subunit (EC 1.10.2.2)	1	0	0	0
Ubiquinone biosynthesis monooxygenase UbiB	1	1	0	0
Ubiquinone/menaquinone biosynthesis methyltransferase UbiE (EC 2.1.1.-)	1	0	0	0
UDP-2,3-diacylglucosamine hydrolase (EC 3.6.1.-)	1	1	0	0
UDP-N-acetylglucosamine 1-carboxyvinyltransferase (EC 2.5.1.7)	1	0	0	0
UDP-N-acetylmuramate:L-alanyl-gamma-D-glutamyl-meso-diaminopimelate ligase (EC 6.3.2.-)	1	1	0	0
UDP-N-acetylmuramoylalanine--D-glutamate ligase (EC 6.3.2.9)	1	1	0	0
UDP-N-acetylmuramoylalanyl-D-glutamate--2,6-diaminopimelate ligase (EC 6.3.2.13)	1	1	0	0
Uncharacterized ABC transporter, periplasmic component YrbD	1	0	0	0
Uncharacterized ABC transporter, permease component YrbE	1	0	0	0
Uncharacterized protein AF_0817 precursor	1	0	0	0
Uncharacterized protein with LysM domain, COG1652	1	1	0	0
Uncharacterized protein YjaG	1	0	0	0
Uncharacterized protein YrbB	1	0	0	0
Unnamed hypothetical gene product in the file!!	1	0	0	0
UPF0225 protein YchJ	1	0	0	0
UPF0234 protein YajQ	1	0	0	0
UPF0246 protein YaaA	1	0	0	0
Uracil-DNA glycosylase, family 1	1	1	0	0
Valyl-tRNA synthetase (EC 6.1.1.9)	1	1	0	0
Xaa-Pro aminopeptidase (EC 3.4.11.9)	1	0	0	0
YaeQ protein	1	0	0	0
YcgN (Fragment)	1	0	0	0
YciO family	1	0	0	0
YefM protein (antitoxin to YoeB)	1	0	0	0
YihE protein, required for LPS synthesis	1	0	0	0
YoeB toxin protein	1	0	0	0
ADP-ribose 1"-phosphate phophatase related protein	0	0	3	0
CRISPR-associated protein Cas1	0	0	2	0
DNA stabilization, phage-associated	0	0	2	0
FIG00638839: hypothetical protein	0	0	2	0
Glycosyl transferase, group 2 family protein	0	0	2	0
Probable lipoprotein	0	0	2	0
4-hydroxy-2-oxoglutarate aldolase (EC 4.1.3.16) @ 2-dehydro-3-deoxyphosphogluconate aldolase (EC 4.1.2.14)	0	1	1	0
6-phosphogluconolactonase (EC 3.1.1.31), eukaryotic type	0	0	1	0
Aldehyde dehydrogenase (EC 1.2.1.3)	0	0	1	0
Alkaline phosphatase (EC 3.1.3.1)	0	0	1	0
Alternative cytochrome c oxidase polypeptide CoxM (EC 1.9.3.1)	0	0	1	0
Alternative cytochrome c oxidase polypeptide CoxN (EC 1.9.3.1)	0	0	1	0
Alternative cytochrome c oxidase polypeptide CoxO (EC 1.9.3.1)	0	0	1	0
Bacillolysin (Neutral protease) (EC 3.4.24.28)	0	0	1	0
Bifunctional protein: zinc-containing alcohol dehydrogenase; quinone oxidoreductase ( NADPH:quinone reductase) (EC 1.1.1.-); Similar to arginate lyase	0	0	1	0
cAMP-binding proteins - catabolite gene activator and regulatory subunit of cAMP-dependent protein kinases	0	2	1	0
Capsular polysaccharide export system protein KpsC	0	0	1	0
COG1355, Predicted dioxygenase	0	0	1	0
CRISPR-associated helicase Cas3, protein	0	0	1	0
CRISPR-associated protein Cas2	0	0	1	0
CRISPR-associated protein, Cas2	0	0	1	0
CRISPR-associated protein, Cas5e family	0	0	1	0
CRISPR-associated protein, Cse3 family	0	0	1	0
CRISPR-associated protein, Cse4 family	0	0	1	0
CRISPR-associated protein, Csn1 family	0	0	1	0
CRISPR-associated protein, Csy1 family	0	0	1	0
Cytidylate kinase (EC 2.7.4.14)	0	1	1	0
Desferrioxamine E biosynthesis protein DesD @ Siderophore synthetase superfamily, group C @ Siderophore synthetase component, ligase	0	0	1	0
DinB family protein	0	0	1	0
DNA recombination-dependent growth factor C	0	0	1	0
Fibronectin type III domain protein	0	0	1	0
FIG002343: hypothetical protein	0	1	1	0
FIG00597186: hypothetical protein	0	0	1	0
FIG00643938: hypothetical protein	0	0	1	0
FIG022979: MoxR-like ATPases	0	1	1	0
gene 66 protein	0	0	1	0
Glucose-6-phosphate isomerase (EC 5.3.1.9)	0	0	1	0
Glutamate--UDP-2-acetamido-2-deoxy-D-ribohex-3-uluronic acid aminotransferase (PLP cofactor)	0	0	1	0
glutamine synthetase family protein	0	0	1	0
Hemagglutinin 2	0	0	1	0
Iron-regulated protein frpC	0	0	1	0
L-2-hydroxyglutarate oxidase (EC 1.1.3.15)	0	0	1	0
Nicotinate-nucleotide--dimethylbenzimidazole phosphoribosyltransferase (EC 2.4.2.21)	0	1	1	0
Nucleoid-associated protein NdpA	0	1	1	0
Omega-amino acid--pyruvate aminotransferase (EC 2.6.1.18)	0	0	1	0
Phage essential recombination function protein, Erf	0	0	1	0
Phage repressor protein C2	0	0	1	0
poly (3-hydroxybutyrate) depolymerase	0	0	1	0
Polysaccharide deacetylase	0	0	1	0
Possible multi-domain protein	0	0	1	0
probable glycosyl transferase	0	0	1	0
Putative deoxyribonuclease YjjV	0	1	1	0
Putative DNA-binding protein in cluster with Type I restriction-modification system	0	0	1	0
putative formyl transferase	0	0	1	0
Putative heat shock protein YegD	0	0	1	0
putative orphan protein	0	0	1	0
putative phage-related membrane protein	0	0	1	0
putative phage-related protein	0	0	1	0
putative replication protein	0	0	1	0
RelB/StbD replicon stabilization protein (antitoxin to RelE/StbE)	0	0	1	0
Segregation and condensation protein A	0	1	1	0
Serine hydroxymethyltransferase (EC 2.1.2.1) / H4MPt-dependent SHMT	0	0	1	0
Site-specific recombinase, phage integrase family	0	0	1	0
Transposase	0	0	1	0
tRNA 2-thiouridine synthesizing protein E (EC 2.8.1.-)	0	0	1	0
Tryptophan synthase alpha chain (EC 4.2.1.20)	0	1	1	0
two-component system regulatory protein	0	0	1	0
UDP-2-acetamido-2-deoxy-D-glucuronic acid dehydrogenase (NAD+ cofactor)	0	0	1	0
Xanthosine/inosine triphosphate pyrophosphatase	0	0	1	0
1-acyl-sn-glycerol-3-phosphate acyltransferase (EC 2.3.1.51)	0	1	0	0
1-deoxy-D-xylulose 5-phosphate synthase (EC 2.2.1.7)	0	1	0	0
16S rRNA (cytosine(967)-C(5))-methyltransferase (EC 2.1.1.176) ## SSU rRNA m5C967	0	1	0	0
2-haloalkanoic acid dehalogenase (EC 3.8.1.2)	0	1	0	0
2-methylaconitate isomerase	0	1	0	0
2-methylcitrate dehydratase FeS dependent (EC 4.2.1.79)	0	1	0	0
2-methylcitrate synthase (EC 2.3.3.5)	0	1	0	0
2-Oxobutyrate oxidase, putative	0	1	0	0
2-oxoglutarate dehydrogenase E1 component (EC 1.2.4.2)	0	1	0	0
2,4-dienoyl-CoA reductase [NADPH] (EC 1.3.1.34)	0	2	0	0
3-dehydroquinate dehydratase II (EC 4.2.1.10)	0	1	0	0
3-dehydroquinate synthase (EC 4.2.3.4)	0	1	0	0
3-deoxy-D-manno-octulosonate 8-phosphate phosphatase (EC 3.1.3.45)	0	1	0	0
3-isopropylmalate dehydratase small subunit (EC 4.2.1.33)	0	1	0	0
3-oxoacyl-[acyl-carrier-protein] synthase, KASII (EC 2.3.1.41)	0	1	0	0
3-phytase precursor (EC 3.1.3.8)	0	1	0	0
3-polyprenyl-4-hydroxybenzoate carboxy-lyase UbiX (EC 4.1.1.-)	0	1	0	0
3,4-dihydroxy-2-butanone 4-phosphate synthase (EC 4.1.99.12) / GTP cyclohydrolase II (EC 3.5.4.25)	0	1	0	0
3'-5' exonuclease domain protein	0	1	0	0
3'-to-5' exoribonuclease RNase R	0	3	0	0
3'-to-5' oligoribonuclease (orn)	0	1	0	0
4-hydroxybenzoyl-CoA thioesterase family active site	0	1	0	0
4'-phosphopantetheinyl transferase (EC 2.7.8.-)	0	1	0	0
4Fe-4S ferredoxin, iron-sulfur binding	0	2	0	0
5-Enolpyruvylshikimate-3-phosphate synthase (EC 2.5.1.19)	0	1	0	0
5-methyltetrahydropteroyltriglutamate--homocysteine methyltransferase (EC 2.1.1.14)	0	1	0	0
5-oxoprolinase (EC 3.5.2.9)	0	1	0	0
5'-methylthioadenosine phosphorylase (EC 2.4.2.28)	0	1	0	0
50S ribosomal subunit maturation GTPase RbgA (B. subtilis YlqF)	0	1	0	0
5S RNA	0	1	0	0
6,7-dimethyl-8-ribityllumazine synthase (EC 2.5.1.78)	0	1	0	0
ABC transporter (iron.B12.siderophore.hemin) , ATP-binding component	0	1	0	0
ABC transporter ATP-binding protein uup	0	1	0	0
ABC transporter involved in cytochrome c biogenesis, ATPase component CcmA	0	1	0	0
ABC transporter involved in cytochrome c biogenesis, CcmB subunit	0	1	0	0
ABC transporter, sugar-binding protein of unknown specificity	0	1	0	0
ABC-type Fe3+-hydroxamate transport system, periplasmic component	0	1	0	0
ABC-type hemin transport system, ATPase component	0	1	0	0
ABC-type phosphate transport system, periplasmic component	0	1	0	0
Acetate kinase (EC 2.7.2.1)	0	1	0	0
Acetate permease ActP (cation/acetate symporter)	0	1	0	0
Acetoin utilization protein	0	1	0	0
Acetolactate synthase large subunit (EC 2.2.1.6)	0	1	0	0
Acetolactate synthase small subunit (EC 2.2.1.6)	0	1	0	0
Acetyl-coenzyme A synthetase (EC 6.2.1.1)	0	1	0	0
Acetylornithine deacetylase (EC 3.5.1.16)	0	1	0	0
Acetyltransferase, GNAT family (EC 2.3.1.-)	0	1	0	0
Aconitate hydratase (EC 4.2.1.3)	0	1	0	0
Acyl dehydratase	0	1	0	0
Acyl-CoA dehydrogenase (EC 1.3.99.3)	0	1	0	0
Acyl-CoA dehydrogenase, short-chain specific (EC 1.3.8.1)	0	1	0	0
Acyl-CoA hydrolase (EC 3.1.2.20)	0	1	0	0
Acyltransferase family protein	0	1	0	0
Adenosine (5')-pentaphospho-(5'')-adenosine pyrophosphohydrolase (EC 3.6.1.-)	0	1	0	0
Adenosylcobinamide-phosphate synthase	0	1	0	0
Adenylate kinase (EC 2.7.4.3)	0	1	0	0
Adenylosuccinate lyase (EC 4.3.2.2)	0	1	0	0
Adenylosuccinate synthetase (EC 6.3.4.4)	0	1	0	0
ADP-L-glycero-D-manno-heptose-6-epimerase (EC 5.1.3.20)	0	1	0	0
Aerobic glycerol-3-phosphate dehydrogenase (EC 1.1.5.3)	0	1	0	0
Agmatine deiminase (EC 3.5.3.12)	0	1	0	0
Alanine dehydrogenase (EC 1.4.1.1)	0	1	0	0
Alanine racemase (EC 5.1.1.1)	0	1	0	0
Alcohol dehydrogenase (EC 1.1.1.1)	0	3	0	0
Aldehyde dehydrogenase (EC 1.2.1.3); Probable coniferyl aldehyde dehydrogenase (EC 1.2.1.68)	0	1	0	0
Alginate biosynthesis regulatory protein AlgR	0	1	0	0
Alkylated DNA repair protein	0	1	0	0
Alkylphosphonate utilization operon protein PhnA	0	1	0	0
Allophanate hydrolase (EC 3.5.1.54)	0	1	0	0
alpha/beta hydrolase	0	1	0	0
Alpha/beta hydrolase fold (EC 3.8.1.5)	0	3	0	0
Amidophosphoribosyltransferase (EC 2.4.2.14)	0	1	0	0
amino acid adenylation domain	0	1	0	0
Aminobenzoyl-glutamate transport protein	0	1	0	0
Ammonium transporter	0	3	0	0
AmpG permease	0	2	0	0
Anthrachelin biosynthesis protein AsbA @ Siderophore synthetase superfamily, group A @ Siderophore synthetase large component, acetyltransferase	0	1	0	0
Anthrachelin biosynthesis protein AsbB @ Siderophore synthetase superfamily, group C @ Siderophore synthetase component, ligase	0	1	0	0
Anti-sigma F factor antagonist (spoIIAA-2); Anti-sigma B factor antagonist RsbV	0	1	0	0
Arylesterase precursor (EC 3.1.1.2)	0	1	0	0
Aspartate racemase (EC 5.1.1.13)	0	1	0	0
Aspartate-semialdehyde dehydrogenase (EC 1.2.1.11)	0	1	0	0
Aspartokinase (EC 2.7.2.4) associated with ectoine biosynthesis	0	1	0	0
ATP-dependent DNA helicase UvrD/PcrA	0	2	0	0
ATP-dependent helicase	0	1	0	0
ATP-dependent helicase HrpA	0	1	0	0
ATP-dependent helicase HrpB	0	2	0	0
ATP-dependent RNA helicase DbpA	0	1	0	0
ATP-dependent RNA helicase RhlB	0	1	0	0
ATP-dependent RNA helicase RhlE	0	1	0	0
ATPase (PilT family)	0	1	0	0
ATPase, AFG1 family	0	1	0	0
Autolysin sensor kinase (EC 2.7.3.-)	0	1	0	0
Autolysis response regulater LytR	0	1	0	0
Bacteriophage (PhiC31) resistance gene pglZ	0	1	0	0
BatD	0	1	0	0
BAX protein	0	1	0	0
Beta-lactamase	0	1	0	0
Beta-lactamase class C and other penicillin binding proteins	0	1	0	0
Biotin operon repressor / Biotin-protein ligase (EC 6.3.4.15)	0	1	0	0
Biotin synthesis protein BioH	0	1	0	0
Bll4347 protein	0	1	0	0
Branched-chain amino acid ABC-type transport system, permease components	0	1	0	0
Branched-chain amino acid aminotransferase (EC 2.6.1.42)	0	1	0	0
Bsu YqfO NIF3/CutA domain	0	1	0	0
C-factor, putative	0	1	0	0
C4-dicarboxylate transporter large subunit	0	1	0	0
Capsular polysaccharide synthesis enzyme CpsB	0	1	0	0
Carbon-nitrogen hydrolase	0	1	0	0
Carbonic anhydrase (EC 4.2.1.1)	0	1	0	0
carbonic anhydrase, family 3	0	1	0	0
Carboxyl esterase, a/b hydrolase	0	1	0	0
carboxylesterase (lipT)	0	1	0	0
Carboxynorspermidine decarboxylase, putative (EC 4.1.1.-)	0	1	0	0
Carboxynorspermidine dehydrogenase, putative (EC 1.1.1.-)	0	2	0	0
Catalase (EC 1.11.1.6)	0	1	0	0
Cell division protein FtsK	0	1	0	0
Cell division protein FtsQ	0	1	0	0
Cell division protein MraZ	0	1	0	0
Cell division protein ZipA	0	1	0	0
Chaperone protein DnaJ	0	1	0	0
Chaperone protein DnaK	0	1	0	0
Chaperone protein HtpG	0	1	0	0
Chemotaxis protein cheA (EC 2.7.3.-)	0	1	0	0
Chemotaxis protein CheD	0	1	0	0
Chemotaxis protein CheX	0	1	0	0
Chemotaxis response - phosphatase CheZ	0	1	0	0
Chorismate mutase I (EC 5.4.99.5) / Prephenate dehydratase (EC 4.2.1.51)	0	1	0	0
Chorismate synthase (EC 4.2.3.5)	0	1	0	0
Chromosomal replication initiator protein DnaA	0	1	0	0
Citrate synthase (si) (EC 2.3.3.1)	0	1	0	0
ClpB protein	0	1	0	0
Cobalt-zinc-cadmium resistance protein	0	1	0	0
COG0779: clustered with transcription termination protein NusA	0	1	0	0
COG1132	0	1	0	0
COG2363	0	1	0	0
COG3332	0	1	0	0
COGs COG2929	0	1	0	0
COGs COG3146	0	1	0	0
Colanic acid biosysnthesis glycosyl transferase WcaI	0	1	0	0
Cold shock protein CspC	0	1	0	0
Cold-shock DEAD-box protein A	0	1	0	0
Collagenase and related proteases	0	2	0	0
Conserved hypothetical protein 2001	0	1	0	0
CopG protein	0	1	0	0
Copper resistance protein B	0	1	0	0
Copper sensory histidine kinase CpxA	0	1	0	0
Coproporphyrinogen III oxidase, aerobic (EC 1.3.3.3)	0	1	0	0
Crossover junction endodeoxyribonuclease RuvC (EC 3.1.22.4)	0	1	0	0
Cys-tRNA(Pro) deacylase YbaK	0	1	0	0
Cysteine synthase B (EC 2.5.1.47)	0	1	0	0
Cysteinyl-tRNA synthetase (EC 6.1.1.16)	0	1	0	0
Cytochrome c heme lyase subunit CcmF	0	1	0	0
Cytochrome c heme lyase subunit CcmH	0	1	0	0
Cytochrome c heme lyase subunit CcmL	0	1	0	0
Cytochrome c oxidase subunit CcoN (EC 1.9.3.1)	0	1	0	0
Cytochrome c oxidase subunit CcoO (EC 1.9.3.1)	0	1	0	0
Cytochrome c oxidase subunit CcoQ (EC 1.9.3.1)	0	1	0	0
Cytochrome c-type biogenesis protein CcmG/DsbE, thiol:disulfide oxidoreductase	0	1	0	0
Cytochrome c5	0	1	0	0
Cytochrome d ubiquinol oxidase subunit I (EC 1.10.3.-)	0	1	0	0
Cytochrome d ubiquinol oxidase subunit II (EC 1.10.3.-)	0	1	0	0
D-alanine--D-alanine ligase (EC 6.3.2.4)	0	1	0	0
D-erythrose-4-phosphate dehydrogenase (EC 1.2.1.72)	0	1	0	0
Death on curing protein, Doc toxin	0	1	0	0
DedD protein	0	1	0	0
Delta-1-pyrroline-5-carboxylate dehydrogenase (EC 1.5.1.12)	0	1	0	0
Deoxycytidine triphosphate deaminase (EC 3.5.4.13)	0	1	0	0
Deoxyguanosinetriphosphate triphosphohydrolase (EC 3.1.5.1)	0	1	0	0
Dephospho-CoA kinase (EC 2.7.1.24)	0	1	0	0
Di-and tricarboxylate transporter	0	1	0	0
Diadenosine tetraphosphate (Ap4A) hydrolase and other HIT family hydrolases	0	1	0	0
Diaminobutyrate-pyruvate aminotransferase (EC 2.6.1.46) # EctB	0	1	0	0
Diaminohydroxyphosphoribosylaminopyrimidine deaminase (EC 3.5.4.26) / 5-amino-6-(5-phosphoribosylamino)uracil reductase (EC 1.1.1.193)	0	1	0	0
Diaminopimelate decarboxylase (EC 4.1.1.20)	0	1	0	0
Diaminopimelate epimerase (EC 5.1.1.7)	0	1	0	0
Dihydrodipicolinate reductase (EC 1.3.1.26)	0	1	0	0
Dihydrofolate reductase (EC 1.5.1.3)	0	1	0	0
Dihydrofolate synthase (EC 6.3.2.12) / Folylpolyglutamate synthase (EC 6.3.2.17)	0	1	0	0
Dihydrolipoamide acetyltransferase component of pyruvate dehydrogenase complex (EC 2.3.1.12)	0	1	0	0
Dihydrolipoamide succinyltransferase component (E2) of 2-oxoglutarate dehydrogenase complex (EC 2.3.1.61)	0	1	0	0
Dihydroorotate dehydrogenase (EC 1.3.3.1)	0	1	0	0
Dioxygenases related to 2-nitropropane dioxygenase	0	1	0	0
DNA gyrase subunit A (EC 5.99.1.3)	0	1	0	0
DNA gyrase subunit B (EC 5.99.1.3)	0	1	0	0
DNA mismatch repair protein MutS	0	1	0	0
DNA polymerase III beta subunit (EC 2.7.7.7)	0	2	0	0
DNA polymerase III chi subunit (EC 2.7.7.7)	0	1	0	0
DNA polymerase III delta subunit (EC 2.7.7.7)	0	1	0	0
DNA repair protein RecN	0	1	0	0
DNA sulfur modification protein DndD	0	1	0	0
DNA sulfur modification protein DndE	0	1	0	0
DNA topoisomerase I (EC 5.99.1.2)	0	1	0	0
DNA topoisomerase III (EC 5.99.1.2)	0	1	0	0
DNA-3-methyladenine glycosylase (EC 3.2.2.20)	0	3	0	0
DNA-binding protein Fis	0	1	0	0
DNA-directed RNA polymerase beta subunit (EC 2.7.7.6)	0	1	0	0
Electron transport complex protein RnfA	0	1	0	0
Electron transport complex protein RnfC	0	1	0	0
Electron transport complex protein RnfD	0	1	0	0
Enoyl-[acyl-carrier-protein] reductase [FMN] (EC 1.3.1.9)	0	1	0	0
Enoyl-[acyl-carrier-protein] reductase [NADH] (EC 1.3.1.9)	0	1	0	0
Enoyl-CoA hydratase (EC 4.2.1.17) / Delta(3)-cis-delta(2)-trans-enoyl-CoA isomerase (EC 5.3.3.8) / 3-hydroxyacyl-CoA dehydrogenase (EC 1.1.1.35) / 3-hydroxybutyryl-CoA epimerase (EC 5.1.2.3)	0	1	0	0
Excinuclease ABC subunit A	0	2	0	0
Exodeoxyribonuclease VII large subunit (EC 3.1.11.6)	0	1	0	0
Exodeoxyribonuclease VII small subunit (EC 3.1.11.6)	0	1	0	0
extracellular protease	0	1	0	0
Fatty acid cis/trans isomerase	0	1	0	0
Fatty acid desaturase (EC 1.14.19.1); Delta-9 fatty acid desaturase (EC 1.14.19.1)	0	1	0	0
Fe-S OXIDOREDUCTASE (1.8.-.-)	0	1	0	0
Ferric siderophore transport system, biopolymer transport protein ExbB	0	2	0	0
Ferric siderophore transport system, periplasmic binding protein TonB	0	1	0	0
Ferric uptake regulation protein FUR	0	1	0	0
Ferrous iron transport protein B	0	1	0	0
FIG001196: Membrane protein YedZ	0	1	0	0
FIG001454: Transglutaminase-like enzymes, putative cysteine proteases	0	2	0	0
FIG002188: hypothetical protein	0	2	0	0
FIG002577: Putative lipoprotein precursor	0	1	0	0
FIG002781: Alpha-L-glutamate ligase family protein	0	1	0	0
FIG003276: zinc-binding protein	0	1	0	0
FIG00350868: hypothetical protein	0	1	0	0
FIG00351054: hypothetical protein	0	1	0	0
FIG003551: hypothetical protein	0	1	0	0
FIG003737: Predicted deacylase	0	2	0	0
FIG00487766: hypothetical protein	0	1	0	0
FIG005429: hypothetical protein	0	1	0	0
FIG007317: Chromosome segregation protein SMC-like	0	2	0	0
FIG00784450: hypothetical protein	0	1	0	0
FIG00921294: hypothetical protein	0	1	0	0
FIG00953296: hypothetical protein	0	1	0	0
FIG00979822: hypothetical protein	0	1	0	0
FIG01035535: hypothetical protein	0	1	0	0
FIG01058605: hypothetical protein	0	1	0	0
FIG01096413: hypothetical protein	0	1	0	0
FIG011155: Zinc carboxypeptidase-related protein	0	1	0	0
FIG014328: hypothetical protein	0	1	0	0
FIG014574: hypothetical protein	0	1	0	0
FIG023769: Choline transport related protein	0	1	0	0
FIG024746: hypothetical protein	0	1	0	0
FIG028593: membrane protein	0	2	0	0
FIG039767: hypothetical protein	0	1	0	0
FIG084569: hydrolase, alpha/beta fold family	0	1	0	0
FIG111991: hypothetical protein	0	1	0	0
FIG137478: Hypothetical protein YbgI	0	1	0	0
FIG139976: hypothetical protein	0	1	0	0
FIG146518: Zn-dependent hydrolases, including glyoxylases	0	1	0	0
FIG149030: hypothetical protein	0	1	0	0
FIG152265: Sodium:solute symporter associated protein	0	1	0	0
FIG160596: Signaling protein with membrane-bound sensor domain and GGDEF domain	0	1	0	0
FKBP-type peptidyl-prolyl cis-trans isomerase SlyD (EC 5.2.1.8)	0	1	0	0
Flagellar assembly protein FliH	0	1	0	0
Flagellar basal-body rod protein FlgB	0	1	0	0
Flagellar biosynthesis protein FlhF	0	1	0	0
Flagellar biosynthesis protein FliL	0	1	0	0
Flagellar hook-associated protein FliD	0	1	0	0
Flagellar motor switch protein FliM	0	1	0	0
Flagellar protein FliJ	0	1	0	0
Flagellar regulatory protein FleQ	0	2	0	0
Flagellar sensor histidine kinase FleS	0	1	0	0
Flagellar synthesis regulator FleN	0	1	0	0
Flagellin protein FlaA	0	1	0	0
Formamidase (EC 3.5.1.49)	0	1	0	0
Formamidopyrimidine-DNA glycosylase (EC 3.2.2.23)	0	1	0	0
Fructose-1,6-bisphosphatase, type I (EC 3.1.3.11)	0	1	0	0
Fructose-bisphosphate aldolase class II (EC 4.1.2.13)	0	1	0	0
Fumarate hydratase class I, aerobic (EC 4.2.1.2)	0	1	0	0
Fumarate hydratase class II (EC 4.2.1.2)	0	1	0	0
Fumarylacetoacetate hydrolase family protein	0	1	0	0
FxsA protein	0	1	0	0
Gamma-glutamyl phosphate reductase (EC 1.2.1.41)	0	1	0	0
GENE II AND X PROTEINS	0	1	0	0
General secretion pathway protein C	0	1	0	0
GGDEF and EAL domain proteins	0	1	0	0
GGDEF domain protein	0	1	0	0
GlpG protein (membrane protein of glp regulon)	0	1	0	0
Glutamate N-acetyltransferase (EC 2.3.1.35) / N-acetylglutamate synthase (EC 2.3.1.1)	0	1	0	0
Glutamate synthase [NADPH] small chain (EC 1.4.1.13)	0	1	0	0
Glutamine amidotransferase, class I	0	2	0	0
Glutamine synthetase type III, GlnN (EC 6.3.1.2)	0	1	0	0
Glutaminyl-tRNA synthetase (EC 6.1.1.18)	0	1	0	0
Glutamyl-tRNA reductase (EC 1.2.1.70)	0	1	0	0
Glutaredoxin-related protein	0	1	0	0
Glutathione peroxidase (EC 1.11.1.9)	0	1	0	0
Glutathione S-transferase	0	1	0	0
Glutathione S-transferase family protein	0	1	0	0
Glutathione synthetase (EC 6.3.2.3)	0	1	0	0
Glutathione-regulated potassium-efflux system ancillary protein KefG	0	1	0	0
Glutathione-regulated potassium-efflux system protein KefC	0	1	0	0
Glycerophosphoryl diester phosphodiesterase (EC 3.1.4.46)	0	1	0	0
Glycine oxidase ThiO (EC 1.4.3.19)	0	1	0	0
GMP synthase [glutamine-hydrolyzing] (EC 6.3.5.2)	0	1	0	0
GNAT family acetyltransferase VC2332	0	1	0	0
GNAT family N-acetyltransferase	0	1	0	0
GTP cyclohydrolase I (EC 3.5.4.16) type 1	0	1	0	0
GTP pyrophosphokinase (EC 2.7.6.5), (p)ppGpp synthetase I	0	1	0	0
GTP-binding protein EngA	0	1	0	0
GTP-binding protein Obg	0	3	0	0
Heat shock protein 60 family chaperone GroEL	0	2	0	0
Heat shock protein 60 family co-chaperone GroES	0	1	0	0
Heat shock protein GrpE	0	1	0	0
Helicase PriA essential for oriC/DnaA-independent DNA replication	0	1	0	0
Helix-turn-helix protein, CopG family	0	1	0	0
Hemin ABC transporter, permease protein	0	1	0	0
Hemin transport protein HmuS	0	1	0	0
Hemoglobin-like protein HbO	0	1	0	0
High-affinity choline uptake protein BetT	0	2	0	0
Histidine triad (HIT) nucleotide-binding protein, cyanobacterial subgroup	0	1	0	0
histone deacetylase family protein	0	1	0	0
Histone H1-like protein HC2	0	1	0	0
Holliday junction DNA helicase RuvA	0	1	0	0
Holliday junction DNA helicase RuvB	0	1	0	0
Homolog of E. coli HemX protein	0	1	0	0
Homoserine O-acetyltransferase (EC 2.3.1.31)	0	2	0	0
Hpt domain protein	0	1	0	0
HTH-type transcriptional regulator IlvY	0	1	0	0
hydrolase, putative	0	1	0	0
Hydroxymethylpyrimidine phosphate synthase ThiC	0	1	0	0
Hypothetical metal-binding enzyme, YcbL homolog	0	1	0	0
Hypothetical protein GBAA1986 associated with anthrachelin biosynthesis, isomerase-like TIM barrel domain	0	1	0	0
hypothetical protein PA3071	0	1	0	0
hypothetical signal peptide protein	0	1	0	0
Hypothetical YciO protein, TsaC/YrdC paralog	0	1	0	0
IcmF-related protein	0	2	0	0
Inner membrane protein YihY, formerly thought to be RNase BN	0	1	0	0
Inorganic pyrophosphatase (EC 3.6.1.1)	0	1	0	0
Inosine-5'-monophosphate dehydrogenase (EC 1.1.1.205)	0	1	0	0
Inositol-1-monophosphatase (EC 3.1.3.25)	0	2	0	0
Integral membrane protein YggT, involved in response to extracytoplasmic stress (osmotic shock)	0	1	0	0
Integration host factor alpha subunit	0	1	0	0
Integron integrase IntI2	0	2	0	0
internalin, putative	0	2	0	0
Intracellular septation protein IspA	0	1	0	0
Iojap protein	0	1	0	0
Iron-regulated protein A precursor	0	1	0	0
Ketol-acid reductoisomerase (EC 1.1.1.86)	0	1	0	0
L-asparaginase (EC 3.5.1.1)	0	1	0	0
L-aspartate oxidase (EC 1.4.3.16)	0	1	0	0
L-threonine 3-O-phosphate decarboxylase (EC 4.1.1.81)	0	1	0	0
Lactoylglutathione lyase and related lyases	0	1	0	0
Large exoproteins involved in heme utilization or adhesion	0	1	0	0
Large Subunit Ribosomal RNA; lsuRNA; LSU rRNA	0	3	0	0
Late competence protein ComEA, DNA receptor	0	1	0	0
Lead, cadmium, zinc and mercury transporting ATPase (EC 3.6.3.3) (EC 3.6.3.5); Copper-translocating P-type ATPase (EC 3.6.3.4)	0	2	0	0
Leader peptidase (Prepilin peptidase) (EC 3.4.23.43) / N-methyltransferase (EC 2.1.1.-)	0	1	0	0
LemA protein	0	1	0	0
Leucyl-tRNA synthetase (EC 6.1.1.4)	0	1	0	0
Lipase	0	4	0	0
lipase modulator protein	0	1	0	0
Lipase precursor (EC 3.1.1.3)	0	2	0	0
Lipid A biosynthesis lauroyl acyltransferase (EC 2.3.1.-)	0	1	0	0
Lipopolysaccharide heptosyltransferase I (EC 2.4.1.-)	0	1	0	0
lipoprotein Blc	0	1	0	0
Long-chain-fatty-acid--CoA ligase associated with anthrachelin biosynthesis	0	1	0	0
Low molecular weight protein tyrosine phosphatase (EC 3.1.3.48)	0	1	0	0
LppC putative lipoprotein	0	1	0	0
LPS-assembly lipoprotein RlpB precursor (Rare lipoprotein B)	0	1	0	0
LSU m3Psi1915 methyltransferase RlmH	0	1	0	0
LSU m5C1962 methyltransferase RlmI	0	1	0	0
LSU ribosomal protein L10p (P0)	0	1	0	0
LSU ribosomal protein L1p (L10Ae)	0	1	0	0
LSU ribosomal protein L28p	0	1	0	0
LSU ribosomal protein L31p @ LSU ribosomal protein L31p, zinc-dependent	0	1	0	0
LSU ribosomal protein L7/L12 (P1/P2)	0	1	0	0
LSU ribosomal protein L9p	0	1	0	0
lysozyme family protein	0	1	0	0
Malate:quinone oxidoreductase (EC 1.1.5.4)	0	1	0	0
Membrane fusion protein of RND family multidrug efflux pump	0	1	0	0
Membrane protein, HPP family	0	1	0	0
Membrane proteins related to metalloendopeptidases	0	2	0	0
Membrane-bound lytic murein transglycosylase B precursor (EC 3.2.1.-)	0	1	0	0
Membrane-bound lytic murein transglycosylase D precursor (EC 3.2.1.-)	0	1	0	0
Mercuric resistance operon regulatory protein	0	1	0	0
Mesenchymal stem cell protein DSCD75	0	2	0	0
Metal transporter, ZIP family	0	1	0	0
metalloprotease, insulinase family	0	1	0	0
Methionine biosynthesis protein MetW	0	1	0	0
Methionyl-tRNA formyltransferase-like protein 2	0	1	0	0
Methylase of polypeptide chain release factors	0	1	0	0
Methylisocitrate lyase (EC 4.1.3.30)	0	1	0	0
Microcystin dependent protein	0	3	0	0
Mlr4229 protein	0	1	0	0
Mlr7403 protein	0	1	0	0
Molybdenum cofactor biosynthesis protein MoaA	0	1	0	0
Molybdopterin biosynthesis protein MoeA	0	1	0	0
Molybdopterin-guanine dinucleotide biosynthesis protein MobA	0	1	0	0
monooxygenase, flavin-binding family	0	2	0	0
MOSC domain protein	0	1	0	0
MoxR-like ATPase in aerotolerance operon	0	1	0	0
MscS Mechanosensitive ion channel	0	1	0	0
Msl2237 protein	0	1	0	0
Multicopper oxidase	0	1	0	0
Mutator mutT protein (7,8-dihydro-8-oxoguanine-triphosphatase) (EC 3.6.1.-) / Thiamin-phosphate pyrophosphorylase-like protein	0	1	0	0
MutT/nudix family protein	0	1	0	0
Mycobacteriophage Barnyard protein gp56	0	1	0	0
Myo-inositol 2-dehydrogenase	0	1	0	0
N-acetyl-L,L-diaminopimelate deacetylase (EC 3.5.1.47)	0	1	0	0
N-carbamoylputrescine amidase (3.5.1.53)	0	1	0	0
N-succinyl-L,L-diaminopimelate desuccinylase (EC 3.5.1.18)	0	1	0	0
Na(+) H(+) antiporter subunit A; Na(+) H(+) antiporter subunit B	0	1	0	0
Na(+) H(+) antiporter subunit C	0	1	0	0
Na(+) H(+) antiporter subunit D	0	1	0	0
Na(+) H(+) antiporter subunit E	0	1	0	0
Na(+) H(+) antiporter subunit F	0	1	0	0
Na(+) H(+) antiporter subunit G	0	1	0	0
Na(+)-translocating NADH-quinone reductase subunit B (EC 1.6.5.-)	0	1	0	0
Na(+)-translocating NADH-quinone reductase subunit C (EC 1.6.5.-)	0	1	0	0
Na(+)-translocating NADH-quinone reductase subunit D (EC 1.6.5.-)	0	1	0	0
Na+/H+ antiporter NhaD type	0	1	0	0
NAD kinase (EC 2.7.1.23)	0	1	0	0
NAD-dependent protein deacetylase of SIR2 family	0	1	0	0
NAD-specific glutamate dehydrogenase (EC 1.4.1.2), large form	0	1	0	0
NAD(FAD)-utilizing dehydrogenase, sll0175 homolog	0	1	0	0
NAD(FAD)-utilizing dehydrogenases	0	1	0	0
NADPH-dependent 7-cyano-7-deazaguanine reductase (EC 1.7.1.13)	0	1	0	0
Nicotinate-nucleotide adenylyltransferase (EC 2.7.7.18)	0	1	0	0
Nitric oxide -responding transcriptional regulator Dnr (Crp/Fnr family)	0	1	0	0
Nitrilotriacetate monooxygenase component B (EC 1.14.13.-)	0	1	0	0
Nitrogen regulatory protein P-II	0	1	0	0
Nitroreductase family protein	0	1	0	0
Non-specific DNA-binding protein Dps / Iron-binding ferritin-like antioxidant protein / Ferroxidase (EC 1.16.3.1)	0	1	0	0
Nucleoside 5-triphosphatase RdgB (dHAPTP, dITP, XTP-specific) (EC 3.6.1.15)	0	1	0	0
Nucleoside triphosphate pyrophosphohydrolase MazG (EC 3.6.1.8)	0	1	0	0
Nucleotidyltransferase substrate binding protein, HI0074	0	1	0	0
Nudix hydrolase family protein	0	1	0	0
O-acetylhomoserine sulfhydrylase (EC 2.5.1.49) / O-succinylhomoserine sulfhydrylase (EC 2.5.1.48)	0	1	0	0
Oligopeptide ABC transporter, periplasmic oligopeptide-binding protein OppA (TC 3.A.1.5.1)	0	1	0	0
Oligopeptide transport system permease protein	0	1	0	0
Ornithine carbamoyltransferase (EC 2.1.3.3)	0	1	0	0
Ornithine decarboxylase (EC 4.1.1.17) / Arginine decarboxylase (EC 4.1.1.19)	0	1	0	0
Outer membrane protein romA	0	1	0	0
Outer membrane protein W precursor	0	1	0	0
Oxaloacetate decarboxylase beta chain (EC 4.1.1.3)	0	1	0	0
Oxidoreductase (EC 1.1.1.-)	0	1	0	0
Oxidoreductase, short chain dehydrogenase/reductase family	0	1	0	0
Oxidoreductase, short-chain dehydrogenase/reductase family	0	1	0	0
Patatin	0	1	0	0
Penicillin-binding protein 2 (PBP-2)	0	1	0	0
PepSY-associated TM helix	0	1	0	0
Peptidase B (EC 3.4.11.23)	0	1	0	0
peptidase S45, penicillin amidase	0	1	0	0
Peptide ABC transporter, ATP-binding protein	0	1	0	0
Peptide chain release factor 1	0	1	0	0
Peptide deformylase (EC 3.5.1.88)	0	1	0	0
Periplasmic protease	0	1	0	0
Periplasmic thiol:disulfide oxidoreductase DsbB, required for DsbA reoxidation	0	1	0	0
Permease	0	1	0	0
Peroxiredoxin	0	1	0	0
Phage T7 exclusion protein	0	1	0	0
Phage T7 exclusion protein associated hypothetical protein	0	1	0	0
Phage-related protein	0	1	0	0
Phenazine biosynthesis protein PhzF like	0	1	0	0
Phosphate acetyltransferase (EC 2.3.1.8)	0	1	0	0
Phosphatidylserine decarboxylase (EC 4.1.1.65)	0	1	0	0
Phospho-N-acetylmuramoyl-pentapeptide-transferase (EC 2.7.8.13)	0	1	0	0
Phosphoglucomutase (EC 5.4.2.2)	0	1	0	0
Phosphoglycerate kinase (EC 2.7.2.3)	0	1	0	0
Phosphoglycolate phosphatase (EC 3.1.3.18)	0	1	0	0
Phosphoheptose isomerase (EC 5.3.1.-)	0	1	0	0
Phosphomannomutase (EC 5.4.2.8)	0	1	0	0
Phosphonate ABC transporter permease protein phnE (TC 3.A.1.9.1)	0	1	0	0
Phosphopantetheine adenylyltransferase (EC 2.7.7.3)	0	1	0	0
Phosphoribosylamine--glycine ligase (EC 6.3.4.13)	0	1	0	0
Phosphoribosylglycinamide formyltransferase (EC 2.1.2.2)	0	1	0	0
Phosphoribosylglycinamide formyltransferase 2 (EC 2.1.2.-)	0	1	0	0
Phosphoserine aminotransferase (EC 2.6.1.52)	0	1	0	0
PlcB, ORFX, ORFP, ORFB, ORFA, ldh gene	0	1	0	0
Pmp3 family protein	0	1	0	0
Polyribonucleotide nucleotidyltransferase (EC 2.7.7.8)	0	1	0	0
Porphobilinogen deaminase (EC 2.5.1.61)	0	1	0	0
Potassium efflux system KefA protein / Small-conductance mechanosensitive channel	0	2	0	0
PQQ-dependent oxidoreductase, gdhB family	0	1	0	0
Predicted aminoglycoside phosphotransferase	0	1	0	0
Predicted endonuclease distantly related to archaeal Holliday junction resolvase	0	1	0	0
Predicted exporter of the RND superfamily	0	1	0	0
Predicted hydrolase of the alpha/beta-hydrolase fold	0	1	0	0
Predicted permease	0	1	0	0
Predicted signal transduction protein	0	2	0	0
Predicted signal-transduction protein containing cAMP-binding and CBS domains	0	2	0	0
Predicted thioesterase	0	1	0	0
Predicted transcriptional regulator for fatty acid degradation FadQ, TetR family	0	1	0	0
Predicted transcriptional regulators	0	1	0	0
Prephenate dehydratase (EC 4.2.1.51)	0	1	0	0
Preprotein translocase subunit SecE (TC 3.A.5.1.1)	0	1	0	0
Prevent host death protein, Phd antitoxin	0	1	0	0
probable auxin-responsive-like protein	0	1	0	0
Probable carboxyvinyl-carboxyphosphonate phosphorylmutase (EC 2.7.8.23)	0	1	0	0
Probable deoR-family transcriptional regulator	0	1	0	0
probable iron-sulfur binding protein YPO1417	0	1	0	0
probable membrane protein NMA1176	0	1	0	0
Probable RND efflux membrane fusion protein	0	2	0	0
Probable sensor/response regulator hybrid (EC 2.7.3.-)	0	1	0	0
probable short-chain dehydrogenase	0	1	0	0
Probable transmembrane protein	0	2	0	0
probable transmembrane sensor	0	1	0	0
Prolipoprotein diacylglyceryl transferase (EC 2.4.99.-)	0	1	0	0
Prophage CP4-57 regulatory protein-like protein	0	1	0	0
Propionate catabolism operon transcriptional regulator of GntR family [predicted]	0	1	0	0
Protease III precursor (EC 3.4.24.55)	0	1	0	0
Protein containing plastocyanin/azurin family domain	0	1	0	0
Protein containing transglutaminase-like domain, putative cysteine protease	0	1	0	0
Protein export cytoplasm protein SecA ATPase RNA helicase (TC 3.A.5.1.1)	0	1	0	0
Protein ImpG/VasA	0	1	0	0
Protein Implicated in DNA repair function with RecA and MutS	0	1	0	0
protein of unknown function DUF1244	0	1	0	0
Protein of unknown function DUF1282	0	1	0	0
protein of unknown function DUF218	0	1	0	0
Protein of unknown function DUF484	0	1	0	0
Protein of unknown function DUF924	0	1	0	0
Protein phosphatase ImpM	0	1	0	0
Protein-N(5)-glutamine methyltransferase PrmB, methylates LSU ribosomal protein L3p	0	1	0	0
proteinase inhibitor, putative	0	1	0	0
Pterin-4-alpha-carbinolamine dehydratase (EC 4.2.1.96)	0	1	0	0
Purine nucleoside phosphorylase (EC 2.4.2.1)	0	1	0	0
putative 4-hydroxybenzoyl-CoA thioesterase	0	1	0	0
putative ATP/GTP binding protein	0	1	0	0
Putative formate dehydrogenase oxidoreductase protein	0	1	0	0
Putative glycosyl transferase	0	1	0	0
Putative Holliday junction resolvase (EC 3.1.-.-)	0	1	0	0
putative iron-regulated membrane protein	0	2	0	0
Putative mannosyl-3-phosphoglycerate phosphatase (EC 3.1.3.70)	0	1	0	0
Putative metal chaperone, involved in Zn homeostasis, GTPase of COG0523 family	0	1	0	0
putative nucleotidyl-sugar pyranose mutase	0	1	0	0
Putative OMR family iron-siderophore receptor precursor	0	1	0	0
putative outer membrane protein A	0	1	0	0
putative oxidoreductase	0	1	0	0
Putative protein-S-isoprenylcysteine methyltransferase	0	1	0	0
Putative SAM-dependent methyltransferases	0	1	0	0
Putative sulfate permease	0	1	0	0
Putative transport protein	0	1	0	0
Putative uncharacterized protein ydbL, may be related to amine metabolism	0	1	0	0
Pyridoxamine 5'-phosphate oxidase	0	1	0	0
Pyruvate carboxyl transferase subunit A (EC 6.4.1.1)	0	1	0	0
Pyruvate carboxyl transferase subunit B (EC 6.4.1.1)	0	1	0	0
Queuosine Biosynthesis QueC ATPase	0	1	0	0
Quorum-sensing regulator of virulence HapR	0	1	0	0
Rare lipoprotein A precursor	0	1	0	0
RebB protein	0	1	0	0
RecA protein	0	1	0	0
Regulatory protein RecX	0	1	0	0
regulatory protein, putative	0	1	0	0
RelE/StbE replicon stabilization toxin	0	1	0	0
Replicative DNA helicase (EC 3.6.1.-)	0	2	0	0
Response regulator containing a CheY-like receiver domain and an HD-GYP domain	0	1	0	0
Response regulator NasT	0	1	0	0
Response regulator protein	0	1	0	0
Response regulator receiver	0	1	0	0
RhiA protein	0	1	0	0
Rhodanese domain protein UPF0176	0	1	0	0
Rhs family protein	0	1	0	0
Ribonuclease E (EC 3.1.26.12)	0	1	0	0
Ribonuclease E inhibitor RraA	0	1	0	0
Ribonuclease HI (EC 3.1.26.4)	0	1	0	0
Ribonucleotide reductase transcriptional regulator NrdR	0	1	0	0
Ribosomal protein L11 methyltransferase (EC 2.1.1.-)	0	1	0	0
Ribosomal protein S6 glutaminyl transferase	0	1	0	0
ribosomal protein S6 glutaminyl transferase related protein	0	1	0	0
Ribosomal RNA large subunit methyltransferase A (EC 2.1.1.51)	0	1	0	0
Ribosomal RNA large subunit methyltransferase F (EC 2.1.1.51)	0	1	0	0
Ribosomal RNA large subunit methyltransferase N (EC 2.1.1.-)	0	1	0	0
Ribosome modulation factor	0	1	0	0
Ribosome small subunit-stimulated GTPase EngC	0	1	0	0
Ribulosamine/erythrulosamine 3-kinase potentially involved in protein deglycation	0	1	0	0
Ribulose-phosphate 3-epimerase (EC 5.1.3.1)	0	1	0	0
RNA methyltransferase, TrmA family	0	1	0	0
RNA polymerase sigma factor RpoS	0	1	0	0
RNA polymerase sigma-70 factor	0	1	0	0
Rossmann fold nucleotide-binding protein Smf possibly involved in DNA uptake	0	1	0	0
rRNA small subunit 7-methylguanosine (m7G) methyltransferase GidB	0	1	0	0
rRNA small subunit methyltransferase H	0	1	0	0
RTX toxins and related Ca2+-binding proteins	0	1	0	0
S-(hydroxymethyl)glutathione dehydrogenase (EC 1.1.1.284)	0	1	0	0
S-adenosylmethionine-dependent methyltransferase Functionally Coupled to the MukBEF Chromosome Partitioning Mechanism	0	1	0	0
S-formylglutathione hydrolase (EC 3.1.2.12)	0	1	0	0
Scaffold protein for [4Fe-4S] cluster assembly ApbC, MRP-like	0	1	0	0
SEC-C motif	0	1	0	0
Segregation and condensation protein B	0	1	0	0
Selenide,water dikinase (EC 2.7.9.3)	0	1	0	0
sensor histidine kinase	0	1	0	0
Sensor histidine kinase/response regulator	0	2	0	0
Sensory box histidine kinase	0	2	0	0
Serine phosphatase RsbU, regulator of sigma subunit	0	2	0	0
serine/threonine protein kinase	0	2	0	0
SH3 domain protein	0	1	0	0
Shikimate 5-dehydrogenase I alpha (EC 1.1.1.25)	0	1	0	0
Short-chain dehydrogenase/reductase (SDR) superfamily	0	1	0	0
Sigma factor RpoE negative regulatory protein RseA	0	1	0	0
Sigma-70 factor	0	1	0	0
Signal peptidase I (EC 3.4.21.89)	0	1	0	0
similar to amino acid transport protein (partial length)	0	1	0	0
Single-stranded-DNA-specific exonuclease RecJ (EC 3.1.-.-)	0	1	0	0
Site specific recombinase, phage integrase	0	1	0	0
Small Subunit Ribosomal RNA; ssuRNA; SSU rRNA	0	3	0	0
sodium pump decarboxylase, gamma subunit	0	1	0	0
Sodium-dependent transporter	0	1	0	0
SOS-response repressor and protease LexA (EC 3.4.21.88)	0	1	0	0
SSU ribosomal protein S12p (S23e)	0	1	0	0
SSU ribosomal protein S15p (S13e)	0	1	0	0
SSU ribosomal protein S1p	0	1	0	0
Strictosidine synthase precursor (EC 4.3.3.2)	0	1	0	0
Succinate dehydrogenase cytochrome b-556 subunit	0	1	0	0
Succinate dehydrogenase hydrophobic membrane anchor protein	0	1	0	0
Succinate dehydrogenase iron-sulfur protein (EC 1.3.99.1)	0	1	0	0
Succinate-semialdehyde dehydrogenase [NAD] (EC 1.2.1.24); Succinate-semialdehyde dehydrogenase [NADP+] (EC 1.2.1.16)	0	1	0	0
Succinyl-CoA ligase [ADP-forming] alpha chain (EC 6.2.1.5)	0	1	0	0
Sucrose phosphorylase (EC 2.4.1.7)	0	1	0	0
Sulfate adenylyltransferase subunit 1 (EC 2.7.7.4)	0	1	0	0
Sulfate adenylyltransferase subunit 2 (EC 2.7.7.4)	0	1	0	0
Sulfur carrier protein adenylyltransferase ThiF	0	1	0	0
Sun protein	0	1	0	0
TesB-like acyl-CoA thioesterase 1	0	1	0	0
Thiamin-phosphate pyrophosphorylase (EC 2.5.1.3)	0	1	0	0
Thiamine-monophosphate kinase (EC 2.7.4.16)	0	1	0	0
Thiazole biosynthesis protein ThiG	0	1	0	0
Thioesterase family protein domain protein	0	1	0	0
Thiol peroxidase, Tpx-type (EC 1.11.1.15)	0	1	0	0
Thioredoxin family protein	0	1	0	0
Thioredoxin reductase (EC 1.8.1.9)	0	1	0	0
Threonine synthase (EC 4.2.3.1)	0	1	0	0
Thymidylate synthase (EC 2.1.1.45)	0	1	0	0
TonB protein	0	1	0	0
TonB-dependent receptor	0	4	0	0
TonB-dependent receptor; Outer membrane receptor for ferrienterochelin and colicins	0	1	0	0
Topoisomerase IV subunit A (EC 5.99.1.-)	0	1	0	0
TPR domain protein in aerotolerance operon	0	1	0	0
TPR domain protein, putative component of TonB system	0	1	0	0
TPR repeat containing protein	0	1	0	0
Transcription antitermination protein NusG	0	1	0	0
Transcription termination protein NusB	0	1	0	0
Transcriptional regulator in PFGI-1-like cluster	0	1	0	0
Transcriptional regulator VpsT	0	1	0	0
Transcriptional regulator, Cro/CI family	0	1	0	0
Transcriptional regulator, HxlR family	0	1	0	0
Transcriptional regulator, LuxR family	0	2	0	0
Transcriptional regulator, LysR family, in formaldehyde detoxification operon	0	1	0	0
Transcriptional regulator, MarR family	0	1	0	0
Transcriptional regulator, MerR family	0	2	0	0
Transglutaminase-like enzymes, putative cysteine proteases	0	1	0	0
Transglycosylase, Slt family	0	1	0	0
Translation elongation factor G paralog	0	1	0	0
Translation elongation factor P	0	1	0	0
Translation elongation factor Tu	0	2	0	0
Translation initiation factor 2	0	1	0	0
Translation initiation factor SUI1-related protein	0	1	0	0
Transmembrane transport protein	0	1	0	0
transport protein	0	1	0	0
transport system permease protein	0	1	0	0
transposase and inactivated derivative	0	1	0	0
Trk system potassium uptake protein TrkA	0	1	0	0
tRNA (5-methoxyuridine) 34 synthase	0	1	0	0
tRNA (Uracil54-C5-)-methyltransferase (EC 2.1.1.35)	0	1	0	0
tRNA (uridine-5-oxyacetic acid methyl ester) 34 synthase	0	1	0	0
tRNA dihydrouridine synthase B (EC 1.-.-.-)	0	1	0	0
tRNA pseudouridine synthase B (EC 4.2.1.70)	0	1	0	0
tRNA S(4)U 4-thiouridine synthase (former ThiI) / Rhodanese-like domain required for thiamine synthesis	0	1	0	0
tRNA uridine 5-carboxymethylaminomethyl modification enzyme GidA	0	1	0	0
tRNA-Ala-TGC	0	1	0	0
tRNA-Arg-ACG	0	1	0	0
tRNA-Asn-GTT	0	1	0	0
tRNA-Asp-GTC	0	1	0	0
tRNA-dihydrouridine synthase C (EC 1.-.-.-)	0	1	0	0
tRNA-Gly-TCC	0	1	0	0
tRNA-Leu-GAG	0	1	0	0
tRNA-Ser-GGA	0	1	0	0
tRNA-specific adenosine-34 deaminase (EC 3.5.4.-)	0	1	0	0
tRNA-Thr-GGT	0	1	0	0
tRNA-Trp-CCA	0	1	0	0
tRNA-Tyr-GTA	0	1	0	0
Tryptophan synthase beta chain (EC 4.2.1.20)	0	1	0	0
TsaC protein (YrdC domain) required for threonylcarbamoyladenosine t(6)A37 modification in tRNA	0	1	0	0
Twin-arginine translocation protein TatA	0	1	0	0
Twin-arginine translocation protein TatB	0	1	0	0
twitching motility protein PilG	0	1	0	0
twitching motility protein PilH	0	2	0	0
two component transcriptional regulator, LuxR family	0	1	0	0
Two-component hybrid sensor and regulator	0	2	0	0
Type II secretory pathway, ATPase PulE/Tfp pilus assembly pathway, ATPase PilB	0	1	0	0
Type IIA topoisomerase (DNA gyrase/topo II, topoisomerase IV), A subunit	0	1	0	0
Type IV fimbrial assembly protein PilC	0	1	0	0
Type IV fimbrial assembly, ATPase PilB	0	1	0	0
Type IV pilus biogenesis protein PilF	0	1	0	0
Type IV pilus biogenesis protein PilN	0	1	0	0
Type IV pilus biogenesis protein PilO	0	1	0	0
Type IV pilus biogenesis protein PilP	0	1	0	0
Type IV pilus biogenesis protein PilQ	0	1	0	0
Type IV secretory pathway, VirB4 components	0	1	0	0
Type IV secretory pathway, VirD4 components	0	2	0	0
Type VI secretion lipoprotein/VasD	0	1	0	0
Tyrosine protein kinase:Serine/threonine protein kinase	0	1	0	0
Ubiquinone/menaquinone biosynthesis methyltransferase UbiE (EC 2.1.1.-) @ 2-heptaprenyl-1,4-naphthoquinone methyltransferase (EC 2.1.1.163)	0	1	0	0
UDP-3-O-[3-hydroxymyristoyl] N-acetylglucosamine deacetylase (EC 3.5.1.-)	0	1	0	0
UDP-N-acetylenolpyruvoylglucosamine reductase (EC 1.1.1.158)	0	1	0	0
UDP-N-acetylmuramate--alanine ligase (EC 6.3.2.8)	0	1	0	0
Uncharacterized protein COG3236	0	1	0	0
Uncharacterized protein EC-HemY, likely associated with heme metabolism based on gene clustering with hemC, hemD in Proteobacteria (unrelated to HemY-type PPO in GramPositives)	0	1	0	0
Uncharacterized protein ImpA	0	1	0	0
Uncharacterized protein ImpB	0	1	0	0
Uncharacterized protein ImpC	0	2	0	0
Uncharacterized protein ImpF	0	1	0	0
Uncharacterized protein ImpJ/VasE	0	1	0	0
Uncharacterized protein ynbE; probable lipoprotein STY1424	0	1	0	0
Universal stress protein E	0	1	0	0
unknown, without homologous in databases	0	1	0	0
UPF0028 protein YchK	0	1	0	0
UPF0152 protein PA0474	0	1	0	0
Uracil phosphoribosyltransferase (EC 2.4.2.9) / Pyrimidine operon regulatory protein PyrR	0	1	0	0
Urea ABC transporter, ATPase protein UrtD	0	1	0	0
Urea ABC transporter, ATPase protein UrtE	0	2	0	0
Urea ABC transporter, permease protein UrtB	0	1	0	0
Urea ABC transporter, permease protein UrtC	0	2	0	0
Urea ABC transporter, substrate binding protein UrtA	0	1	0	0
Urea ABC transporter, urea binding protein	0	2	0	0
Urea carboxylase (EC 6.3.4.6)	0	1	0	0
Uroporphyrinogen III decarboxylase (EC 4.1.1.37)	0	1	0	0
Uroporphyrinogen-III synthase (EC 4.2.1.75)	0	1	0	0
Utilization protein for unknown catechol-siderophore X	0	1	0	0
VacJ-like lipoprotein precursor	0	1	0	0
Xaa-Pro dipeptidase	0	1	0	0
YciL protein	0	1	0	0
YgfY COG2938	0	1	0	0
Zinc ABC transporter, ATP-binding protein ZnuC	0	1	0	0
Zinc ABC transporter, inner membrane permease protein ZnuB	0	1	0	0
Zinc ABC transporter, periplasmic-binding protein ZnuA	0	1	0	0
Zinc uptake regulation protein ZUR	0	1	0	0
Zinc-regulated outer membrane receptor	0	1	0	0
